# Supplementary material
Source: PubMed Central journal article supplement (PMC4207392)
Supplement: supp_db14-0214_DB140214SupplementaryData2.pdf [file supp_db14-0214_DB140214SupplementaryData2.pdf]

Supplemental TABLE 1 Subject Information

Antibody Status (embolded is positive)

| Sample Identifier                                                         | Gender | HbA1c(%)   | Number of detected AA specificities (0-4) | Antibody Status (embolded is positive) |               |               |               |             | Age at Visit | Age at Diagnosis | Plasma Glucose (mg/dl) | BMI | Serum Signature [S] | Positive for AA at One or More Later Time Points |
|---------------------------------------------------------------------------|--------|------------|-------------------------------------------|----------------------------------------|---------------|---------------|---------------|-------------|--------------|------------------|------------------------|-----|---------------------|--------------------------------------------------|
|                                                                           |        |            |                                           | GAD                                    | IA2           | IAA           | ZnT8          | AddBack [A] |              |                  |                        |     | ELISA [C]           |                                                  |
| <b>Auto-antibody-negative (AA-) Low HLA Risk Siblings (nonDR3 nonDR4)</b> |        |            |                                           |                                        |               |               |               |             |              |                  |                        |     |                     |                                                  |
| LR135                                                                     | Male   | Not tested | 0                                         | -0.006                                 | -0.0017       | 0             | -0.0118       | 9.4575      |              | 82               | 19.1                   | SC  | No                  |                                                  |
| LR293                                                                     | Male   | Not tested | 0                                         | 0.002                                  | 0.0005        | 0.03          | -0.0003       | 8.8466      |              | 94               | 15.5                   | SC  | No                  |                                                  |
| LR1846                                                                    | Male   | Not tested | 0                                         | 0.0129                                 | -0.0007       | -0.0084       | -0.013        | 8.2192      |              | 96               | 15.5                   | SC  | No                  |                                                  |
| LR1918                                                                    | Female | Not tested | 0                                         | 0.0082                                 | -0.0011       | -0.0034       | -0.01         | 9.0822      |              | 94               | 16.5                   | SC  | No                  |                                                  |
| LR1922                                                                    | Male   | Not tested | 0                                         | 0.0229                                 | -0.0017       | 0.0065        | -0.008        | 7.4521      |              | 96               | 17.0                   | SC  | No                  |                                                  |
| LR1940                                                                    | Male   | Not tested | 0                                         | 0.0107                                 | 0.0003        | -0.0017       | -0.011        | 7.0192      |              | 94               | 16.4                   | SC  | No                  |                                                  |
| LR1976                                                                    | Male   | Not tested | 0                                         | 0.0075                                 | -0.0009       | 0             | -0.007        | 8.0712      |              | 83               | 18.3                   | SC  | No                  |                                                  |
| LR1982                                                                    | Female | Not tested | 0                                         | 0.0146                                 | -0.0012       | 0.0027        | -0.006        | 6.5589      |              | 93               | 19.1                   | SC  | No                  |                                                  |
| LR2110                                                                    | Female | Not tested | 0                                         | 0.005                                  | -0.0016       | 0             | -0.002        | 8.7068      |              | 107              | 19.9                   | SC  | No                  |                                                  |
| LR2138                                                                    | Male   | Not tested | 0                                         | -0.0094                                | 0.0011        | 0.0115        | -0.01         | 7.3178      |              | 95               | 15.9                   | SC  | No                  |                                                  |
| LR2532                                                                    | Male   | Not tested | 0                                         | -0.0075                                | -0.0018       | -0.0071       | -0.0044       | 8.0027      |              | 82               | 15.0                   | SC  | No                  |                                                  |
| LR2560                                                                    | Female | Not tested | 0                                         | 0.0002                                 | -0.0017       | 0.0108        | -0.0028       | 9.2932      |              | 93               | 16.0                   | SC  | No                  |                                                  |
| LR2215                                                                    | Female | Not tested | 0                                         | -0.0014                                | -0.0021       | -0.0066       | -0.01         | 7.1123      |              | 80               | 15.3                   | SC  | No                  |                                                  |
| LR2707                                                                    | Female | Not tested | 0                                         | -0.0002                                | 0             | -0.003        | 0.014         | 6.1945      |              | 94               | 15.9                   | SC  | No                  |                                                  |
| LR15                                                                      | Female | Not tested | 0                                         | 0.0059                                 | -0.0003       | 0.0119        | -0.0099       | 8.8548      |              | 128              | 18.2                   | S   | No                  |                                                  |
| LR88                                                                      | Male   | Not tested | 0                                         | -0.0177                                | 0.001         | 0.009         | -0.0083       | 5.5068      |              | 91               | 16.7                   | SC  | No                  |                                                  |
| LR101                                                                     | Female | Not tested | 0                                         | -0.0171                                | -0.001        | 0.0112        | -0.0098       | 5.1041      |              | 86               | 17.6                   | SC  | No                  |                                                  |
| LR342                                                                     | Female | Not tested | 0                                         | 0.0117                                 | 0.0009        | 0.0033        | -0.0009       | 8.1836      |              | 96               | 14.5                   | SA  | No                  |                                                  |
| LR345                                                                     | Male   | Not tested | 0                                         | -0.002                                 | -0.0002       | 0.0165        | 0.0019        | 9.6959      |              | 98               | 15.7                   | SC  | No                  |                                                  |
| LR356                                                                     | Male   | Not tested | 0                                         | -0.0049                                | -0.0046       | 0.0025        | -0.0058       | 5.3671      |              | 98               | 18.9                   | S   | No                  |                                                  |
| LR884                                                                     | Female | Not tested | 0                                         | -0.0071                                | 0.0023        | 0.0035        | -0.0058       | 7.3123      |              | 102              | 15.4                   | SC  | No                  |                                                  |
| LR890                                                                     | Male   | Not tested | 0                                         | -0.0027                                | -0.0014       | -0.0017       | -0.0039       | 5.7425      |              | 158              | 13.9                   | S   | No                  |                                                  |
| LR992                                                                     | Female | Not tested | 0                                         | -0.0032                                | 0.0002        | 0             | -0.0075       | 5.1205      |              | 75               | 16.1                   | S   | No                  |                                                  |
| LR1050                                                                    | Female | Not tested | 0                                         | 0.0045                                 | 0.0018        | 0.0031        | -0.0021       | 8.2877      |              | 95               | 21.6                   | SC  | No                  |                                                  |
| LR1226                                                                    | Female | Not tested | 0                                         | 0.0072                                 | -0.0005       | -0.0154       | 0.018         | 9.6849      |              | 78               | 17.3                   | S   | No                  |                                                  |
| LR1477                                                                    | Male   | Not tested | 0                                         | 0.0028                                 | 0.0005        | 0.0039        | -0.01         | 8.8         |              | 82               | 25.5                   | SC  | No                  |                                                  |
| LR1700                                                                    | Male   | Not tested | 0                                         | 0                                      | -0.003        | 0             | -0.011        | 5.4384      |              | 90               | 15.8                   | S   | No                  |                                                  |
| LR1857                                                                    | Female | Not tested | 0                                         | 0.0104                                 | -0.003        | -0.0017       | -0.013        | 8.3507      |              | 106              | 14.2                   | S   | No                  |                                                  |
| LR140                                                                     | Female | Not tested | 0                                         | -0.0006                                | -0.0018       | 0.01          | -0.0016       | 11.5562     |              | 79               | 15.2                   | SC  | No                  |                                                  |
| LR158                                                                     | Female | Not tested | 0                                         | -0.0001                                | -0.0001       | 0.0035        | -0.0086       | 11.3589     |              | 89               | 18.0                   | S   | No                  |                                                  |
| LR1497                                                                    | Male   | Not tested | 0                                         | 0.0116                                 | -0.0019       | 0.0014        | -0.002        | 10.537      |              | 83               | 14.5                   | SC  | No                  |                                                  |
| LR185                                                                     | Male   | Not tested | 0                                         | 0.0068                                 | 0.0024        | -0.0066       | -0.0112       | 11.7973     |              | 99               | 30.1                   | SC  | No                  |                                                  |
| LR1592                                                                    | Male   | Not tested | 0                                         | 0.0584                                 | -0.0014       | -0.0032       | -0.009        | 11.5233     |              | 89               | 17.4                   | SC  | No                  |                                                  |
| LR2091                                                                    | Female | Not tested | 0                                         | 0.0023                                 | -0.0024       | 0.003         | -0.002        | 11.5342     |              | 76               | 19.1                   | SA  | No                  |                                                  |
| LR2489                                                                    | Male   | Not tested | 0                                         | -0.0074                                | -0.0021       | 0             | -0.002        | 11.2082     |              | 84               | 16.8                   | S   | No                  |                                                  |
| LR2683                                                                    | Male   | Not tested | 0                                         | 0.0008                                 | -0.002        | -0.0041       | -0.005        | 10.7041     |              | 85               | 15.5                   | S   | No                  |                                                  |
| LR2696                                                                    | Female | Not tested | 0                                         | -0.0002                                | -0.0009       | 0.0427        | -0.007        | 10.1836     |              | 81               | 22.8                   | S   | No                  |                                                  |
| LR2761                                                                    | Male   | Not tested | 0                                         | -0.0017                                | 0.0002        | 0.0093        | -0.003        | 10.6959     |              | 97               | 23.8                   | S   | No                  |                                                  |
| LR2379                                                                    | Female | Not tested | 0                                         | 0.0016                                 | -0.0006       | 0.0077        | -0.006        | 5.0986      |              | 76               | 14.5                   | SC  | No                  |                                                  |
| LR2477                                                                    | Male   | Not tested | 0                                         | -0.0026                                | 0.0015        | 0.0057        | -0.005        | 8.7014      |              | 130              | 15.3                   | SC  | No                  |                                                  |
| LR2549                                                                    | Male   | Not tested | 0                                         | -0.0019                                | 0.0003        | 0.0075        | -0.0064       | 7.4137      |              | 118              | 15.1                   | SC  | No                  |                                                  |
| LR2731                                                                    | Male   | Not tested | 0                                         | -0.0021                                | 0.0001        | -0.0052       | -0.009        | 8.5562      |              | 76               | 16.2                   | SCA | No                  |                                                  |
| LR883                                                                     | Female | Not tested | 0                                         | -0.0036                                | 0.0001        | 0.0139        | -0.0075       | 9.5644      |              | 99               | 16.7                   | C   | No                  |                                                  |
| LR1858                                                                    | Female | Not tested | 0                                         | 0.0148                                 | -0.0028       | -0.005        | -0.011        | 5.9534      |              | 108              | 14.6                   | C   | No                  |                                                  |
| <b>Recent onset T1DM</b>                                                  |        |            |                                           |                                        |               |               |               |             |              |                  |                        |     |                     |                                                  |
| RO1973                                                                    | Female | 8.1        | 4                                         | <b>0.1504</b>                          | <b>0.4984</b> | <b>0.3321</b> | <b>0.657</b>  | 12.2        | 11.8         | 82               | 24.1                   | S   |                     |                                                  |
| RO2130                                                                    | Male   | 5.5        | 2                                         | 0.0524                                 | 0.0015        | <b>2.3055</b> | <b>0.131</b>  | 15.6        | 15.4         | 71               | 23.2                   | S   |                     |                                                  |
| RO2312                                                                    | Female | 10.4       | 4                                         | <b>0.2769</b>                          | <b>1.3095</b> | <b>0.0917</b> | <b>0.812</b>  | 14.6        | 14.6         | 199              | 16.9                   | SC  |                     |                                                  |
| RO1964                                                                    | Female | 9.8        | 4                                         | <b>0.6068</b>                          | <b>0.7542</b> | <b>0.6435</b> | <b>0.447</b>  | 9.8         | 9.8          | 116              | 17.9                   | SC  |                     |                                                  |
| RO2348                                                                    | Female | 5.5        | 4                                         | <b>0.1312</b>                          | <b>0.1777</b> | <b>1.9395</b> | <b>0.701</b>  | 9.6         | 9.4          | 84               | 14.6                   | SC  |                     |                                                  |
| RO2366                                                                    | Male   | 7.7        | 1                                         | 0.0615                                 | -0.0003       | <b>0.1669</b> | -0.009        | 7.7         | 7.5          | 177              | 15.5                   | SC  |                     |                                                  |
| RO2598                                                                    | Male   | 7.9        | 4                                         | <b>0.1275</b>                          | <b>0.0036</b> | <b>4.9503</b> | <b>0.089</b>  | 6.7         | 6.2          | 103              | 17.2                   | SC  |                     |                                                  |
| RO1939                                                                    | Female | 6.8        | 4                                         | <b>0.1129</b>                          | <b>0.8125</b> | <b>0.5275</b> | <b>0.92</b>   | 11.2        | 11.0         | 230              | 18.4                   | SCA |                     |                                                  |
| RO2109                                                                    | Female | 7          | 4                                         | <b>0.1598</b>                          | <b>1.161</b>  | <b>7.0612</b> | <b>0.621</b>  | 10.3        | 9.9          | 267              | 20.5                   | SCA |                     |                                                  |
| RO253                                                                     | Male   | 6.4        | 4                                         | <b>0.1177</b>                          | <b>1.2554</b> | <b>3.0061</b> | <b>0.7596</b> | 10.7        | 10.4         | 89               | 24.3                   | SCA |                     |                                                  |
| RO2024                                                                    | Female | Not tested | 0                                         | N/A                                    | N/A           | N/A           | N/A           | 10.4        | 10.0         | N/A              | 15.0                   | SA  |                     |                                                  |
| RO1037                                                                    | Male   | 5.4        | 4                                         | <b>0.0895</b>                          | <b>0.6347</b> | <b>2.4508</b> | <b>0.1611</b> | 10.2        | 9.8          | N/A              | 19.3                   | SCA |                     |                                                  |
| RO1437                                                                    | Male   | 6.8        | 3                                         | 0.0455                                 | <b>0.1381</b> | <b>0.4207</b> | <b>0.618</b>  | 10.4        | 10.0         | 195              | 16.8                   | SCA |                     |                                                  |
| RO2944                                                                    | Female | 8.6        | 4                                         | <b>0.7483</b>                          | <b>0.3721</b> | <b>0.274</b>  | <b>1.195</b>  | 6.5         | 6.4          | 86               | 15.5                   | SA  |                     |                                                  |
| RO2953                                                                    | Female | 7.5        | 3                                         | <b>0.1535</b>                          | <b>0.7392</b> | <b>0.5347</b> | -0.001        | 9.1         | 8.9          | N/A              | 16.5                   | SCA |                     |                                                  |
| RO2185                                                                    | Male   | 7.5        | 4                                         | <b>1.3191</b>                          | <b>0.567</b>  | <b>3.6172</b> | <b>0.772</b>  | 7.2         | 6.8          | 182              | 14.6                   | SCA |                     |                                                  |
| RO1707                                                                    | Female | 6.5        | 3                                         | <b>0.0736</b>                          | <b>0.449</b>  | 0.0397        | <b>0.425</b>  | 8.0         | 7.7          | 328              | 14.7                   | SCA |                     |                                                  |
| RO2676                                                                    | Female | 8.8        | 4                                         | <b>0.7234</b>                          | <b>0.0073</b> | <b>0.2875</b> | <b>0.131</b>  | 8.1         | 7.8          | 278              | 13.8                   | SCA |                     |                                                  |
| RO1012                                                                    | Female | 8          | 2                                         | 0.0373                                 | <b>0.3809</b> | <b>1.0658</b> | 0.0103        | 9.3         | 9.0          | 156              | 16.3                   | SCA |                     |                                                  |
| RO246                                                                     | Male   | 8.8        | 2                                         | 0.05                                   | <b>0.3562</b> | <b>0.0772</b> | N/A           | 9.9         | 9.8          | 82               | 15.3                   | SCA |                     |                                                  |
| RO946                                                                     | Female | 7.8        | 4                                         | <b>0.8969</b>                          | <b>1.0161</b> | <b>3.6723</b> | <b>0.6068</b> | 10.8        | 10.7         | 78               | 22.4                   | SCA |                     |                                                  |
| RO1442                                                                    | Female | 7.2        | 4                                         | <b>0.3078</b>                          | <b>0.0165</b> | <b>3.2237</b> | <b>0.131</b>  | 6.0         | 5.7          | 237              | 18.7                   | SCA |                     |                                                  |
| RO201                                                                     | Male   | 8.3        | 4                                         | <b>0.1978</b>                          | <b>0.5656</b> | <b>0.767</b>  | <b>0.5919</b> | 6.7         | 6.4          | 78               | 16.3                   | SCA |                     |                                                  |
| RO930                                                                     | Female | 7.3        | 2                                         | 0.012                                  | <b>0.9537</b> | <b>2.4592</b> | -0.0051       | 6.7         | 6.2          | 92               | 14.3                   | SCA |                     |                                                  |
| RO62                                                                      | Female | 7.4        | 4                                         | <b>0.1396</b>                          | <b>0.4377</b> | <b>0.102</b>  | <b>0.0924</b> | 7.0         | 6.5          | 291              | 19.8                   | SCA |                     |                                                  |
| RO189                                                                     | Female | 7          | 4                                         | <b>0.08</b>                            | <b>1.0646</b> | <b>0.7346</b> | <b>0.6288</b> | 7.2         | 6.9          | 161              | 15.2                   | SCA |                     |                                                  |
| RO1057                                                                    | Female | 7.1        | 2                                         | <b>0.1644</b>                          | 0.0014        | <b>0.1225</b> | -0.005        | 8.8         | 8.4          | 252              | 15.9                   | SCA |                     |                                                  |
| RO2808                                                                    | Male   | 6.4        | 4                                         | <b>0.1063</b>                          | <b>0.4445</b> | <b>0.5883</b> | <b>0.847</b>  | 9.6         | 9.4          | 169              | 22.8                   | SCA |                     |                                                  |
| RO2991                                                                    | Female | 5.6        | 4                                         | <b>0.1246</b>                          | <b>0.8591</b> | <b>0.1183</b> | <b>0.172</b>  | 9.6         | 9.2          | 166              | 20.2                   | SA  |                     |                                                  |
| RO2503                                                                    | Male   | 7.3        | 2                                         | 0.029                                  | <b>0.0861</b> | <b>3.1306</b> | 0.0034        | 11.1        | 10.7         | 121              | 17.0                   | SA  |                     |                                                  |
| RO2903                                                                    | Male   | 7.7        | 2                                         | <b>0.4621</b>                          | -0.003        | <b>0.7849</b> | 0             | 11.4        | 11.2         | 81               | 17.3                   | SCA |                     |                                                  |
| RO972                                                                     | Male   | 6.9        | 4                                         | <b>1.1544</b>                          | <b>1.1083</b> | <b>4.6644</b> | <b>0.0885</b> | 11.8        | 11.5         | 139              | 18.8                   | SCA |                     |                                                  |
| RO2559                                                                    | Male   | 6.1        | 4                                         | <b>0.2532</b>                          | <b>0.0395</b> | <b>1.3852</b> | <b>0.2487</b> | 11.8        | 11.4         | 108              | 18.2                   | SA  |                     |                                                  |
| RO2751                                                                    | Male   | 7.6        | 2                                         | <b>0.0806</b>                          | -0.0001       | <b>0.1855</b> | 0.004         | 11.8        | 11.6         | 82               | 16.2                   | SA  |                     |                                                  |
| RO2936                                                                    | Male   | 6.2        | 3                                         | <b>0.5871</b>                          | <b>0.5838</b> | <b>9.2393</b> | -0.007        | 11.8        | 11.6         | 100              | 17.3                   | SA  |                     |                                                  |
| RO2359                                                                    | Female | 8.6        | 3                                         | 0.0017                                 | <b>0.8849</b> | <b>0.103</b>  | <b>0.284</b>  | 12.0        | 11.9         | 77               | 17.6                   | SA  |                     |                                                  |

|          |        |     |   |               |               |               |               |      |      |     |      |     |
|----------|--------|-----|---|---------------|---------------|---------------|---------------|------|------|-----|------|-----|
| RO1997   | Male   | 7.1 | 3 | <b>0.6085</b> | <b>0.2183</b> | <b>3.529</b>  | -0.005        | 13.0 | 12.8 | 136 | 20.9 | SA  |
| RO3087   | Male   | 8.8 | 4 | <b>0.2383</b> | <b>0.1682</b> | <b>0.3882</b> | <b>0.6379</b> | 7.8  | 7.2  | 299 | 15.8 | SCA |
| RO3052   | Female | 7.1 | 3 | <b>0.308</b>  | <b>0.041</b>  | <b>0.7766</b> | 0.0015        | 9.0  | 8.4  | 238 | 18.5 | SA  |
| RO3153   | Female | 9.5 | 3 | 0.015         | <b>0.543</b>  | <b>1.9255</b> | <b>0.5183</b> | 8.0  | 7.4  | 80  | 15.1 | SCA |
| RO3040   | Male   | 8.3 | 3 | 0.0067        | <b>0.5235</b> | <b>0.436</b>  | <b>0.5023</b> | 7.5  | 6.9  | 137 | 19.8 | SA  |
| RO3045   | Male   | 6.8 | 2 | 0.0285        | -0.0021       | <b>1.303</b>  | <b>0.7737</b> | 11.6 | 11.0 | 106 | 15.8 | SCA |
| RO3139   | Female | 6.8 | 4 | <b>1.3488</b> | <b>0.1839</b> | <b>1.4278</b> | <b>0.3987</b> | 12.5 | 12.0 | 182 | 17.8 | SA  |
| RO159    | Female | 9.8 | 3 | <b>0.2988</b> | 0.0002        | <b>1.4891</b> | <b>0.6071</b> | 6.1  | 5.7  | 63  | 16.1 | SCA |
| RO1579   | Female | 7.8 | 3 | 0.0495        | <b>0.5027</b> | <b>5.2452</b> | <b>0.7</b>    | 7.0  | 6.8  | 231 | 16.0 | SC  |
| RO1225   | Male   | 8.8 | 4 | <b>0.3836</b> | <b>0.614</b>  | <b>1.1782</b> | <b>0.308</b>  | 11.8 | 11.3 | 204 | 20.6 | SA  |
| LO2132A6 | Male   | 5.5 | 4 | <b>0.2441</b> | <b>1.1301</b> | <b>0.8804</b> | <b>0.443</b>  | 21.9 | 21.7 | 185 | 27.2 | S   |
| RO2238   | Male   | 7.7 | 3 | 0.0327        | <b>0.5428</b> | <b>5.2753</b> | <b>0.965</b>  | 5.8  | 5.4  | 199 | 19.5 | C   |
| RO2034   | Male   | 6.8 | 4 | <b>1.1162</b> | <b>1.0741</b> | <b>1.7151</b> | <b>0.915</b>  | 6.0  | 5.8  | 139 | 15.7 | C   |
| RO355    | Female | 6.8 | 3 | 0.0083        | <b>0.5944</b> | <b>0.2184</b> | <b>0.3486</b> | 4.1  | 3.5  | 101 | 17.9 | C   |
| RO814    | Male   | 8.3 | 2 | <b>0.1062</b> | 0.0047        | <b>0.1083</b> | 0.0063        | 5.0  | 4.3  | 256 | N/A  | C   |
| RO363    | Female | 7.4 | 1 | 0.0083        | -0.0024       | <b>1.4439</b> | -0.0016       | 8.4  | 7.9  | 104 | 14.8 | C   |
| RO1071   | Female | 8.7 | 3 | <b>1.1759</b> | <b>1.0282</b> | <b>2.4215</b> | -0.003        | 11.5 | 11.4 | 186 | 19.4 | C   |
| RO1139   | Female | 6.9 | 4 | <b>1.7081</b> | <b>1.2789</b> | <b>3.2528</b> | <b>0.286</b>  | 11.0 | 10.8 | 208 | 16.9 | C   |
| RO1329   | Female | 7   | 2 | 0.066         | <b>0.2404</b> | <b>0.61</b>   | -0.002        | 7.2  | 7.1  | 78  | 14.7 | C   |
| RO1470   | Female | 5.7 | 3 | <b>0.098</b>  | <b>0.4971</b> | <b>2.7758</b> | 0.003         | 10.6 | 10.4 | 149 | 16.6 | C   |
| RO1475   | Male   | 5.8 | 3 | 0.0097        | <b>0.5294</b> | <b>0.6564</b> | <b>0.958</b>  | 11.3 | 11.1 | 126 | 20.5 | C   |
| RO1486   | Male   | 5.9 | 2 | -0.0004       | -0.0046       | <b>7.2202</b> | <b>0.08</b>   | 6.3  | 5.8  | 139 | 15.3 | C   |
| RO1541   | Female | 6.8 | 2 | 0.0605        | <b>0.1403</b> | <b>0.4607</b> | -0.003        | 10.2 | 9.8  | 161 | 99.9 | C   |
| RO1559   | Female | 7.5 | 3 | <b>0.1076</b> | -0.0002       | <b>4.1962</b> | <b>0.232</b>  | 9.6  | 9.1  | 240 | 15.4 | C   |
| RO1586   | Female | 7.2 | 3 | 0.0022        | <b>0.505</b>  | <b>0.6193</b> | <b>0.164</b>  | 5.6  | 5.2  | 202 | 20.1 | C   |
| RO1749   | Female | 8.8 | 4 | <b>0.6031</b> | <b>0.7622</b> | <b>4.5672</b> | <b>0.499</b>  | 5.8  | 5.4  | 176 | 14.4 | C   |
| RO1916   | Female | 7.5 | 4 | <b>0.9789</b> | <b>0.6402</b> | <b>0.8433</b> | <b>1.165</b>  | 7.2  | 7.0  | 180 | 16.9 | C   |
| RO2522   | Female | 6.9 | 4 | <b>0.7122</b> | <b>0.8799</b> | <b>0.4855</b> | <b>0.7886</b> | 7.9  | 7.6  | 168 | 15.4 | C   |

**Auto-antibody-negative (AA-) High HLA Risk Siblings (DR3 and/or DR4)**

|        |        |            |   |         |         |         |         |      |  |     |      |     |     |
|--------|--------|------------|---|---------|---------|---------|---------|------|--|-----|------|-----|-----|
| HR49   | Female | Not tested | 1 | -0.0061 | -0.0012 | 0.0149  | 0.0872  | 8.0  |  | 118 | 16.2 | SC  | Yes |
| HR69   | Female | Not tested | 0 | -0.0055 | -0.0001 | -0.0037 | -0.0079 | 6.3  |  | 85  | 15.2 | SC  | No  |
| HR130  | Male   | Not tested | 1 | -0.0031 | 0.0002  | 0.0049  | 0.0426  | 9.4  |  | 84  | 18.4 | SC  | Yes |
| HR215  | Female | Not tested | 0 | 0.0227  | 0.0006  | 0.01    | -0.0009 | 9.1  |  | 97  | 17.2 | SC  | No  |
| HR229  | Male   | Not tested | 0 | 0.0094  | -0.0023 | 0.009   | 0.0017  | 9.5  |  | 102 | 18.1 | SCA | No  |
| HR334  | Male   | Not tested | 0 | 0.006   | -0.0002 | -0.0052 | -0.0023 | 7.8  |  | 88  | 16.0 | SC  | No  |
| HR338  | Male   | Not tested | 0 | 0.0029  | 0.0016  | 0       | -0.0056 | 8.7  |  | 83  | 14.5 | SC  | No  |
| HR371  | Male   | Not tested | 0 | 0.0039  | -0.0081 | -0.0048 | -0.006  | 7.6  |  | 94  | 21.3 | SC  | No  |
| HR878  | Female | Not tested | 0 | 0.0021  | -0.0006 | -0.0034 | -0.0028 | 8.1  |  | 94  | 16.6 | SC  | No  |
| HR1498 | Female | Not tested | 0 | 0.0268  | -0.0035 | -0.0086 | -0.001  | 7.3  |  | 81  | 13.6 | SC  | No  |
| HR1593 | Female | Not tested | 0 | 0.0073  | -0.0011 | -0.0048 | -0.001  | 5.5  |  | 80  | 15.4 | SC  | No  |
| HR1771 | Female | Not tested | 0 | 0.0233  | -0.0013 | 0.0268  | 0.017   | 8.3  |  | 88  | 18.9 | SC  | Yes |
| HR2537 | Female | Not tested | 0 | 0.0119  | 0.0003  | 0.002   | -0.0022 | 6.4  |  | 83  | 14.4 | SC  | Yes |
| HR2251 | Female | Not tested | 0 | 0.0045  | -0.001  | -0.0022 | -0.01   | 7.3  |  | 110 | 22.3 | SC  | Yes |
| HR2339 | Female | Not tested | 0 | -0.0035 | -0.0025 | 0.0059  | -0.005  | 5.5  |  | 77  | 14.3 | SC  | No  |
| HR182  | Male   | Not tested | 0 | 0.0104  | 0.0019  | 0.0131  | -0.0016 | 9.0  |  | 90  | 15.0 | SC  | No  |
| HR1710 | Male   | Not tested | 0 | 0.0061  | -0.0015 | 0.0118  | -0.013  | 5.5  |  | 93  | 15.5 | S   | No  |
| HR6    | Female | Not tested | 0 | -0.0062 | -0.0013 | -0.0051 | -0.0032 | 11.1 |  | 99  | 23.3 | SC  | Yes |
| HR22   | Male   | Not tested | 0 | 0.0107  | 0.0004  | -0.0011 | 0.0063  | 11.0 |  | 93  | 20.9 | SCA | No  |
| HR26   | Female | Not tested | 0 | -0.0049 | 0.002   | -0.0079 | -0.0054 | 11.7 |  | 83  | 15.3 | SC  | No  |
| HR116  | Male   | Not tested | 0 | -0.0109 | 0       | 0.0022  | -0.0082 | 10.4 |  | 117 | 18.8 | SC  | No  |
| HR271  | Female | Not tested | 0 | 0.03    | -0.0006 | -0.0081 | 0.0251  | 11.4 |  | 87  | 18.8 | SC  | No  |
| HR1439 | Female | Not tested | 0 | -0.002  | -0.0054 | 0.0017  | -0.005  | 10.4 |  | 119 | 25.8 | S   | Yes |
| HR1975 | Female | Not tested | 0 | 0.0074  | -0.0006 | -0.0017 | -0.004  | 10.1 |  | 82  | 23.9 | SC  | No  |
| HR2051 | Male   | Not tested | 0 | 0.0023  | -0.0031 | -0.0016 | 0.004   | 10.0 |  | 95  | 16.6 | SC  | No  |
| HR2068 | Male   | Not tested | 0 | -0.0033 | -0.0005 | 0.0127  | -0.006  | 10.5 |  | 76  | 19.0 | SC  | No  |
| HR2767 | Female | Not tested | 0 | 0.0049  | -0.0007 | 0.013   | -0.004  | 5.4  |  | 99  | 15.7 | SC  | No  |
| HR2684 | Male   | Not tested | 0 | -0.0039 | -0.0015 | 0       | -0.008  | 7.1  |  | 103 | 14.5 | SC  | No  |
| HR2490 | Female | Not tested | 0 | 0.0007  | -0.0007 | -0.002  | -0.007  | 9.5  |  | 89  | 18.0 | SC  | No  |
| HR2654 | Female | Not tested | 0 | -0.0012 | -0.0011 | 0.0031  | -0.009  | 8.5  |  | 92  | 26.2 | SC  | No  |
| HR7    | Female | Not tested | 0 | -0.0004 | -0.0004 | -0.0101 | -0.0043 | 8.1  |  | 93  | 17.1 | CA  | No  |
| HR214  | Female | Not tested | 0 | 0.0068  | 0.0028  | 0       | -0.0023 | 10.4 |  | 87  | 19.5 | C   | No  |

**Unrelated Healthy Controls**

|        |        |            |   |         |         |         |         |      |  |     |      |    |
|--------|--------|------------|---|---------|---------|---------|---------|------|--|-----|------|----|
| HC2074 | Male   | Not tested | 0 | -0.0098 | -0.0043 | 0       | -0.005  | 23.0 |  | 87  | 23.8 | SC |
| HC2302 | Female | Not tested | 1 | 0.0166  | 0.0004  | 0.1812  | -0.009  | 21.3 |  | 81  | 19.0 | S  |
| HC2593 | Female | Not tested | 0 | 0.0088  | -0.001  | 0.0088  | 0       | 23.3 |  | 82  | 19.1 | S  |
| HC2146 | Female | Not tested | 0 | N/A     | N/A     | N/A     | N/A     | 23.9 |  | N/A | N/A  | SC |
| HC223  | Female | Not tested | 0 | 0.0037  | -0.0005 | 0.005   | -0.0015 | 13.6 |  | 91  | 19.6 | S  |
| HC285  | Female | Not tested | 1 | -0.0117 | 0.0014  | 0.0917  | -0.0115 | 7.6  |  | 86  | 16.5 | S  |
| HC233  | Male   | Not tested | 0 | 0.005   | -0.0002 | 0.01    | -0.0032 | 8.9  |  | 98  | 16.1 | S  |
| HC294  | Male   | Not tested | 0 | -0.0069 | 0.001   | 0       | -0.0054 | 11.9 |  | 115 | 16.7 | S  |
| HC224  | Female | Not tested | 0 | 0.0057  | 0.0006  | 0       | -0.0075 | 13.7 |  | 93  | 23.2 | S  |
| HC217  | Male   | Not tested | 0 | -0.0016 | -0.0019 | 0.01    | -0.007  | 10.1 |  | 82  | N/A  | SC |
| HC226  | Female | Not tested | 0 | -0.0038 | 0.0005  | 0.01    | -0.0049 | 11.3 |  | 77  | 26.8 | S  |
| HC2790 | Female | Not tested | 0 | -0.002  | 0.0017  | 0.0094  | -0.007  | 11.6 |  | 126 | 16.2 | SC |
| HC385  | Male   | Not tested | 0 | -0.0091 | -0.0015 | 0.0167  | -0.0101 | 12.3 |  | 92  | 19.6 | S  |
| HC295  | Male   | Not tested | 0 | -0.0152 | -0.0004 | 0.0048  | -0.0065 | 12.4 |  | 96  | 19.4 | SC |
| HC272  | Female | Not tested | 0 | -0.0068 | 0.0032  | 0.0052  | -0.0104 | 6.3  |  | 97  | 19.5 | S  |
| HC375  | Female | Not tested | 0 | N/A     | N/A     | N/A     | N/A     | 9.4  |  | N/A | 21.4 | SC |
| HC2614 | Male   | Not tested | 0 | -0.0043 | -0.001  | -0.0031 | -0.009  | 10.3 |  | 102 | 18.9 | S  |
| HC2301 | Female | Not tested | 0 | 0.009   | 0.0002  | -0.0083 | -0.005  | 10.6 |  | 142 | 19.9 | S  |
| HC1006 | Male   | Not tested | 0 | 0.0043  | -0.0004 | 0       | -0.0077 | 12.8 |  | 95  | 26.1 | S  |
| HC390  | Male   | Not tested | 0 | -0.01   | -0.0009 | 0.016   | -0.0023 | 12.9 |  | 90  | 14.9 | S  |
| HC322  | Male   | Not tested | 0 | -0.0093 | 0.0014  | -0.0105 | -0.0024 | 12.9 |  | 102 | 17.0 | SC |
| HC381  | Female | Not tested | 0 | 0.0001  | 0.0022  | -0.0126 | -0.0098 | 13.1 |  | 110 | 25.8 | S  |
| HC379  | Female | Not tested | 0 | -0.0021 | 0.0006  | -0.0126 | -0.005  | 13.4 |  | 101 | 22.5 | S  |
| HC227  | Male   | Not tested | 0 | 0.0044  | 0.0014  | 0.011   | 0       | 14.1 |  | 91  | 21.0 | S  |
| HC1777 | Female | Not tested | 0 | 0.0142  | -0.0005 | 0.0213  | -0.015  | 14.9 |  | 90  | 19.0 | S  |
| HC384  | Female | Not tested | 0 | -0.0024 | 0.0007  | 0.0042  | -0.0062 | 15.0 |  | 86  | 21.1 | S  |
| HC394  | Female | Not tested | 0 | -0.0066 | 0.0027  | 0.0016  | -0.0077 | 15.2 |  | 85  | 31.7 | S  |
| HC1089 | Female | Not tested | 0 | -0.0055 | -0.0001 | -0.0071 | -0.006  | 15.8 |  | 78  | 17.4 | SC |

|        |        |            |   |         |         |         |         |      |     |      |    |
|--------|--------|------------|---|---------|---------|---------|---------|------|-----|------|----|
| HC1142 | Male   | Not tested | 0 | 0.0008  | -0.002  | -0.0056 | -0.009  | 16.3 | 81  | 22.3 | SC |
| HC1265 | Female | Not tested | 0 | 0.0042  | -0.0004 | -0.005  | -0.008  | 16.5 | 98  | 20.3 | SC |
| HC388  | Male   | Not tested | 0 | 0.0003  | -0.0007 | 0       | -0.0057 | 16.5 | 89  | 30.1 | SC |
| HC1249 | Female | Not tested | 0 | -0.01   | -0.0007 | -0.0041 | -0.007  | 16.6 | 86  | 28.7 | SC |
| HC2369 | Male   | Not tested | 0 | 0.0025  | 0.0009  | -0.0023 | -0.009  | 16.7 | 95  | 21.8 | SC |
| HC308  | Male   | Not tested | 0 | -0.016  | 0.002   | -0.0059 | -0.0074 | 17.1 | 88  | 20.5 | S  |
| HC305  | Male   | Not tested | 0 | 0.0019  | 0.0066  | 0.0006  | -0.0046 | 17.1 | 76  | 25.5 | SC |
| HC304  | Female | Not tested | 0 | 0.0003  | 0.003   | 0.0133  | -0.001  | 17.2 | 78  | 20.3 | SC |
| HC1601 | Female | Not tested | 0 | 0.0001  | 0.0008  | 0.0032  | 0.003   | 17.2 | 94  | 22.6 | SC |
| HC1543 | Female | Not tested | 0 | -0.0043 | 0.0003  | 0.0056  | -0.008  | 17.4 | N/A | 19.6 | SC |
| HC307  | Male   | Not tested | 0 | -0.0069 | 0.003   | 0.01    | -0.0065 | 17.6 | 83  | 26.3 | SC |
| HC1730 | Female | Not tested | 0 | 0.0133  | -0.0003 | 0.0069  | -0.009  | 17.8 | 76  | 27.7 | SC |
| HC1369 | Female | Not tested | 0 | 0.0246  | -0.0009 | 0.0086  | -0.011  | 21.1 | 85  | 22.4 | SC |
| HC1365 | Female | Not tested | 0 | 0.0023  | -0.0101 | 0.0174  | -0.009  | 21.8 | 92  | N/A  | SC |
| HC382  | Female | Not tested | 0 | 0.0069  | 0.0004  | 0       | -0.0047 | 13.0 | 101 | 19.3 | S  |
| HC1678 | Female | Not tested | 0 | 0       | -0.003  | -0.01   | -0.005  | 17.8 | 85  | 20.5 | SC |
| HC1005 | Female | Not tested | 0 | 0.0103  | 0.0019  | 0       | -0.0053 | 16.1 | 86  | 25.7 | C  |
| HC1759 | Male   | Not tested | 0 | 0.0101  | -0.0007 | 0.0115  | -0.008  | 16.8 | 75  | 23.2 | C  |
| HC284  | Male   | Not tested | 0 | -0.0097 | 0.001   | 0       | -0.0082 | 9.3  | 86  | 18.9 | C  |
| HC1837 | Female | Not tested | 0 | 0.0026  | -0.0009 | 0.0193  | -0.014  | 9.8  | 98  | N/A  | C  |
| HC2789 | Female | Not tested | 0 | 0.0008  | -0.0002 | -0.009  | -0.011  | 14.4 | 93  | 24.6 | C  |
| HC1600 | Female | Not tested | 0 | 0.0312  | 0.0002  | -0.0029 | 0.004   | 17.2 | 92  | 24.0 | C  |
| HC1247 | Male   | Not tested | 0 | -0.0098 | -0.0005 | -0.0041 | -0.006  | 24.3 | 90  | 24.6 | C  |
| HC2017 | Female | Not tested | 0 | 0.0025  | -0.0013 | 0       | 0.002   | 22.8 | 88  | 20.7 | C  |
| HC2368 | Male   | Not tested | 0 | 0.006   | -0.0005 | -0.0135 | -0.007  | 18.1 | 95  | 17.4 | C  |

**Longitudinal Progressor sample series**

|           |        |            |   |               |               |               |               |      |      |     |      |   |
|-----------|--------|------------|---|---------------|---------------|---------------|---------------|------|------|-----|------|---|
| RO T1D A1 | Male   | Not tested | 0 | 0.0169        | -0.0035       | -0.0017       | -0.0096       | 16.4 | 21.7 | 99  | 23.4 | S |
| RO T1D A2 | Male   | Not tested | 1 | 0.0659        | 0.0013        | 0.0044        | <b>0.4023</b> | 18.4 | 21.7 | 85  | N/A  | S |
| RO T1D A3 | Male   | Not tested | 3 | <b>0.1576</b> | <b>0.4249</b> | 0.0124        | <b>0.424</b>  | 19.2 | 21.7 | 90  | N/A  | S |
| RO T1D A4 | Male   | Not tested | 3 | <b>0.1602</b> | <b>1.0131</b> | 0.0052        | <b>0.448</b>  | 20.2 | 21.7 | 91  | 26.2 | S |
| RO T1D A5 | Male   | Not tested | 3 | <b>0.3064</b> | <b>0.8593</b> | 0.007         | <b>0.467</b>  | 21.3 | 21.7 | 123 | 28.1 | S |
| RO T1D A6 | Male   | 5.5        | 4 | <b>0.2441</b> | <b>1.1301</b> | <b>0.8804</b> | <b>0.443</b>  | 21.9 | 21.7 | 185 | 27.2 | S |
| RO T1D B1 | Female | Not tested | 1 | 0.059         | <b>0.01</b>   | 0.0175        | 0.0022        | 7.5  | 9.0  | 94  | 16.9 | S |
| RO T1D B2 | Female | Not tested | 2 | <b>0.1518</b> | <b>0.2252</b> | 0.038         | -0.0013       | 8.7  | 9.0  | 98  | N/A  | S |
| RO T1D B3 | Female | 6.6        | 3 | <b>0.1026</b> | <b>1.0284</b> | <b>0.1886</b> | -0.0007       | 9.2  | 9.0  | 142 | 16.4 | S |
| RO T1D B4 | Female | 6.8        | 2 | 0.0326        | <b>0.1231</b> | <b>0.5699</b> | -0.006        | 10.1 | 9.0  | 191 | 16.3 | S |
| RO T1D E1 | Male   | Not tested | 4 | <b>0.2374</b> | <b>0.1123</b> | <b>0.181</b>  | <b>0.0518</b> | 12.9 | 19.3 | 124 | 16.1 | S |
| RO T1D E2 | Male   | Not tested | 3 | <b>0.1358</b> | <b>0.1238</b> | <b>0.0865</b> | 0.0045        | 13.9 | 19.3 | 101 | N/A  | S |
| RO T1D E3 | Male   | Not tested | 3 | <b>0.1126</b> | <b>0.0899</b> | <b>0.1222</b> | -0.001        | 15.0 | 19.3 | 106 | N/A  | S |
| RO T1D E4 | Male   | Not tested | 3 | <b>0.1613</b> | <b>0.0838</b> | <b>0.0939</b> | 0.011         | 15.4 | 19.3 | 107 | 19.5 | S |
| RO T1D E5 | Male   | Not tested | 3 | <b>0.0849</b> | <b>0.0505</b> | <b>0.0817</b> | 0.004         | 15.9 | 19.3 | 95  | 20.0 | S |
| RO T1D E6 | Male   | Not tested | 3 | <b>0.1231</b> | <b>0.0852</b> | <b>0.054</b>  | -0.006        | 16.4 | 19.3 | 112 | N/A  | S |
| RO T1D E7 | Male   | Not tested | 3 | <b>0.0709</b> | <b>0.1258</b> | <b>0.0847</b> | -0.001        | 16.9 | 19.3 | 139 | N/A  | S |
| RO T1D E8 | Male   | Not tested | 1 | 0.0507        | <b>0.0299</b> | 0.04          | -0.004        | 18.0 | 19.3 | 144 | 21.0 | S |
| RO T1D F1 | Male   | Not tested | 4 | <b>1.7759</b> | <b>0.0407</b> | <b>0.1657</b> | <b>1.242</b>  | 4.2  | 6.9  | 72  | N/A  | S |
| RO T1D F2 | Male   | Not tested | 3 | <b>0.8103</b> | 0.0032        | <b>0.0878</b> | <b>0.769</b>  | 4.6  | 6.9  | 94  | 18.5 | S |
| RO T1D F3 | Male   | Not tested | 4 | <b>0.6668</b> | <b>0.356</b>  | <b>0.1233</b> | <b>1.254</b>  | 5.4  | 6.9  | 104 | 18.1 | S |
| RO T1D F4 | Male   | Not tested | 4 | <b>0.5901</b> | <b>0.9015</b> | <b>0.1394</b> | <b>1.325</b>  | 5.9  | 6.9  | 116 | N/A  | S |
| RO T1D F5 | Male   | Not tested | 4 | <b>0.0934</b> | <b>0.229</b>  | <b>0.1706</b> | <b>1.178</b>  | 7.0  | 6.9  | 118 | 16.8 | S |
| RO T1D F6 | Male   | 6          | 4 | <b>0.1349</b> | <b>0.2102</b> | <b>2.9047</b> | <b>0.522</b>  | 7.7  | 6.9  | 131 | 19.5 | S |
| RO T1D D1 | Female | Not tested | 0 | -0.002        | -0.0054       | 0.0017        | -0.005        | 10.4 | 17.4 | 119 | 25.8 | S |
| RO T1D D2 | Female | Not tested | 0 | 0.0312        | -0.0014       | 0             | -0.007        | 12.4 | 17.4 | 90  | N/A  | S |
| RO T1D D3 | Female | Not tested | 0 | 0.0026        | 0.0015        | 0.0111        | -0.005        | 13.4 | 17.4 | 88  | N/A  | S |
| RO T1D D4 | Female | Not tested | 3 | <b>0.8954</b> | <b>0.431</b>  | 0.0128        | <b>0.271</b>  | 14.4 | 17.4 | 105 | N/A  | S |
| RO T1D D5 | Female | Not tested | 3 | <b>1.2523</b> | <b>0.6469</b> | 0.0028        | <b>0.2157</b> | 14.9 | 17.4 | 90  | N/A  | S |
| RO T1D D6 | Female | Not tested | 3 | <b>1.1303</b> | <b>1.0491</b> | -0.0088       | <b>0.3655</b> | 15.5 | 17.4 | 110 | N/A  | S |
| RO T1D D7 | Female | Not tested | 3 | <b>0.7322</b> | <b>0.9755</b> | 0.0081        | <b>0.4358</b> | 16.0 | 17.4 | 116 | 30.5 | S |
| RO T1D D8 | Female | 7.9        | 4 | <b>0.7192</b> | <b>1.0327</b> | <b>0.0932</b> | <b>0.4991</b> | 17.6 | 17.4 | 89  | N/A  | S |

**Longitudinal Auto-antibody-positive (AA+) High HLA Risk Sibling sample series**

|            |        |            |   |               |               |               |               |      |     |      |   |
|------------|--------|------------|---|---------------|---------------|---------------|---------------|------|-----|------|---|
| AA+ HRS A1 | Male   | Not tested | 4 | <b>0.6342</b> | <b>0.3731</b> | <b>0.0689</b> | <b>0.7214</b> | 14.0 | 93  | 18.7 | S |
| AA+ HRS A2 | Male   | Not tested | 4 | <b>0.6337</b> | <b>0.17</b>   | <b>0.0857</b> | <b>0.744</b>  | 15.1 | 88  | N/A  | S |
| AA+ HRS A3 | Male   | Not tested | 4 | <b>1.0194</b> | <b>0.5787</b> | <b>0.0575</b> | <b>0.8022</b> | 16.0 | 82  | N/A  | S |
| AA+ HRS A4 | Male   | Not tested | 4 | <b>0.8829</b> | <b>0.4392</b> | <b>0.1425</b> | <b>0.794</b>  | 17.1 | 58  | N/A  | S |
| AA+ HRS A5 | Male   | Not tested | 3 | <b>0.2034</b> | <b>0.1397</b> | 0.0028        | <b>0.936</b>  | 19.5 | 79  | 22.5 | S |
| AA+ HRS B1 | Female | Not tested | 3 | 0.0155        | <b>0.024</b>  | <b>0.1733</b> | <b>0.3372</b> | 13.4 | 66  | 17.0 | S |
| AA+ HRS B2 | Female | Not tested | 2 | <b>0.4579</b> | <b>0.5608</b> | 0             | N/A           | 14.0 | 87  | N/A  | S |
| AA+ HRS B3 | Female | Not tested | 3 | <b>0.5105</b> | <b>0.3812</b> | 0             | <b>0.04</b>   | 14.7 | 93  | N/A  | S |
| AA+ HRS B4 | Female | Not tested | 2 | <b>0.5204</b> | <b>0.2861</b> | 0.0113        | 0.025         | 15.8 | 81  | N/A  | S |
| AA+ HRS B5 | Female | Not tested | 3 | <b>0.7481</b> | <b>0.2629</b> | 0.0087        | <b>0.055</b>  | 16.5 | 79  | 18.1 | S |
| AA+ HRS B6 | Female | Not tested | 2 | <b>0.972</b>  | <b>0.1117</b> | 0.0054        | 0.027         | 17.6 | 116 | N/A  | S |
| AA+ HRS B7 | Female | Not tested | 2 | <b>0.5992</b> | <b>0.1056</b> | -0.0022       | 0.009         | 18.7 | 137 | 18.4 | S |
| AA+ HRS B8 | Female | Not tested | 2 | <b>0.4692</b> | <b>0.0451</b> | 0             | 0.005         | 19.7 | 147 | N/A  | S |
| AA+ HRS C1 | Male   | Not tested | 1 | 0.0544        | 0.0047        | <b>0.1241</b> | -0.01         | 9.2  | 62  | 16.1 | S |
| AA+ HRS C2 | Male   | Not tested | 1 | <b>0.1193</b> | -0.0063       | 0.0067        | -0.0045       | 9.8  | 88  | N/A  | S |
| AA+ HRS C3 | Male   | Not tested | 1 | <b>0.0922</b> | -0.0001       | 0.0134        | 0.006         | 11.0 | 78  | N/A  | S |
| AA+ HRS C4 | Male   | Not tested | 2 | <b>0.1727</b> | -0.0012       | -0.0018       | <b>0.158</b>  | 11.5 | 82  | 16.0 | S |
| AA+ HRS C5 | Male   | Not tested | 2 | <b>0.1212</b> | 0             | 0.0031        | <b>0.338</b>  | 12.0 | 97  | 16.3 | S |
| AA+ HRS C6 | Male   | Not tested | 2 | <b>0.0973</b> | 0.0008        | 0.0052        | <b>0.372</b>  | 12.7 | 82  | N/A  | S |
| AA+ HRS C7 | Male   | Not tested | 2 | 0.0305        | <b>0.5402</b> | 0.0036        | <b>0.472</b>  | 14.2 | 81  | 18.1 | S |
| AA+ HRS E1 | Female | Not tested | 0 | -0.0058       | 0.0017        | 0.024         | -0.007        | 12.6 | 99  | 31.2 | S |
| AA+ HRS E2 | Female | Not tested | 2 | -0.0041       | <b>0.0038</b> | <b>0.2394</b> | -0.006        | 13.6 | 77  | N/A  | S |
| AA+ HRS E3 | Female | Not tested | 1 | -0.0055       | 0.0007        | <b>0.3763</b> | -0.011        | 14.6 | 94  | N/A  | S |
| AA+ HRS E4 | Female | Not tested | 1 | -0.0035       | -0.0016       | <b>0.3121</b> | -0.0081       | 15.7 | 104 | N/A  | S |
| AA+ HRS E5 | Female | Not tested | 1 | -0.0053       | -0.0005       | <b>0.4751</b> | -0.006        | 16.6 | 86  | N/A  | S |
| AA+ HRS F1 | Male   | Not tested | 1 | 0.0034        | -0.0013       | <b>0.1564</b> | -0.002        | 11.3 | 85  | 18.9 | S |
| AA+ HRS F2 | Male   | Not tested | 1 | -0.0031       | -0.0078       | <b>0.1303</b> | -0.003        | 12.4 | 78  | N/A  | S |
| AA+ HRS F3 | Male   | Not tested | 0 | 0.0024        | -0.0009       | 0.0253        | -0.0019       | 13.3 | 84  | N/A  | S |
| AA+ HRS F4 | Male   | Not tested | 0 | 0.0033        | 0.0001        | 0.0259        | 0.0021        | 14.3 | 105 | N/A  | S |
| AA+ HRS G1 | Female | Not tested | 0 | 0.0045        | -0.001        | -0.0022       | -0.01         | 7.3  | 110 | 22.3 | S |
| AA+ HRS G2 | Female | Not tested | 0 | -0.003        | -0.002        | -0.0052       | -0.005        | 8.3  | 100 | N/A  | S |

|            |        |            |   |               |               |               |               |      |     |            |   |
|------------|--------|------------|---|---------------|---------------|---------------|---------------|------|-----|------------|---|
| AA+ HRS G3 | Female | Not tested | 0 | -0.0054       | -0.0006       | -0.0041       | -0.007        | 9.4  | 85  | N/A        | S |
| AA+ HRS G4 | Female | Not tested | 1 | -0.011        | -0.0038       | <b>0.0622</b> | -0.0087       | 10.4 | 147 | N/A        | S |
| AA+ HRS G5 | Female | Not tested | 0 | 0.0007        | -0.0015       | 0.0211        | -0.0067       | 11.3 | 93  | N/A        | S |
| AA+ HRS G6 | Female | Not tested | 0 | -0.0066       | -0.0007       | 0.0158        | -0.0072       | 12.3 | 80  | 26.3       | S |
| AA+ HRS H1 | Female | Not tested | 2 | 0.0143        | <b>0.0505</b> | 0.0166        | <b>0.7273</b> | 12.0 | 108 | 18.2       | S |
| AA+ HRS H2 | Female | Not tested | 2 | 0.0039        | <b>0.0091</b> | -0.0022       | <b>0.3048</b> | 13.8 | 74  | N/A        | S |
| AA+ HRS H3 | Female | Not tested | 1 | 0.0127        | 0.0021        | 0.0004        | <b>0.114</b>  | 15.1 | 70  | N/A        | S |
| AA+ HRS H4 | Female | Not tested | 0 | 0.0128        | 0.0011        | 0.0236        | 0.029         | 16.0 | 101 | 23.0       | S |
| AA+ HRS H5 | Female | Not tested | 0 | 0.0108        | -0.0002       | 0             | 0.026         | 16.9 | 94  | 23.8       | S |
| AA+ HRS I1 | Female | Not tested | 1 | 0.012         | 0.0003        | <b>0.1019</b> | -0.0065       | 2.1  | 93  | 18.0       | S |
| AA+ HRS I2 | Female | Not tested | 1 | 0.0009        | 0.0034        | <b>0.1403</b> | -0.0072       | 2.6  | 87  | N/A        | S |
| AA+ HRS I3 | Female | Not tested | 2 | <b>0.0859</b> | -0.0011       | <b>2.045</b>  | -0.0039       | 3.2  | 91  | N/A        | S |
| AA+ HRS I4 | Female | Not tested | 0 | -0.0041       | -0.0019       | 0.0058        | -0.006        | 4.4  | 76  | N/A        | S |
| AA+ HRS I5 | Female | Not tested | 0 | -0.0084       | 0.0003        | 0.007         | -0.006        | 5.4  | 80  | N/A        | S |
| AA+ HRS I6 | Female | Not tested | 0 | -0.002        | -0.0004       | -0.0059       | -0.009        | 7.8  | 85  | N/A        | S |
| AA+ HRS I7 | Female | Not tested | 0 | -0.0074       | -0.0028       | -0.0042       | -0.0084       | 9.6  | 85  | N/A        | S |
| AA+ HRS I8 | Female | Not tested | 0 | 0.0003        | -0.0001       | 0.0078        | -0.0094       | 12.1 | 93  | 19.5       | S |
| AA+ HRS J1 | Male   | Not tested | 1 | 0.02          | <b>0.0144</b> | 0             | 0.0091        | 5.4  | 76  | 15.3       | S |
| AA+ HRS J2 | Male   | Not tested | 1 | 0.0169        | <b>0.0088</b> | -0.0019       | 0.003         | 6.4  | 80  | N/A        | S |
| AA+ HRS J3 | Male   | Not tested | 1 | 0.023         | <b>0.0081</b> | 0.0026        | 0.012         | 7.4  | 106 | <b>N/A</b> | S |
| AA+ HRS J4 | Male   | Not tested | 0 | 0.0184        | 0.005         | 0.0134        | 0.012         | 8.4  | 82  | N/A        | S |
| AA+ HRS J5 | Male   | Not tested | 0 | 0.0016        | -0.0001       | 0.0048        | -0.0036       | 12.4 | 83  | N/A        | S |
| AA+ HRS J6 | Male   | Not tested | 0 | 0.0016        | -0.0001       | 0.0055        | -0.0085       | 14.4 | N/A | N/A        | S |

**Longitudinal Auto-antibody-negative (AA-) High HLA Risk Sibling sample series**

|            |        |            |   |         |         |         |         |      |     |      |   |
|------------|--------|------------|---|---------|---------|---------|---------|------|-----|------|---|
| AA- HRS A1 | Male   | Not tested | 0 | -0.0109 | 0       | 0.0022  | -0.0082 | 10.4 | 117 | 18.8 | S |
| AA- HRS A2 | Male   | Not tested | 0 | 0.0083  | -0.0001 | 0.0044  | -0.002  | 15.3 | 87  | 19.9 | S |
| AA- HRS A3 | Male   | Not tested | 0 | -0.0014 | -0.001  | 0.0022  | -0.007  | 16.5 | 60  | N/A  | S |
| AA- HRS A4 | Male   | Not tested | 0 | -0.0043 | -0.0011 | 0.0118  | -0.008  | 17.6 | 88  | N/A  | S |
| AA- HRS A5 | Male   | Not tested | 0 | -0.0048 | 0       | 0.0043  | -0.0045 | 18.9 | 109 | N/A  | S |
| AA- HRS B1 | Female | Not tested | 0 | 0.0028  | -0.0005 | 0.0095  | 0.001   | 2.2  | 82  | 17.2 | S |
| AA- HRS B2 | Female | Not tested | 0 | 0.0154  | -0.0008 | 0       | -0.01   | 3.1  | 123 | N/A  | S |
| AA- HRS B3 | Female | Not tested | 0 | 0.0071  | -0.0012 | 0.0037  | -0.002  | 4.1  | 92  | N/A  | S |
| AA- HRS B4 | Female | Not tested | 0 | 0.0159  | -0.0023 | 0.0054  | -0.0021 | 6.1  | 79  | 13.4 | S |
| AA- HRS C1 | Female | Not tested | 0 | 0.0118  | -0.0017 | 0.0027  | 0.012   | 14.7 | 99  | 19.2 | S |
| AA- HRS C2 | Female | Not tested | 0 | 0.0085  | 0.0007  | 0.0035  | 0.003   | 15.7 | 94  | N/A  | S |
| AA- HRS C3 | Female | Not tested | 0 | 0.0076  | -0.0012 | 0.0112  | -0.002  | 16.6 | 66  | N/A  | S |
| AA- HRS C4 | Female | Not tested | 0 | 0.0065  | -0.0019 | -0.0077 | 0.0037  | 17.7 | 96  | N/A  | S |
| AA- HRS C5 | Female | Not tested | 0 | 0.0053  | -0.0014 | 0.0054  | -0.0021 | 18.6 | 83  | N/A  | S |
| AA- HRS D1 | Female | Not tested | 0 | 0.0141  | 0.0027  | 0.0076  | -0.01   | 14.8 | 92  | 38.3 | S |
| AA- HRS D2 | Female | Not tested | 0 | 0.0053  | -0.0006 | 0.0091  | -0.007  | 16.4 | 83  | N/A  | S |
| AA- HRS D3 | Female | Not tested | 0 | 0.0029  | -0.0012 | -0.0026 | -0.0073 | 17.4 | 77  | N/A  | S |
| AA- HRS D4 | Female | Not tested | 0 | 0.0124  | 0.0006  | 0       | -0.0041 | 18.4 | 93  | N/A  | S |
| AA- HRS E2 | Female | Not tested | 0 | 0.0122  | 0.0043  | 0.0017  | -0.003  | 7.1  | 73  | N/A  | S |
| AA- HRS E3 | Female | Not tested | 0 | 0.0046  | -0.0009 | 0.003   | -0.004  | 8.1  | 86  | N/A  | S |
| AA- HRS E4 | Female | Not tested | 0 | 0.0051  | -0.0021 | -0.0037 | -0.0026 | 9.1  | 79  | N/A  | S |
| AA- HRS E5 | Female | Not tested | 0 | 0.0055  | -0.0001 | 0       | -0.0043 | 10.1 | 97  | N/A  | S |
| AA- HRS F1 | Female | Not tested | 0 | 0.0268  | -0.0035 | -0.0086 | -0.001  | 7.3  | 81  | 13.6 | S |
| AA- HRS F2 | Female | Not tested | 0 | 0.0123  | -0.0019 | 0.0035  | -0.008  | 9.3  | 82  | N/A  | S |
| AA- HRS F3 | Female | Not tested | 0 | 0.0154  | -0.0001 | -0.0068 | 0.001   | 10.3 | 80  | N/A  | S |
| AA- HRS F4 | Female | Not tested | 0 | 0.0066  | -0.0024 | -0.0128 | -0.0033 | 11.3 | 89  | N/A  | S |
| AA- HRS F5 | Female | Not tested | 0 | 0.0298  | -0.0001 | 0.016   | -0.0034 | 12.3 | 84  | 17.9 | S |
| AA- HRS F6 | Female | Not tested | 0 | 0.0117  | -0.0001 | 0.0036  | -0.0045 | 13.3 | 102 | N/A  | S |
| AA- HRS G1 | Female | Not tested | 0 | 0.0073  | -0.0011 | -0.0048 | -0.001  | 5.5  | 80  | 15.4 | S |
| AA- HRS G2 | Female | Not tested | 0 | 0.0212  | 0.0014  | 0.0044  | -0.005  | 6.7  | 132 | N/A  | S |
| AA- HRS G3 | Female | Not tested | 0 | -0.0015 | -0.0005 | 0.0027  | -0.003  | 8.0  | 99  | N/A  | S |
| AA- HRS G4 | Female | Not tested | 0 | -0.0021 | -0.0032 | 0.0053  | -0.0041 | 11.1 | 94  | 18.4 | S |
| AA- HRS H1 | Male   | Not tested | 0 | 0       | -0.001  | 0.033   | -0.011  | 2.9  | 83  | 16.6 | S |
| AA- HRS H2 | Male   | Not tested | 0 | 0.0004  | -0.001  | 0.0062  | -0.008  | 5.0  | 80  | N/A  | S |
| AA- HRS H3 | Male   | Not tested | 0 | -0.0014 | -0.0042 | 0.0113  | -0.007  | 6.7  | 91  | N/A  | S |
| AA- HRS H4 | Male   | Not tested | 0 | 0.0011  | -0.0004 | 0.0123  | -0.032  | 9.2  | 97  | N/A  | S |
| AA- HRS I1 | Male   | Not tested | 0 | 0.0088  | 0.0012  | -0.0032 | -0.0028 | 2.1  | 99  | 14.8 | S |
| AA- HRS I2 | Male   | Not tested | 0 | -0.0019 | -0.0011 | 0.0096  | -0.005  | 6.0  | 83  | N/A  | S |
| AA- HRS I3 | Male   | Not tested | 0 | 0.0018  | -0.0006 | -0.0104 | 0.002   | 7.1  | 90  | 15.1 | S |
| AA- HRS I4 | Male   | Not tested | 0 | -0.0073 | -0.001  | -0.0018 | 0.0081  | 8.0  | 78  | 15.2 | S |
| AA- HRS I5 | Male   | Not tested | 0 | -0.0021 | -0.0024 | 0.0143  | 0       | 9.1  | 89  | N/A  | S |
| AA- HRS I6 | Male   | Not tested | 0 | 0.01    | -0.0013 | 0.0286  | -0.0077 | 11.2 | N/A | N/A  | S |
| AA- HRS J1 | Male   | Not tested | 0 | 0.0145  | -0.0003 | -0.0017 | 0.001   | 3.8  | 94  | 15.1 | S |
| AA- HRS J2 | Male   | Not tested | 0 | 0.0107  | 0.0018  | 0.0096  | -0.006  | 5.8  | 118 | N/A  | S |
| AA- HRS J3 | Male   | Not tested | 0 | -0.0048 | 0.0011  | -0.0029 | -0.006  | 6.7  | 85  | N/A  | S |
| AA- HRS J4 | Male   | Not tested | 0 | -0.0047 | 0.0022  | 0.0036  | -0.009  | 8.1  | 98  | N/A  | S |
| AA- HRS J5 | Male   | Not tested | 0 | 0.0008  | -0.0018 | -0.0101 | -0.0022 | 8.9  | 89  | 14.8 | S |
| AA- HRS J6 | Male   | Not tested | 0 | -0.0017 | 0       | 0.0023  | -0.0094 | 10.0 | 86  | N/A  | S |
| AA- HRS J7 | Male   | Not tested | 0 | -0.0016 | -0.0004 | 0.0032  | -0.0201 | 11.4 | N/A | N/A  | S |
| AA- HRS K1 | Male   | Not tested | 0 | 0.0132  | 0.0002  | -0.0017 | -0.005  | 2.2  | 86  | 17.0 | S |
| AA- HRS K2 | Male   | Not tested | 0 | 0.0168  | 0.0003  | -0.0067 | -0.009  | 4.2  | 126 | N/A  | S |
| AA- HRS K3 | Male   | Not tested | 0 | 0.0001  | -0.0004 | 0       | -0.007  | 5.1  | 94  | N/A  | S |
| AA- HRS K4 | Male   | Not tested | 0 | -0.0042 | 0.0019  | 0.0072  | -0.01   | 6.5  | 96  | N/A  | S |
| AA- HRS K5 | Male   | Not tested | 0 | -0.0016 | -0.0031 | -0.0101 | -0.0061 | 7.2  | 86  | 15.1 | S |
| AA- HRS K6 | Male   | Not tested | 0 | -0.0055 | -0.0032 | -0.0035 | -0.0072 | 8.4  | 94  | N/A  | S |
| AA- HRS K7 | Male   | Not tested | 0 | -0.0034 | -0.0013 | 0.0011  | -0.0286 | 9.8  | N/A | N/A  | S |
| AA- HRS L1 | Female | Not tested | 0 | 0.0042  | -0.0014 | 0       | -0.0023 | 3.1  | 70  | 18.1 | S |
| AA- HRS L2 | Female | Not tested | 0 | 0.0002  | -0.0104 | -0.0027 | -0.006  | 4.1  | 66  | N/A  | S |
| AA- HRS L3 | Female | Not tested | 0 | 0.0216  | 0.0005  | 0.0067  | -0.001  | 6.0  | 75  | N/A  | S |
| AA- HRS L4 | Female | Not tested | 0 | 0.0069  | -0.0004 | 0       | 0.022   | 7.2  | 75  | N/A  | S |

**Longitudinal Auto-antibody-negative (AA-) Low HLA Risk Sibling sample series**

|            |        |            |   |         |         |        |         |      |    |      |   |
|------------|--------|------------|---|---------|---------|--------|---------|------|----|------|---|
| AA- LRS B1 | Female | Not tested | 0 | -0.0066 | -0.0028 | 0      | -0.0066 | 5.5  | 94 | 17.5 | S |
| AA- LRS B2 | Female | Not tested | 0 | 0.0116  | -0.0017 | 0.0022 | -0.01   | 8.8  | 72 | N/A  | S |
| AA- LRS B3 | Female | Not tested | 0 | -0.0056 | -0.0092 | 0.0106 | -0.009  | 10.2 | 69 | N/A  | S |
| AA- LRS B4 | Female | Not tested | 0 | -0.0024 | -0.0005 | 0.0106 | -0.0035 | 14.3 | 70 | N/A  | S |
| AA- LRS C1 | Male   | Not tested | 0 | -0.0101 | -0.0004 | -0.002 | 0.001   | 4.5  | 78 | 14.6 | S |

|            |        |            |   |         |         |         |         |      |     |      |   |
|------------|--------|------------|---|---------|---------|---------|---------|------|-----|------|---|
| AA- LRS C2 | Male   | Not tested | 0 | -0.0074 | -0.002  | 0.008   | -0.0027 | 9.9  | 96  | 15.8 | S |
| AA- LRS C3 | Male   | Not tested | 0 | -0.0029 | -0.0007 | -0.001  | 0.0009  | 10.8 | 98  | N/A  | S |
| AA- LRS C4 | Male   | Not tested | 0 | -0.0028 | -0.0009 | 0.0063  | -0.0059 | 11.8 | 99  | N/A  | S |
| AA- LRS C5 | Male   | Not tested | 0 | N/A     | N/A     | N/A     | N/A     | 12.8 | N/A | N/A  | S |
| AA- LRS D1 | Male   | Not tested | 0 | 0.0116  | -0.0019 | 0.0014  | -0.002  | 10.5 | 83  | 14.5 | S |
| AA- LRS D2 | Male   | Not tested | 0 | -0.0014 | -0.0019 | 0       | -0.001  | 12.5 | 91  | N/A  | S |
| AA- LRS D3 | Male   | Not tested | 0 | 0.0018  | -0.0002 | 0.0061  | 0.02    | 13.5 | 87  | N/A  | S |
| AA- LRS D4 | Male   | Not tested | 0 | -0.0106 | -0.0019 | -0.0059 | 0.0018  | 14.5 | 82  | N/A  | S |
| AA- LRS D5 | Male   | Not tested | 0 | -0.0043 | -0.0003 | 0.0079  | -0.0019 | 15.5 | 89  | 17.2 | S |
| AA- LRS D6 | Male   | Not tested | 0 | 0.0017  | -0.0001 | -0.0054 | 0.0032  | 16.5 | 93  | N/A  | S |
| AA- LRS E1 | Female | Not tested | 0 | 0.0059  | -0.0013 | -0.0112 | -0.008  | 6.3  | 118 | 17.5 | S |
| AA- LRS E2 | Female | Not tested | 0 | 0.0098  | 0.0001  | -0.0044 | -0.014  | 7.3  | 92  | N/A  | S |
| AA- LRS E3 | Female | Not tested | 0 | -0.0026 | -0.0004 | -0.0126 | -0.006  | 8.3  | 78  | N/A  | S |
| AA- LRS E4 | Female | Not tested | 0 | -0.0137 | -0.0024 | -0.0118 | -0.0099 | 9.5  | 85  | N/A  | S |
| AA- LRS E5 | Female | Not tested | 0 | -0.0022 | -0.001  | -0.0083 | -0.0059 | 10.2 | 97  | N/A  | S |
| AA- LRS E6 | Female | Not tested | 0 | -0.0024 | -0.0006 | -0.0122 | -0.0008 | 11.6 | 101 | 18.8 | S |
| AA- LRS E7 | Female | Not tested | 0 | -0.0004 | -0.0007 | 0.0095  | 0.0066  | 12.3 | 99  | N/A  | S |
| AA- LRS F1 | Female | Not tested | 0 | 0.0003  | -0.0022 | -0.0078 | -0.006  | 7.4  | 84  | 16.7 | S |
| AA- LRS F2 | Female | Not tested | 0 | -0.0086 | -0.0017 | -0.0022 | -0.004  | 8.4  | 74  | N/A  | S |
| AA- LRS F3 | Female | Not tested | 0 | -0.0027 | -0.0037 | 0.007   | -0.0074 | 9.4  | 76  | N/A  | S |
| AA- LRS F4 | Female | Not tested | 0 | -0.0003 | -0.0005 | -0.0061 | -0.0086 | 10.6 | 87  | N/A  | S |
| AA- LRS F5 | Female | Not tested | 0 | -0.0023 | -0.0007 | 0.0096  | -0.0029 | 11.7 | 84  | N/A  | S |
| AA- LRS G1 | Female | Not tested | 0 | 0.02    | -0.002  | 0       | 0.006   | 2.6  | 85  | 15.1 | S |
| AA- LRS G2 | Female | Not tested | 0 | -0.0048 | -0.0012 | -0.0018 | -0.0019 | 7.1  | 81  | 14.1 | S |
| AA- LRS G3 | Female | Not tested | 0 | 0.002   | -0.0016 | 0.0023  | 0.004   | 7.9  | 78  | N/A  | S |
| AA- LRS G4 | Female | Not tested | 0 | N/A     | N/A     | N/A     | N/A     | 10.0 | N/A | N/A  | S |



Supplemental Table 2: 2422 Regulated probe sets from Cross Sectional Studies (a sortable Excel Spreadsheet with expression levels and statistics for each comparison is available upon request)

| Probeset ID  | Gene Symbol   | Gene Title                                                        | Mean LRS n=42 | Mean ROT1D n=47 | Mean HRS n=30 | Mean uHC n=44 | Fig1a/b Cross Sect ROT1D: uHC n=1383 | Fig1d/e 4way Venn 1.125 Fold Filter n_total=1374 | Fig1e LRS 575 138↑=1 437↓=-1 | Fig1e ROT1D 128 36↑=1 92↓=-1 | Fig1e HRS 156 84↑=1 72↓=-1 | Fig1e uHC 647 532↑=1 115↓=-1 | HRS: LRS 612 1= (Log2R≥ 0.263 && FDR≤0.2) | ROT1D: uHC 762 1= (Log2R≥ 0.263 && FDR≤0.2) | ROT1D: HRS 261 1= (Log2R≥ 0.263 && FDR≤0.2) | ROT1D: LRS 468 1= (Log2R≥ 0.263 && FDR≤0.2) | HRS: uHC 635 1= (Log2R≥ 0.263 && FDR≤0.2) | LRS: uHC 1339 1= (Log2R≥ 0.263 && FDR≤0.2) |
|--------------|---------------|-------------------------------------------------------------------|---------------|-----------------|---------------|---------------|--------------------------------------|--------------------------------------------------|------------------------------|------------------------------|----------------------------|------------------------------|-------------------------------------------|---------------------------------------------|---------------------------------------------|---------------------------------------------|-------------------------------------------|--------------------------------------------|
| 204470_at    | CXCL1         | chemokine (C-X-C motif) ligand 1 (melanoma growth stimulat        | 1.21          | 0.60            | 0.29          | -0.01         | 1                                    | 1                                                | 1                            | 0                            | 0                          | -1                           | 1                                         | 1                                           | 0                                           | 1                                           | 0                                         | 1                                          |
| 233011_at    | ANXA1         | Annexin A1                                                        | -0.09         | 0.44            | 0.22          | -0.15         | 1                                    | 1                                                | 0                            | 1                            | 0                          | 0                            | 0                                         | 1                                           | 0                                           | 1                                           | 0                                         | 0                                          |
| 1554997_a_at | PTGS2         | prostaglandin-endoperoxide synthase 2 (prostaglandin G/H syr      | 0.80          | 0.83            | 0.51          | 0.33          | 1                                    | 1                                                | 0                            | 0                            | 0                          | -1                           | 0                                         | 1                                           | 0                                           | 0                                           | 0                                         | 1                                          |
| 210367_s_at  | PTGES         | prostaglandin E synthase                                          | -0.59         | -0.76           | -0.92         | -1.24         | 1                                    | 1                                                | 1                            | 0                            | 0                          | -1                           | 0                                         | 1                                           | 0                                           | 0                                           | 0                                         | 1                                          |
| 235008_at    | ANKRD10       | ankyrin repeat domain 10                                          | -0.58         | -0.10           | -0.39         | -0.57         | 1                                    | 1                                                | 0                            | 1                            | 0                          | 0                            | 0                                         | 1                                           | 0                                           | 1                                           | 0                                         | 0                                          |
| 204112_s_at  | HNMT          | histamine N-methyltransferase                                     | -0.12         | -0.56           | -0.69         | -1.01         | 1                                    | 1                                                | 1                            | 0                            | 0                          | -1                           | 0                                         | 1                                           | 0                                           | 0                                           | 0                                         | 1                                          |
| 207850_at    | CXCL3         | chemokine (C-X-C motif) ligand 3                                  | 0.64          | 0.21            | -0.01         | -0.25         | 1                                    | 1                                                | 1                            | 0                            | 0                          | -1                           | 1                                         | 1                                           | 0                                           | 1                                           | 0                                         | 1                                          |
| 236495_at    | NAMPT         | nicotinamide phosphoribosyltransferase                            | -0.64         | -0.28           | -0.60         | -0.72         | 1                                    | 1                                                | 0                            | 1                            | 0                          | 0                            | 0                                         | 1                                           | 0                                           | 1                                           | 0                                         | 0                                          |
| 211924_s_at  | PLAUR         | plasminogen activator, urokinase receptor                         | -1.40         | -1.65           | -1.88         | -2.07         | 1                                    | 1                                                | 1                            | 0                            | 0                          | -1                           | 1                                         | 1                                           | 0                                           | 0                                           | 0                                         | 1                                          |
| 233314_at    | PTEN          | phosphatase and tensin homolog                                    | 0.34          | 0.68            | 0.37          | 0.29          | 1                                    | 1                                                | 0                            | 1                            | 0                          | 0                            | 0                                         | 1                                           | 0                                           | 0                                           | 0                                         | 0                                          |
| 218228_s_at  | TNKS2         | tankyrase, TRF1-interacting ankyrin-related ADP-ribose polym      | 1.23          | 1.28            | 1.23          | 0.90          | 1                                    | 1                                                | 0                            | 0                            | 0                          | -1                           | 0                                         | 1                                           | 0                                           | 0                                           | 1                                         | 1                                          |
| 228478_at    | ---           | ---                                                               | -0.23         | 0.29            | -0.03         | -0.10         | 1                                    | 1                                                | 0                            | 1                            | 0                          | 0                            | 0                                         | 1                                           | 1                                           | 1                                           | 0                                         | 0                                          |
| 230511_at    | CREM          | cAMP responsive element modulator                                 | -0.68         | -0.76           | -0.95         | -1.15         | 1                                    | 1                                                | 0                            | 0                            | 0                          | -1                           | 0                                         | 1                                           | 0                                           | 0                                           | 0                                         | 1                                          |
| 1569203_at   | CXCL2         | chemokine (C-X-C motif) ligand 2                                  | -0.59         | -0.90           | -1.01         | -1.26         | 1                                    | 1                                                | 1                            | 0                            | 0                          | -1                           | 1                                         | 1                                           | 0                                           | 1                                           | 0                                         | 1                                          |
| 242427_at    | WAC           | WW domain containing adaptor with coiled-coil                     | 0.08          | 0.51            | 0.33          | 0.15          | 1                                    | 1                                                | 0                            | 1                            | 0                          | 0                            | 0                                         | 1                                           | 0                                           | 1                                           | 0                                         | 0                                          |
| 207075_at    | NLRP3         | NLR family, pyrin domain containing 3                             | 0.45          | 0.23            | 0.03          | -0.12         | 1                                    | 1                                                | 1                            | 0                            | 0                          | 0                            | 1                                         | 1                                           | 0                                           | 0                                           | 0                                         | 1                                          |
| 221345_at    | FFAR2         | free fatty acid receptor 2                                        | 0.84          | 0.51            | 0.46          | 0.17          | 1                                    | 1                                                | 1                            | 0                            | 0                          | -1                           | 1                                         | 1                                           | 0                                           | 1                                           | 1                                         | 1                                          |
| 201340_s_at  | ENC1          | ectodermal-neural cortex 1 (with BTB-like domain)                 | -0.50         | -0.36           | -0.44         | -0.69         | 1                                    | 1                                                | 0                            | 0                            | 0                          | -1                           | 0                                         | 1                                           | 0                                           | 0                                           | 0                                         | 0                                          |
| 204971_at    | CSTA          | cystatin A (stefin A)                                             | -0.25         | -0.45           | -0.59         | -0.76         | 1                                    | 1                                                | 1                            | 0                            | 0                          | -1                           | 1                                         | 1                                           | 0                                           | 0                                           | 0                                         | 1                                          |
| 205495_s_at  | GNLY          | granulysin                                                        | 0.53          | 0.50            | 0.55          | 0.20          | 1                                    | 1                                                | 0                            | 0                            | 0                          | -1                           | 0                                         | 1                                           | 0                                           | 0                                           | 1                                         | 1                                          |
| 206026_s_at  | TNFAIP6       | tumor necrosis factor, alpha-induced protein 6                    | -0.08         | -0.27           | -0.42         | -0.58         | 1                                    | 1                                                | 1                            | 0                            | 0                          | -1                           | 0                                         | 1                                           | 0                                           | 0                                           | 0                                         | 1                                          |
| 209774_x_at  | CXCL2         | chemokine (C-X-C motif) ligand 2                                  | 0.97          | 0.74            | 0.54          | 0.45          | 1                                    | 1                                                | 1                            | 0                            | 0                          | 0                            | 1                                         | 1                                           | 0                                           | 0                                           | 0                                         | 1                                          |
| 209967_s_at  | CREM          | cAMP responsive element modulator                                 | -0.40         | -0.44           | -0.55         | -0.74         | 1                                    | 1                                                | 0                            | 0                            | 0                          | -1                           | 0                                         | 1                                           | 0                                           | 0                                           | 0                                         | 1                                          |
| 1568830_at   | IRAK3         | interleukin-1 receptor-associated kinase 3                        | -0.61         | -0.29           | -0.51         | -0.59         | 1                                    | 1                                                | 0                            | 1                            | 0                          | 0                            | 0                                         | 1                                           | 0                                           | 1                                           | 0                                         | 0                                          |
| 216016_at    | NLRP3         | NLR family, pyrin domain containing 3                             | -0.19         | -0.17           | -0.19         | -0.46         | 1                                    | 1                                                | 0                            | 0                            | 0                          | -1                           | 0                                         | 1                                           | 0                                           | 0                                           | 1                                         | 1                                          |
| 222909_s_at  | BAG4          | BCL2-associated athanogene 4                                      | -0.30         | 0.17            | 0.06          | -0.12         | 1                                    | 1                                                | -1                           | 0                            | 0                          | 0                            | 1                                         | 1                                           | 0                                           | 1                                           | 0                                         | 0                                          |
| 224231_at    | PRO0471       | hypothetical LOC28994                                             | -0.20         | 0.27            | 0.00          | -0.01         | 1                                    | 1                                                | -1                           | 1                            | 0                          | 0                            | 0                                         | 1                                           | 1                                           | 1                                           | 0                                         | 0                                          |
| 39402_at     | IL1B          | interleukin 1, beta                                               | 0.52          | 0.25            | 0.14          | -0.04         | 1                                    | 1                                                | 1                            | 0                            | 0                          | -1                           | 1                                         | 1                                           | 0                                           | 1                                           | 0                                         | 1                                          |
| 201043_s_at  | ANP32A        | acidic (leucine-rich) nuclear phosphoprotein 32 family, membe     | 0.38          | 0.50            | 0.69          | 0.23          | 1                                    | 1                                                | 0                            | 0                            | 1                          | 0                            | 0                                         | 1                                           | 0                                           | 0                                           | 1                                         | 0                                          |
| 205067_at    | IL1B          | interleukin 1, beta                                               | 0.44          | 0.16            | 0.06          | -0.12         | 1                                    | 1                                                | 1                            | 0                            | 0                          | -1                           | 1                                         | 1                                           | 0                                           | 1                                           | 0                                         | 1                                          |
| 207388_s_at  | PTGES         | prostaglandin E synthase                                          | -0.28         | -0.42           | -0.41         | -0.70         | 1                                    | 1                                                | 0                            | 0                            | 0                          | -1                           | 0                                         | 1                                           | 0                                           | 0                                           | 1                                         | 1                                          |
| 218839_at    | HEY1          | hairly/enhancer-of-split related with YRPW motif 1                | 0.04          | -0.09           | -0.17         | -0.37         | 1                                    | 1                                                | 0                            | 0                            | 0                          | -1                           | 0                                         | 1                                           | 0                                           | 0                                           | 0                                         | 1                                          |
| 242163_at    | THRAP3        | thyroid hormone receptor associated protein 3                     | -0.89         | -0.38           | -0.38         | -0.66         | 1                                    | 1                                                | -1                           | 0                            | 0                          | 0                            | 1                                         | 1                                           | 0                                           | 1                                           | 1                                         | 0                                          |
| 206366_x_at  | XCL1          | chemokine (C motif) ligand 1                                      | 0.73          | 0.59            | 0.57          | 0.32          | 1                                    | 1                                                | 0                            | 0                            | 0                          | -1                           | 0                                         | 1                                           | 0                                           | 0                                           | 0                                         | 1                                          |
| 240626_at    | ---           | ---                                                               | 0.14          | 0.37            | 0.20          | 0.10          | 1                                    | 1                                                | 0                            | 1                            | 0                          | 0                            | 0                                         | 1                                           | 0                                           | 0                                           | 0                                         | 0                                          |
| 37145_at     | GNLY          | granulysin                                                        | 0.55          | 0.51            | 0.57          | 0.24          | 1                                    | 1                                                | 0                            | 0                            | 0                          | -1                           | 0                                         | 1                                           | 0                                           | 0                                           | 1                                         | 1                                          |
| 1569573_at   | AVEN          | apoptosis, caspase activation inhibitor                           | -0.17         | -0.23           | -0.21         | 0.03          | 1                                    | 1                                                | 0                            | 0                            | 0                          | 1                            | 0                                         | 1                                           | 0                                           | 0                                           | 0                                         | 0                                          |
| 1570409_x_at | ---           | ---                                                               | -0.85         | -0.85           | -0.80         | -0.59         | 1                                    | 1                                                | 0                            | 0                            | 0                          | 1                            | 0                                         | 1                                           | 0                                           | 0                                           | 0                                         | 1                                          |
| 1554152_a_at | OGDH          | oxoglutarate (alpha-ketoglutarate) dehydrogenase (lipoamide)      | -0.70         | -0.64           | -0.59         | -0.37         | 1                                    | 1                                                | 0                            | 0                            | 0                          | 1                            | 0                                         | 1                                           | 0                                           | 0                                           | 0                                         | 1                                          |
| 1557077_a_at | ---           | ---                                                               | -0.19         | -0.29           | -0.23         | -0.01         | 1                                    | 1                                                | 0                            | 0                            | 0                          | 1                            | 0                                         | 1                                           | 0                                           | 0                                           | 0                                         | 0                                          |
| 1557238_s_at | Setd5         | SET domain containing 5                                           | -0.28         | -0.26           | -0.26         | 0.00          | 1                                    | 1                                                | 0                            | 0                            | 0                          | 1                            | 0                                         | 1                                           | 0                                           | 0                                           | 1                                         | 1                                          |
| 1558078_at   | ---           | ---                                                               | -0.27         | -0.30           | -0.26         | -0.04         | 1                                    | 1                                                | 0                            | 0                            | 0                          | 1                            | 0                                         | 1                                           | 0                                           | 0                                           | 0                                         | 0                                          |
| 1558792_x_at | AP2A1         | Adaptor-related protein complex 2, alpha 1 subunit                | -0.13         | -0.21           | -0.16         | 0.06          | 1                                    | 1                                                | 0                            | 0                            | 0                          | 1                            | 0                                         | 1                                           | 0                                           | 0                                           | 0                                         | 0                                          |
| 1560014_s_at | PDXDC1        | pyridoxal-dependent decarboxylase domain containing 1             | -0.07         | -0.15           | -0.12         | 0.12          | 1                                    | 1                                                | 0                            | 0                            | 0                          | 1                            | 0                                         | 1                                           | 0                                           | 0                                           | 0                                         | 0                                          |
| 1560800_at   | ---           | ---                                                               | -0.81         | -1.06           | -0.79         | -0.79         | 1                                    | 1                                                | 0                            | -1                           | 0                          | 0                            | 0                                         | 1                                           | 0                                           | 0                                           | 0                                         | 0                                          |
| 1561128_at   | STK10         | serine/threonine kinase 10                                        | -0.27         | -0.36           | -0.31         | -0.09         | 1                                    | 1                                                | 0                            | 0                            | 0                          | 1                            | 0                                         | 1                                           | 0                                           | 0                                           | 0                                         | 0                                          |
| 1562481_at   | ---           | ---                                                               | -0.62         | -0.56           | -0.60         | -0.29         | 1                                    | 1                                                | 0                            | 0                            | 0                          | 1                            | 0                                         | 1                                           | 0                                           | 0                                           | 1                                         | 1                                          |
| 1563460_at   | ---           | ---                                                               | 0.01          | -0.04           | -0.02         | 0.22          | 1                                    | 1                                                | 0                            | 0                            | 0                          | 1                            | 0                                         | 1                                           | 0                                           | 0                                           | 0                                         | 0                                          |
| 1569189_at   | TTC9C         | tetratricopeptide repeat domain 9C                                | -0.14         | -0.19           | -0.21         | 0.08          | 1                                    | 1                                                | 0                            | 0                            | 0                          | 1                            | 0                                         | 1                                           | 0                                           | 0                                           | 1                                         | 0                                          |
| 202940_at    | WNK1          | WNK lysine deficient protein kinase 1                             | -0.12         | -0.33           | -0.15         | -0.06         | 1                                    | 1                                                | 0                            | -1                           | 0                          | 0                            | 0                                         | 1                                           | 0                                           | 0                                           | 0                                         | 0                                          |
| 205822_s_at  | HMGCS1        | 3-hydroxy-3-methylglutaryl-CoA synthase 1 (soluble)               | 0.13          | -0.05           | 0.18          | 0.22          | 1                                    | 1                                                | 0                            | -1                           | 0                          | 0                            | 0                                         | 1                                           | 0                                           | 0                                           | 0                                         | 0                                          |
| 206169_x_at  | ZC3H7B        | zinc finger CCHC-type containing 7B                               | 0.06          | 0.05            | 0.12          | 0.32          | 1                                    | 1                                                | 0                            | 0                            | 0                          | 1                            | 0                                         | 1                                           | 0                                           | 0                                           | 0                                         | 0                                          |
| 210985_s_at  | SP100         | SP100 nuclear antigen                                             | -0.93         | -0.89           | -0.86         | -0.62         | 1                                    | 1                                                | 0                            | 0                            | 0                          | 1                            | 0                                         | 1                                           | 0                                           | 0                                           | 0                                         | 1                                          |
| 217653_x_at  | TRPM6         | transient receptor potential cation channel, subfamily M, mem     | -0.08         | -0.14           | -0.04         | 0.13          | 1                                    | 1                                                | 0                            | 0                            | 0                          | 1                            | 0                                         | 1                                           | 0                                           | 0                                           | 0                                         | 0                                          |
| 228549_at    | TMEM63A       | transmembrane protein 63A                                         | 0.12          | 0.11            | 0.18          | 0.38          | 1                                    | 1                                                | 0                            | 0                            | 0                          | 1                            | 0                                         | 1                                           | 0                                           | 0                                           | 0                                         | 1                                          |
| 232161_x_at  | PTPN4         | protein tyrosine phosphatase, non-receptor type 4 (megakaryoc     | -0.24         | -0.23           | -0.28         | 0.04          | 1                                    | 1                                                | 0                            | 0                            | 0                          | 1                            | 0                                         | 1                                           | 0                                           | 0                                           | 1                                         | 1                                          |
| 232346_at    | LOC388692     | hypothetical LOC388692                                            | -0.05         | -0.10           | -0.08         | 0.17          | 1                                    | 1                                                | 0                            | 0                            | 0                          | 1                            | 0                                         | 1                                           | 0                                           | 0                                           | 0                                         | 0                                          |
| 232521_at    | PCSK7         | proprotein convertase subtilisin/kexin type 7                     | -0.05         | -0.11           | -0.13         | 0.15          | 1                                    | 1                                                | 0                            | 0                            | 0                          | 1                            | 0                                         | 1                                           | 0                                           | 0                                           | 1                                         | 0                                          |
| 233405_at    | Fip1l1        | FIP1 like 1 (S. cerevisiae)                                       | -0.36         | -0.25           | -0.28         | 0.02          | 1                                    | 1                                                | 0                            | 0                            | 0                          | 1                            | 0                                         | 1                                           | 0                                           | 0                                           | 1                                         | 1                                          |
| 235274_at    | ---           | ---                                                               | -0.17         | -0.16           | -0.21         | 0.11          | 1                                    | 1                                                | 0                            | 0                            | 0                          | 1                            | 0                                         | 1                                           | 0                                           | 0                                           | 1                                         | 1                                          |
| 236778_at    | Atrx          | alpha thalassemia/mental retardation syndrome X-linked (RAD       | -0.42         | -0.29           | -0.37         | -0.03         | 1                                    | 1                                                | 0                            | 0                            | 0                          | 1                            | 0                                         | 1                                           | 0                                           | 0                                           | 1                                         | 1                                          |
| 237878_at    | Map2k2 /// LC | mitogen-activated protein kinase kinase 2 pseudogene; mitoge      | -0.35         | -0.44           | -0.35         | -0.17         | 1                                    | 1                                                | 0                            | 0                            | 0                          | 1                            | 0                                         | 1                                           | 0                                           | 0                                           | 0                                         | 0                                          |
| 238913_at    | Cpsf6         | cleavage and polyadenylation specific factor 6, 68kDa             | -0.08         | -0.09           | -0.09         | 0.17          | 1                                    | 1                                                | 0                            | 0                            | 0                          | 1                            | 0                                         | 1                                           | 0                                           | 0                                           | 0                                         | 0                                          |
| 239751_at    | LOC100506860  | hypothetical LOC100506860                                         | -0.35         | -0.61           | -0.38         | -0.34         | 1                                    | 1                                                | 0                            | -1                           | 0                          | 0                            | 0                                         | 1                                           | 0                                           | 0                                           | 0                                         | 0                                          |
| 239893_at    | MCTP2         | multiple C2 domains, transmembrane 2                              | 0.05          | 0.09            | 0.08          | 0.36          | 1                                    | 1                                                | 0                            | 0                            | 0                          | 1                            | 0                                         | 1                                           | 0                                           | 0                                           | 1                                         | 1                                          |
| 242740_at    | ---           | ---                                                               | -0.49         | -0.44           | -0.39         | -0.17         | 1                                    | 1                                                | 0                            | 0                            | 0                          | 1                            | 0                                         | 1                                           | 0                                           | 0                                           | 0                                         | 1                                          |
| 242772_x_at  | ---           | ---                                                               | -0.41         | -0.33           | -0.52         | -0.06         | 1                                    | 1                                                | 0                            | 0                            | 0                          | 1                            | 0                                         | 1                                           | 0                                           | 0                                           | 1                                         | 1                                          |
| 242859_at    | tfcp2         | transcription factor CP2                                          | -0.34         | -0.41           | -0.36         | -0.14         | 1                                    | 1                                                | 0                            | 0                            | 0                          | 1                            | 0                                         | 1                                           | 0                                           | 0                                           | 0                                         | 0                                          |
| 243031_at    | rtn4          | reticulon 4                                                       | -0.75         | -0.71           | -0.62         | -0.43         | 1                                    | 1                                                | 0                            | 0                            | 0                          | 1                            | 0                                         | 1                                           | 0                                           | 0                                           | 0                                         | 1                                          |
| 243899_at    | ARL17A        | ADP-ribosylation factor-like 17A                                  | -0.30         | -0.37           | -0.29         | -0.11         | 1                                    | 1                                                | 0                            | 0                            | 0                          | 1                            | 0                                         | 1                                           | 0                                           | 0                                           | 0                                         | 0                                          |
| 1554670_at   | GGA1          | golgi-associated, gamma adaptin ear containing, ARF binding p     | -0.84         | -0.86           | -0.86         | -0.58         | 1                                    | 1                                                | 0                            | 0                            | 0                          | 1                            | 0                                         | 1                                           | 0                                           | 0                                           | 1                                         | 0                                          |
| 1556621_a_at | CHFR          | checkpoint with forkhead and ring finger domains                  | -0.54         | -0.54           | -0.43         | -0.26         | 1                                    | 1                                                | 0                            | 0                            | 0                          | 1                            | 0                                         | 1                                           | 0                                           | 0                                           | 0                                         | 1                                          |
| 1556931_at   | CDC42P2 /// C | cell division cycle 42 (GTP binding protein, 25kDa); cell divisio | -0.56         | -0.52           | -0.41         | -0.23         | 1                                    | 1                                                | 0                            | 0                            | 0                          | 1                            | 0                                         | 1                                           | 0                                           | 0                                           | 0                                         | 1                                          |
| 1557828_a_at | C5orf28       | Chromosome 5 open reading frame 28                                | -0.03         | -0.11           | -0.05         | 0.18          | 1                                    | 1                                                | 0                            | 0                            | 0                          | 1                            | 0                                         | 1                                           | 0                                           | 0                                           | 0                                         | 0                                          |
| 1562316_at   | PIGU          | phosphatidylinositol glycan anchor biosynthesis, class U          | -0.17         | -0.36           | -0.18         | -0.07         | 1                                    | 1                                                | 0                            | -1                           | 0                          | 0                            | 0                                         | 1                                           | 0                                           | 0                                           | 0                                         | 0                                          |
| 1564093_at   | NEK1          | NIMA (never in mitosis gene a)-related kinase 1                   | -0.45         | -0.50           | -0.44         | -0.23         | 1                                    | 1                                                | 0                            | 0                            | 0                          | 1                            | 0                                         | 1                                           | 0                                           | 0                                           | 0                                         | 0                                          |
| 1565595_at   | Slc6a16       | solute carrier family 6, member 16                                | -0.13         | -0.10           | -0.06         | 0.18          | 1                                    | 1                                                | 0                            | 0                            | 0                          | 1                            | 0                                         | 1                                           | 0                                           | 0                                           | 0                                         | 1                                          |
| 1568943_at   | INPP5D        | inositol polyphosphate-5-phosphatase, 145kDa                      | -0.06         | -0.08           | 0.00          | 0.19          | 1                                    | 1                                                | 0                            | 0                            | 0                          | 1                            | 0                                         | 1                                           | 0                                           | 0                                           | 0                                         | 0                                          |
| 1569142_at   | TRIM13        | tripartite motif-containing 13                                    | -0.58         | -0.68           | -0.61         | -0.40         | 1                                    | 1                                                | 0                            | 0                            | 0                          | 1                            | 0                                         | 1                                           | 0                                           | 0                                           | 0                                         | 0                                          |
| 1569180_at   | ---           | ---                                                               | 0.05          | -0.01           | 0.03          | 0.27          | 1                                    | 1                                                | 0                            | 0                            | 0                          | 1                            |                                           |                                             |                                             |                                             |                                           |                                            |



|              |             |                                                                 |       |       |       |       |   |   |   |    |   |   |   |   |   |   |   |   |
|--------------|-------------|-----------------------------------------------------------------|-------|-------|-------|-------|---|---|---|----|---|---|---|---|---|---|---|---|
| 217671_at    | rfx3        | regulatory factor X, 3 (influences HLA class II expression)     | -0.04 | -0.11 | -0.11 | 0.18  | 1 | 1 | 0 | 0  | 0 | 1 | 0 | 1 | 0 | 0 | 1 | 0 |
| 232000_at    | TTC39B      | Tetratricopeptide repeat domain 39B                             | 0.09  | 0.12  | 0.17  | 0.41  | 1 | 1 | 0 | 0  | 0 | 1 | 0 | 1 | 0 | 0 | 0 | 1 |
| 233824_at    | ---         | ---                                                             | -0.93 | -1.01 | -1.08 | -0.72 | 1 | 1 | 0 | 0  | 0 | 1 | 0 | 1 | 0 | 0 | 1 | 0 |
| 233931_at    | zfr         | zinc finger RNA binding protein                                 | -0.66 | -0.72 | -0.73 | -0.43 | 1 | 1 | 0 | 0  | 0 | 1 | 0 | 1 | 0 | 0 | 1 | 0 |
| 237412_at    | BCAS3       | breast carcinoma amplified sequence 3                           | -0.16 | -0.24 | -0.14 | 0.04  | 1 | 1 | 0 | 0  | 0 | 1 | 0 | 1 | 0 | 0 | 0 | 0 |
| 239042_at    | TSR1        | TSR1, 20S rRNA accumulation, homolog (S. cerevisiae)            | -0.17 | -0.25 | -0.19 | 0.04  | 1 | 1 | 0 | 0  | 0 | 1 | 0 | 1 | 0 | 0 | 0 | 0 |
| 239809_at    | KLF7        | Kruppel-like factor 7 (ubiquitous)                              | -0.05 | -0.04 | -0.07 | 0.25  | 1 | 1 | 0 | 0  | 0 | 1 | 0 | 1 | 0 | 0 | 1 | 1 |
| 242176_at    | MEF2A       | Myocyte enhancer factor 2A                                      | -0.26 | -0.36 | -0.26 | -0.07 | 1 | 1 | 0 | 0  | 0 | 1 | 0 | 1 | 0 | 0 | 0 | 0 |
| 242440_at    | ---         | ---                                                             | -0.31 | -0.37 | -0.32 | -0.08 | 1 | 1 | 0 | 0  | 0 | 1 | 0 | 1 | 0 | 0 | 0 | 0 |
| 1552788_a_at | HELB        | helicase (DNA) B                                                | -0.23 | -0.41 | -0.20 | -0.10 | 1 | 1 | 0 | -1 | 0 | 0 | 0 | 1 | 0 | 0 | 0 | 0 |
| 1556828_at   | ---         | ---                                                             | 0.19  | -0.06 | 0.15  | 0.24  | 1 | 1 | 0 | -1 | 0 | 0 | 0 | 1 | 0 | 0 | 0 | 0 |
| 1557197_a_at | LGALS3      | lectin, galactoside-binding, soluble, 3                         | -2.21 | -2.23 | -2.33 | -1.93 | 1 | 1 | 0 | 0  | 0 | 1 | 0 | 1 | 0 | 0 | 1 | 1 |
| 1558569_at   | LOC10013154 | Hypothetical LOC100131541                                       | -0.33 | -0.44 | -0.39 | -0.14 | 1 | 1 | 0 | 0  | 0 | 1 | 0 | 1 | 0 | 0 | 0 | 0 |
| 1560386_at   | xpo1        | exportin 1 (CRM1 homolog, yeast)                                | -0.47 | -0.44 | -0.47 | -0.13 | 1 | 1 | 0 | 0  | 0 | 1 | 0 | 1 | 0 | 0 | 1 | 1 |
| 1560391_at   | pigl        | phosphatidylinositol glycan anchor biosynthesis, class L        | -0.12 | -0.14 | -0.27 | 0.16  | 1 | 1 | 0 | 0  | 0 | 1 | 0 | 1 | 0 | 0 | 1 | 1 |
| 1561600_at   | SSH2        | slingshot homolog 2 (Drosophila)                                | -0.05 | -0.15 | -0.06 | 0.15  | 1 | 1 | 0 | 0  | 0 | 1 | 0 | 1 | 0 | 0 | 0 | 0 |
| 1561660_at   | MCART6      | mitochondrial carrier triple repeat 6                           | 0.29  | 0.18  | 0.23  | 0.48  | 1 | 1 | 0 | 0  | 0 | 1 | 0 | 1 | 0 | 0 | 0 | 0 |
| 1569128_at   | C3orf38     | chromosome 3 open reading frame 38                              | -0.39 | -0.44 | -0.41 | -0.13 | 1 | 1 | 0 | 0  | 0 | 1 | 0 | 1 | 0 | 0 | 1 | 0 |
| 1570505_at   | ABCB4       | ATP-binding cassette, sub-family B (MDR/TAP), member 4          | -0.09 | -0.06 | 0.00  | 0.24  | 1 | 1 | 0 | 0  | 0 | 1 | 0 | 1 | 0 | 0 | 0 | 1 |
| 215070_x_at  | RABGAP1     | RAB GTPase activating protein 1                                 | -0.39 | -0.50 | -0.38 | -0.20 | 1 | 1 | 0 | 0  | 0 | 1 | 0 | 1 | 0 | 0 | 0 | 0 |
| 217701_x_at  | Atrx        | alpha thalassemia/mental retardation syndrome X-linked (RAD)    | -0.50 | -0.50 | -0.54 | -0.20 | 1 | 1 | 0 | 0  | 0 | 1 | 0 | 1 | 0 | 0 | 1 | 1 |
| 223814_at    | TRNT1       | tRNA nucleotidyl transferase, CCA-adding, 1                     | -0.19 | -0.43 | -0.23 | -0.13 | 1 | 1 | 0 | -1 | 0 | 0 | 0 | 1 | 0 | 0 | 0 | 0 |
| 231848_x_at  | ZNF207      | zinc finger protein 207                                         | -0.16 | -0.28 | -0.26 | 0.02  | 1 | 1 | 0 | 0  | 0 | 1 | 0 | 1 | 0 | 0 | 1 | 0 |
| 231886_at    | LOC10013482 | similar to hCG1739109                                           | -0.23 | -0.34 | -0.26 | -0.04 | 1 | 1 | 0 | 0  | 0 | 1 | 0 | 1 | 0 | 0 | 0 | 0 |
| 232002_at    | GPI         | glucose phosphate isomerase                                     | -0.04 | -0.17 | -0.14 | 0.13  | 1 | 1 | 0 | 0  | 0 | 1 | 0 | 1 | 0 | 0 | 1 | 0 |
| 232688_at    | BMP2K       | BMP2 inducible kinase                                           | -0.23 | -0.41 | -0.22 | -0.12 | 1 | 1 | 0 | -1 | 0 | 0 | 0 | 1 | 0 | 0 | 0 | 0 |
| 233239_at    | ZNF407      | zinc finger protein 407                                         | -0.07 | -0.15 | -0.07 | 0.15  | 1 | 1 | 0 | 0  | 0 | 1 | 0 | 1 | 0 | 0 | 0 | 0 |
| 233248_at    | C1orf43     | chromosome 1 open reading frame 43                              | -0.32 | -0.41 | -0.33 | -0.11 | 1 | 1 | 0 | 0  | 0 | 1 | 0 | 1 | 0 | 0 | 0 | 0 |
| 239151_at    | LOC399753   | hypothetical LOC399753                                          | -0.08 | -0.25 | 0.00  | 0.05  | 1 | 1 | 0 | -1 | 0 | 0 | 0 | 1 | 0 | 0 | 0 | 0 |
| 242228_at    | BICD1       | bicaudal D homolog 1 (Drosophila)                               | -0.44 | -0.53 | -0.42 | -0.23 | 1 | 1 | 0 | 0  | 0 | 1 | 0 | 1 | 0 | 0 | 0 | 0 |
| 242261_at    | IREB2       | iron-responsive element binding protein 2                       | -0.23 | -0.27 | -0.24 | 0.04  | 1 | 1 | 0 | 0  | 0 | 1 | 0 | 1 | 0 | 0 | 1 | 1 |
| 244847_at    | FAM13B      | family with sequence similarity 13, member B                    | -0.77 | -0.74 | -0.66 | -0.44 | 1 | 1 | 0 | 0  | 0 | 1 | 0 | 1 | 0 | 0 | 0 | 1 |
| 1552627_a_at | ARHGAP5     | Rho GTPase activating protein 5                                 | -0.65 | -0.54 | -0.56 | -0.23 | 1 | 1 | 0 | 0  | 0 | 1 | 0 | 1 | 0 | 0 | 1 | 1 |
| 1557409_at   | SPG7        | spastic paraplegia 7 (pure and complicated autosomal recessiv   | -0.27 | -0.29 | -0.25 | 0.02  | 1 | 1 | 0 | 0  | 0 | 1 | 0 | 1 | 0 | 0 | 1 | 1 |
| 1557581_x_at | CABIN1      | calcineurin binding protein 1                                   | -0.16 | -0.19 | -0.21 | 0.12  | 1 | 1 | 0 | 0  | 0 | 1 | 0 | 1 | 0 | 0 | 1 | 1 |
| 1558922_at   | Tia1        | TIA1 cytotoxic granule-associated RNA binding protein           | -0.23 | -0.23 | -0.19 | 0.08  | 1 | 1 | 0 | 0  | 0 | 1 | 0 | 1 | 0 | 0 | 1 | 1 |
| 1560013_at   | PDXDC1      | pyridoxal-dependent decarboxylase domain containing 1           | -0.19 | -0.25 | -0.22 | 0.06  | 1 | 1 | 0 | 0  | 0 | 1 | 0 | 1 | 0 | 0 | 1 | 0 |
| 1560676_at   | SIAH3       | seven in absentia homolog 3 (Drosophila)                        | 0.53  | 0.69  | 0.75  | 1.00  | 1 | 1 | 0 | 0  | 0 | 1 | 0 | 1 | 0 | 0 | 0 | 1 |
| 1560779_a_at | ZNF568      | Zinc finger protein 568                                         | -0.03 | -0.17 | -0.11 | 0.15  | 1 | 1 | 0 | 0  | 0 | 1 | 0 | 1 | 0 | 0 | 0 | 0 |
| 1563051_at   | OSBP        | oxysterol binding protein                                       | -0.07 | -0.09 | -0.05 | 0.22  | 1 | 1 | 0 | 0  | 0 | 1 | 0 | 1 | 0 | 0 | 1 | 1 |
| 1569706_at   | MYSM1       | Myb-like, SWIRM and MPN domains 1                               | -0.36 | -0.48 | -0.34 | -0.16 | 1 | 1 | 0 | 0  | 0 | 1 | 0 | 1 | 0 | 0 | 0 | 0 |
| 215398_at    | Cdc73       | cell division cycle 73, Paf1/RNA polymerase II complex compo    | -0.30 | -0.36 | -0.37 | -0.05 | 1 | 1 | 0 | 0  | 0 | 1 | 0 | 1 | 0 | 0 | 1 | 0 |
| 215626_at    | dock9       | dedicator of cytokinesis 9                                      | 0.09  | 0.06  | 0.15  | 0.36  | 1 | 1 | 0 | 0  | 0 | 1 | 0 | 1 | 0 | 0 | 0 | 1 |
| 215991_s_at  | KIAA0090    | KIAA0090                                                        | -0.48 | -0.59 | -0.46 | -0.27 | 1 | 1 | 0 | 0  | 0 | 1 | 0 | 1 | 0 | 0 | 0 | 0 |
| 217529_at    | ORAI2       | ORAI calcium release-activated calcium modulator 2              | -0.64 | -0.66 | -0.62 | -0.36 | 1 | 1 | 0 | 0  | 0 | 1 | 0 | 1 | 0 | 0 | 0 | 1 |
| 221231_s_at  | C14orf102   | chromosome 14 open reading frame 102                            | -0.23 | -0.31 | -0.25 | -0.01 | 1 | 1 | 0 | 0  | 0 | 1 | 0 | 1 | 0 | 0 | 0 | 0 |
| 222412_s_at  | SSR3        | signal sequence receptor, gamma (translocon-associated prote    | -0.85 | -0.97 | -0.85 | -0.66 | 1 | 1 | 0 | 0  | 0 | 1 | 0 | 1 | 0 | 0 | 0 | 0 |
| 222906_at    | FLVCR1      | feline leukemia virus subgroup C cellular receptor 1            | -0.19 | -0.27 | -0.18 | 0.04  | 1 | 1 | 0 | 0  | 0 | 1 | 0 | 1 | 0 | 0 | 0 | 0 |
| 234643_x_at  | ACSM1       | acyl-CoA synthetase medium-chain family member 1                | -0.37 | -0.35 | -0.35 | -0.05 | 1 | 1 | 0 | 0  | 0 | 1 | 0 | 1 | 0 | 0 | 1 | 1 |
| 234645_at    | MAML2       | mastermind-like 2 (Drosophila)                                  | -0.22 | -0.32 | -0.35 | -0.01 | 1 | 1 | 0 | 0  | 0 | 1 | 0 | 1 | 0 | 0 | 1 | 0 |
| 237377_at    | IGF1R       | insulin-like growth factor 1 receptor                           | -0.23 | -0.26 | -0.20 | 0.04  | 1 | 1 | 0 | 0  | 0 | 1 | 0 | 1 | 0 | 0 | 0 | 1 |
| 237877_at    | POLH        | polymerase (DNA directed), eta                                  | -0.63 | -0.70 | -0.68 | -0.39 | 1 | 1 | 0 | 0  | 0 | 1 | 0 | 1 | 0 | 0 | 1 | 0 |
| 239635_at    | RBM14       | RNA binding motif protein 14                                    | -0.31 | -0.45 | -0.34 | -0.14 | 1 | 1 | 0 | 0  | 0 | 1 | 0 | 1 | 0 | 0 | 0 | 0 |
| 239936_at    | DLEU2       | deleted in lymphocytic leukemia 2 (non-protein coding)          | -0.49 | -0.74 | -0.55 | -0.43 | 1 | 1 | 0 | -1 | 0 | 0 | 0 | 1 | 0 | 0 | 0 | 0 |
| 239963_at    | ---         | ---                                                             | 0.27  | 0.07  | 0.40  | 0.38  | 1 | 1 | 0 | -1 | 0 | 0 | 0 | 1 | 1 | 0 | 0 | 0 |
| 1557987_at   | LOC641298   | SMG1 homolog, phosphatidylinositol 3-kinase-related kinase p    | -0.61 | -0.45 | -0.55 | -0.13 | 1 | 1 | 0 | 0  | 0 | 1 | 0 | 1 | 0 | 0 | 1 | 1 |
| 1559045_at   | LOC10012828 | hypothetical LOC100128288                                       | -0.19 | -0.33 | -0.31 | -0.02 | 1 | 1 | 0 | 0  | 0 | 1 | 0 | 1 | 0 | 0 | 1 | 0 |
| 1559201_a_at | ostf1       | osteoclast stimulating factor 1                                 | -0.32 | -0.33 | -0.22 | -0.02 | 1 | 1 | 0 | 0  | 0 | 1 | 0 | 1 | 0 | 0 | 0 | 1 |
| 1559437_at   | ---         | ---                                                             | -0.12 | -0.22 | -0.10 | 0.09  | 1 | 1 | 0 | 0  | 0 | 1 | 0 | 1 | 0 | 0 | 0 | 0 |
| 1559848_at   | NSUN4       | NOP2/Sun domain family, member 4                                | -0.28 | -0.35 | -0.29 | -0.03 | 1 | 1 | 0 | 0  | 0 | 1 | 0 | 1 | 0 | 0 | 1 | 0 |
| 1565889_at   | tab2        | mitogen-activated protein kinase kinase kinase 7 interacting pr | -0.17 | -0.26 | -0.25 | 0.07  | 1 | 1 | 0 | 0  | 0 | 1 | 0 | 1 | 0 | 0 | 1 | 0 |
| 1569578_at   | LOC10012826 | ankyrin repeat domain 11; hypothetical protein LOC100128265     | -0.34 | -0.24 | -0.28 | 0.08  | 1 | 1 | 0 | 0  | 0 | 1 | 0 | 1 | 0 | 0 | 1 | 1 |
| 1569948_at   | ---         | ---                                                             | -0.35 | -0.44 | -0.38 | -0.12 | 1 | 1 | 0 | 0  | 0 | 1 | 0 | 1 | 0 | 0 | 1 | 0 |
| 1570338_at   | ---         | ---                                                             | -0.55 | -0.85 | -0.64 | -0.53 | 1 | 1 | 0 | -1 | 0 | 0 | 0 | 1 | 0 | 1 | 0 | 0 |
| 204270_at    | SKI         | v-ski sarcoma viral oncogene homolog (avian)                    | -0.87 | -0.56 | -0.55 | -0.24 | 1 | 1 | 0 | -1 | 0 | 0 | 0 | 1 | 0 | 1 | 1 | 1 |
| 215137_at    | ---         | ---                                                             | -0.05 | -0.19 | -0.07 | 0.13  | 1 | 1 | 0 | 0  | 0 | 1 | 0 | 1 | 0 | 0 | 0 | 0 |
| 232665_x_at  | SMURF1      | SMAD specific E3 ubiquitin protein ligase 1                     | -0.37 | -0.49 | -0.50 | -0.17 | 1 | 1 | 0 | 0  | 0 | 1 | 0 | 1 | 0 | 0 | 1 | 0 |
| 233055_at    | ---         | ---                                                             | -0.17 | -0.28 | -0.22 | 0.04  | 1 | 1 | 0 | 0  | 0 | 1 | 0 | 1 | 0 | 0 | 0 | 0 |
| 233957_at    | tab2        | mitogen-activated protein kinase kinase kinase 7 interacting pr | -0.88 | -0.68 | -0.59 | -0.37 | 1 | 1 | 0 | -1 | 0 | 0 | 0 | 1 | 0 | 0 | 0 | 1 |
| 234112_at    | Cblb        | Cas-Br-M (murine) ecotropic retroviral transforming sequence    | 0.08  | -0.21 | 0.01  | 0.10  | 1 | 1 | 0 | -1 | 0 | 0 | 0 | 1 | 0 | 1 | 0 | 0 |
| 238342_at    | ---         | ---                                                             | -0.24 | -0.33 | -0.27 | -0.01 | 1 | 1 | 0 | 0  | 0 | 1 | 0 | 1 | 0 | 0 | 0 | 0 |
| 239614_x_at  | GLS         | glutaminase                                                     | -0.33 | -0.21 | -0.31 | 0.11  | 1 | 1 | 0 | 0  | 0 | 1 | 0 | 1 | 0 | 0 | 1 | 1 |
| 241732_at    | cdkal1      | CDK5 regulatory subunit associated protein 1-like 1             | -0.15 | -0.25 | -0.16 | 0.07  | 1 | 1 | 0 | 0  | 0 | 1 | 0 | 1 | 0 | 0 | 0 | 0 |
| 241860_at    | STK17B      | serine/threonine kinase 17b                                     | -0.58 | -0.39 | -0.26 | -0.07 | 1 | 1 | 0 | -1 | 0 | 0 | 0 | 1 | 0 | 0 | 0 | 1 |
| 241954_at    | FDFT1       | Farnesyl-diphosphate farnesyltransferase 1                      | -0.11 | -0.08 | -0.06 | 0.24  | 1 | 1 | 0 | 0  | 0 | 1 | 0 | 1 | 0 | 0 | 1 | 1 |
| 244872_at    | RBBP4       | retinoblastoma binding protein 4                                | -0.52 | -0.53 | -0.66 | -0.21 | 1 | 1 | 0 | 0  | 0 | 1 | 0 | 1 | 0 | 0 | 1 | 1 |
| 1552633_at   | ZNF101      | zinc finger protein 101                                         | 0.16  | 0.08  | 0.21  | 0.41  | 1 | 1 | 0 | 0  | 0 | 1 | 0 | 1 | 0 | 0 | 0 | 0 |
| 1554057_at   | LOC645676   | hypothetical LOC645676                                          | -0.13 | -0.35 | -0.14 | -0.02 | 1 | 1 | 0 | -1 | 0 | 0 | 0 | 1 | 0 | 0 | 0 | 0 |
| 1557996_at   | LOC10013283 | postmeiotic segregation increased 2-like 5-like                 | -0.33 | -0.44 | -0.43 | -0.11 | 1 | 1 | 0 | 0  | 0 | 1 | 0 | 1 | 0 | 0 | 1 | 0 |
| 1558220_at   | MUC20       | Mucin 20, cell surface associated                               | -0.33 | -0.44 | -0.36 | -0.11 | 1 | 1 | 0 | 0  | 0 | 1 | 0 | 1 | 0 | 0 | 0 | 0 |
| 1558418_at   | PIAS1       | protein inhibitor of activated STAT, 1                          | -0.35 | -0.55 | -0.38 | -0.22 | 1 | 1 | 0 | -1 | 0 | 0 | 0 | 1 | 0 | 0 | 0 | 0 |
| 1558802_at   | TM2D1       | TM2 domain containing 1                                         | -0.30 | -0.41 | -0.33 | -0.09 | 1 | 1 | 0 | 0  | 0 | 1 | 0 | 1 | 0 | 0 | 0 | 0 |
| 1559449_a_at | ZNF254      | Zinc finger protein 254                                         | -0.33 | -0.34 | -0.36 | -0.01 | 1 | 1 | 0 | 0  | 0 | 1 | 0 | 1 | 0 | 0 | 1 | 1 |
| 1561973_at   | SMARCC2     | SWI/SNF related, matrix associated, actin dependent regulator   | -0.34 | -0.39 | -     |       |   |   |   |    |   |   |   |   |   |   |   |   |



|              |             |                                                                  |       |       |       |       |   |   |    |    |   |   |   |   |   |   |   |   |
|--------------|-------------|------------------------------------------------------------------|-------|-------|-------|-------|---|---|----|----|---|---|---|---|---|---|---|---|
| 238317_x_at  | RBMS1       | RNA binding motif, single stranded interacting protein 1         | -0.32 | -0.27 | -0.10 | 0.07  | 1 | 1 | 0  | 0  | 0 | 1 | 0 | 1 | 0 | 0 | 0 | 1 |
| 241716_at    | HSPD1       | heat shock 60kDa protein 1 (chaperonin)                          | -0.24 | -0.37 | -0.29 | -0.03 | 1 | 1 | 0  | 0  | 0 | 1 | 0 | 1 | 0 | 0 | 0 | 0 |
| 242433_at    | ZBTB11      | zinc finger and BTB domain containing 11                         | -0.11 | -0.32 | -0.12 | 0.02  | 1 | 1 | 0  | -1 | 0 | 0 | 0 | 1 | 0 | 0 | 0 | 0 |
| 243229_at    | ---         | ---                                                              | 0.17  | -0.16 | 0.14  | 0.18  | 1 | 1 | 0  | -1 | 0 | 0 | 0 | 1 | 1 | 1 | 0 | 0 |
| 1559490_at   | LRCH3       | leucine-rich repeats and calponin homology (CH) domain conta     | -0.22 | -0.33 | -0.25 | 0.02  | 1 | 1 | 0  | 0  | 0 | 1 | 0 | 1 | 0 | 0 | 1 | 0 |
| 1560209_at   | ---         | ---                                                              | -0.25 | -0.37 | -0.25 | -0.02 | 1 | 1 | 0  | 0  | 0 | 1 | 0 | 1 | 0 | 0 | 0 | 0 |
| 1560696_x_at | QTRTD1      | queuine tRNA-ribosyltransferase domain containing 1              | -0.42 | -0.62 | -0.44 | -0.27 | 1 | 1 | 0  | -1 | 0 | 0 | 0 | 1 | 0 | 0 | 0 | 0 |
| 1561893_at   | egln1       | egl nine homolog 1 (C. elegans)                                  | -0.33 | -0.45 | -0.42 | -0.10 | 1 | 1 | 0  | 0  | 0 | 1 | 0 | 1 | 0 | 0 | 1 | 0 |
| 1569392_at   | TECR        | trans-2,3-enoyl-CoA reductase                                    | -0.13 | -0.27 | -0.17 | 0.08  | 1 | 1 | 0  | 0  | 0 | 1 | 0 | 1 | 0 | 0 | 0 | 0 |
| 210965_x_at  | CDK13       | cyclin-dependent kinase 13                                       | -0.32 | -0.37 | -0.32 | -0.02 | 1 | 1 | 0  | 0  | 0 | 1 | 0 | 1 | 0 | 0 | 1 | 1 |
| 227891_s_at  | TAF15       | TAF15 RNA polymerase II, TATA box binding protein (TBP)-asso     | 0.01  | -0.16 | -0.06 | 0.19  | 1 | 1 | 0  | 0  | 0 | 1 | 0 | 1 | 0 | 0 | 0 | 0 |
| 234459_at    | PPHLN1      | periphilin 1                                                     | -0.07 | -0.23 | -0.10 | 0.12  | 1 | 1 | 0  | 0  | 0 | 1 | 0 | 1 | 0 | 0 | 0 | 0 |
| 236032_at    | DNM1L       | dynamitin 1-like                                                 | 0.18  | 0.00  | 0.20  | 0.35  | 1 | 1 | 0  | -1 | 0 | 0 | 0 | 1 | 0 | 0 | 0 | 0 |
| 238079_at    | TPM3        | tropomyosin 3                                                    | -0.53 | -0.63 | -0.58 | -0.28 | 1 | 1 | 0  | 0  | 0 | 1 | 0 | 1 | 0 | 0 | 1 | 0 |
| 238769_at    | MAP4K4      | mitogen-activated protein kinase kinase kinase kinase 4          | -0.23 | -0.23 | -0.08 | 0.12  | 1 | 1 | 0  | 0  | 0 | 1 | 0 | 1 | 0 | 0 | 0 | 1 |
| 238982_at    | DENR        | density-regulated protein                                        | -0.20 | -0.26 | -0.16 | 0.10  | 1 | 1 | 0  | 0  | 0 | 1 | 0 | 1 | 0 | 0 | 0 | 1 |
| 241885_at    | taf15       | TAF15 RNA polymerase II, TATA box binding protein (TBP)-asso     | -0.20 | -0.29 | -0.22 | 0.06  | 1 | 1 | 0  | 0  | 0 | 1 | 0 | 1 | 0 | 0 | 1 | 0 |
| 242527_at    | C18orf1     | chromosome 18 open reading frame 1                               | -0.26 | -0.28 | -0.17 | 0.07  | 1 | 1 | 0  | 0  | 0 | 1 | 0 | 1 | 0 | 0 | 0 | 1 |
| 1560443_at   | SMCHD1      | structural maintenance of chromosomes flexible hinge domain      | 0.06  | -0.25 | -0.08 | 0.11  | 1 | 1 | 0  | -1 | 0 | 0 | 0 | 1 | 0 | 1 | 0 | 0 |
| 1561092_at   | klhdc4      | kelch domain containing 4                                        | 0.05  | -0.17 | 0.08  | 0.19  | 1 | 1 | 0  | -1 | 0 | 0 | 0 | 1 | 0 | 0 | 0 | 0 |
| 1562270_at   | ARHGEF7     | Rho guanine nucleotide exchange factor (GEF) 7                   | -0.45 | -0.47 | -0.45 | -0.12 | 1 | 1 | 0  | 0  | 0 | 1 | 0 | 1 | 0 | 0 | 1 | 1 |
| 1563724_at   | SACS        | spastic ataxia of Charlevoix-Saguenay (sacsin)                   | -0.05 | -0.23 | 0.01  | 0.13  | 1 | 1 | 0  | -1 | 0 | 0 | 0 | 1 | 0 | 0 | 0 | 0 |
| 1564972_x_at | SETDB2      | SET domain, bifurcated 2                                         | 0.05  | -0.12 | 0.11  | 0.24  | 1 | 1 | 0  | -1 | 0 | 0 | 0 | 1 | 0 | 0 | 0 | 0 |
| 1568858_at   | ubfd1       | ubiquitin family domain containing 1                             | -0.28 | -0.35 | -0.29 | 0.01  | 1 | 1 | 0  | 0  | 0 | 1 | 0 | 1 | 0 | 0 | 1 | 1 |
| 215330_at    | FLJ43663    | hypothetical LOC378805                                           | -0.62 | -0.57 | -0.55 | -0.21 | 1 | 1 | 0  | 0  | 0 | 1 | 0 | 1 | 0 | 0 | 1 | 1 |
| 215986_at    | ---         | ---                                                              | -0.62 | -0.74 | -0.69 | -0.38 | 1 | 1 | 0  | 0  | 0 | 1 | 0 | 1 | 0 | 0 | 0 | 0 |
| 233724_at    | ARNT        | aryl hydrocarbon receptor nuclear translocator                   | -0.47 | -0.61 | -0.52 | -0.25 | 1 | 1 | 0  | 0  | 0 | 1 | 0 | 1 | 0 | 0 | 1 | 0 |
| 239008_at    | NCRNA00182  | Non-protein coding RNA 182                                       | -1.18 | -0.92 | -0.83 | -0.56 | 1 | 1 | -1 | 0  | 0 | 1 | 0 | 1 | 0 | 0 | 0 | 1 |
| 243067_at    | ---         | ---                                                              | -0.04 | -0.28 | -0.01 | 0.08  | 1 | 1 | 0  | -1 | 0 | 0 | 0 | 1 | 0 | 0 | 0 | 0 |
| 243673_at    | RBM41       | RNA binding motif protein 41                                     | -0.25 | -0.39 | -0.37 | -0.03 | 1 | 1 | 0  | 0  | 0 | 1 | 0 | 1 | 0 | 0 | 1 | 0 |
| 1556318_s_at | CAND1       | cullin-associated and neddylation-dissociated 1                  | -0.10 | -0.24 | -0.19 | 0.13  | 1 | 1 | 0  | 0  | 0 | 1 | 0 | 1 | 0 | 0 | 1 | 0 |
| 1557551_at   | Cyth1       | cytohesin 1                                                      | -0.52 | -0.56 | -0.59 | -0.19 | 1 | 1 | 0  | 0  | 0 | 1 | 0 | 1 | 0 | 0 | 1 | 1 |
| 1560814_a_at | C15orf57    | chromosome 15 open reading frame 57                              | -0.50 | -0.45 | -0.47 | -0.08 | 1 | 1 | 0  | 0  | 0 | 1 | 0 | 1 | 0 | 0 | 1 | 1 |
| 1566980_at   | MAPK1P1L    | mitogen-activated protein kinase 1 interacting protein 1-like    | -0.29 | -0.52 | -0.31 | -0.15 | 1 | 1 | 0  | -1 | 0 | 0 | 0 | 1 | 0 | 0 | 0 | 0 |
| 1569527_at   | STAU1       | stauferin, RNA binding protein, homolog 1 (Drosophila)           | -0.37 | -0.51 | -0.49 | -0.14 | 1 | 1 | 0  | 0  | 0 | 1 | 0 | 1 | 0 | 0 | 1 | 0 |
| 215555_at    | C1orf63     | chromosome 1 open reading frame 63                               | -0.18 | -0.31 | -0.18 | 0.06  | 1 | 1 | 0  | 0  | 0 | 1 | 0 | 1 | 0 | 0 | 0 | 0 |
| 232759_at    | Invs        | inversin                                                         | -0.03 | -0.20 | -0.19 | 0.17  | 1 | 1 | 0  | 0  | 0 | 1 | 0 | 1 | 0 | 0 | 1 | 0 |
| 235442_at    | CXorf56     | chromosome X open reading frame 56                               | -0.74 | -0.79 | -0.60 | -0.42 | 1 | 1 | 0  | 0  | 0 | 1 | 0 | 1 | 0 | 0 | 0 | 1 |
| 237586_at    | EPS15       | epidermal growth factor receptor pathway substrate 15            | -0.50 | -0.43 | -0.36 | -0.06 | 1 | 1 | 0  | 0  | 0 | 1 | 0 | 1 | 0 | 0 | 1 | 1 |
| 239651_at    | ANAPC5      | anaphase promoting complex subunit 5                             | -0.14 | -0.03 | -0.02 | 0.33  | 1 | 1 | 0  | 0  | 0 | 1 | 0 | 1 | 0 | 0 | 1 | 1 |
| 241723_at    | IQGAP2      | IQ motif containing GTPase activating protein 2                  | -0.16 | -0.31 | -0.20 | 0.05  | 1 | 1 | 0  | 0  | 0 | 1 | 0 | 1 | 0 | 0 | 0 | 0 |
| 242879_x_at  | Akt3        | v-akt murine thymoma viral oncogene homolog 3 (protein kinase    | -0.70 | -0.65 | -0.66 | -0.28 | 1 | 1 | 0  | 0  | 0 | 1 | 0 | 1 | 0 | 0 | 1 | 1 |
| 1556849_at   | Rnf38       | ring finger protein 38                                           | -0.14 | -0.20 | -0.19 | 0.18  | 1 | 1 | 0  | 0  | 0 | 1 | 0 | 1 | 0 | 0 | 1 | 1 |
| 1557289_s_at | GTF2IRD2    | GTF2I repeat domain containing 2                                 | -0.09 | -0.16 | -0.06 | 0.22  | 1 | 1 | 0  | 0  | 0 | 1 | 0 | 1 | 0 | 0 | 1 | 1 |
| 1558719_s_at | RPAIN       | RPA interacting protein                                          | 0.05  | -0.26 | -0.03 | 0.12  | 1 | 1 | 0  | -1 | 0 | 0 | 0 | 1 | 0 | 1 | 0 | 0 |
| 1559039_at   | DHX36       | DEAH (Asp-Glu-Ala-His) box polypeptide 36                        | -0.08 | -0.17 | -0.12 | 0.21  | 1 | 1 | 0  | 0  | 0 | 1 | 0 | 1 | 0 | 0 | 1 | 1 |
| 1560349_at   | COMMD10     | COMM domain containing 10                                        | -0.25 | -0.48 | -0.29 | -0.09 | 1 | 1 | 0  | -1 | 0 | 0 | 0 | 1 | 0 | 0 | 0 | 0 |
| 208154_at    | ---         | ---                                                              | -0.24 | -0.32 | -0.25 | 0.06  | 1 | 1 | 0  | 0  | 0 | 1 | 0 | 1 | 0 | 0 | 1 | 1 |
| 213650_at    | LOC10050974 | Golgin subfamily A member 8B-like                                | -0.03 | -0.16 | 0.03  | 0.22  | 1 | 1 | 0  | 0  | 0 | 1 | 0 | 1 | 0 | 0 | 0 | 0 |
| 215866_at    | EEF1G       | eukaryotic translation elongation factor 1 gamma                 | -0.36 | -0.60 | -0.42 | -0.21 | 1 | 1 | 0  | -1 | 0 | 0 | 0 | 1 | 0 | 0 | 0 | 0 |
| 216983_s_at  | ZNF224      | zinc finger protein 224                                          | -0.23 | -0.45 | -0.27 | -0.07 | 1 | 1 | 0  | -1 | 0 | 0 | 0 | 1 | 0 | 0 | 0 | 0 |
| 220216_at    | C8orf44     | chromosome 8 open reading frame 44                               | -0.43 | -0.58 | -0.53 | -0.21 | 1 | 1 | 0  | 0  | 0 | 1 | 0 | 1 | 0 | 0 | 1 | 0 |
| 231979_at    | ---         | ---                                                              | -0.32 | -0.43 | -0.40 | -0.05 | 1 | 1 | 0  | 0  | 0 | 1 | 0 | 1 | 0 | 0 | 1 | 1 |
| 239937_at    | ZNF207      | Zinc finger protein 207                                          | -0.02 | -0.20 | -0.12 | 0.18  | 1 | 1 | 0  | 0  | 0 | 1 | 0 | 1 | 0 | 0 | 1 | 0 |
| 241788_x_at  | actn4       | actinin, alpha 4                                                 | -0.76 | -0.92 | -0.76 | -0.54 | 1 | 1 | 0  | 0  | 0 | 1 | 0 | 1 | 0 | 0 | 0 | 0 |
| 1555379_at   | FAM159A     | family with sequence similarity 159, member A                    | -0.26 | -0.34 | -0.14 | 0.05  | 1 | 1 | 0  | 0  | 0 | 1 | 0 | 1 | 0 | 0 | 0 | 1 |
| 1556462_a_at | Klf12       | Kruppel-like factor 12                                           | 0.06  | -0.26 | 0.18  | 0.13  | 1 | 1 | 0  | -1 | 0 | 0 | 0 | 1 | 1 | 1 | 0 | 0 |
| 1557145_at   | STK38       | Serine/threonine kinase 38                                       | -0.13 | -0.23 | -0.14 | 0.16  | 1 | 1 | 0  | 0  | 0 | 1 | 0 | 1 | 0 | 0 | 1 | 1 |
| 1562161_at   | ---         | ---                                                              | -0.17 | -0.30 | -0.19 | 0.09  | 1 | 1 | 0  | 0  | 0 | 1 | 0 | 1 | 0 | 0 | 1 | 0 |
| 1564639_at   | LOC389906   | Similar to Serine/threonine-protein kinase PRKX (Protein kinase  | -0.18 | -0.28 | -0.18 | 0.11  | 1 | 1 | 0  | 0  | 0 | 1 | 0 | 1 | 0 | 0 | 1 | 1 |
| 1564640_at   | MGA         | MAX gene associated                                              | -0.28 | -0.46 | -0.36 | -0.08 | 1 | 1 | 0  | 0  | 0 | 1 | 0 | 1 | 0 | 0 | 1 | 0 |
| 1565810_at   | Ppp3r1      | protein phosphatase 3 (formerly 2B), regulatory subunit B, alpha | -0.58 | -0.63 | -0.51 | -0.24 | 1 | 1 | 0  | 0  | 0 | 1 | 0 | 1 | 0 | 0 | 1 | 1 |
| 207474_at    | SNRK        | SNF related kinase                                               | -0.09 | -0.24 | -0.16 | 0.14  | 1 | 1 | 0  | 0  | 0 | 1 | 0 | 1 | 0 | 0 | 1 | 0 |
| 210867_at    | CNOT4       | CCR4-NOT transcription complex, subunit 4                        | -0.36 | -0.52 | -0.44 | -0.12 | 1 | 1 | 0  | 0  | 0 | 1 | 0 | 1 | 0 | 0 | 1 | 0 |
| 215123_at    | NPIPL3      | nuclear pore complex interacting protein-like 3                  | -0.46 | -0.59 | -0.49 | -0.19 | 1 | 1 | 0  | 0  | 0 | 1 | 0 | 1 | 0 | 0 | 0 | 0 |
| 216850_at    | SNRPN       | small nuclear ribonucleoprotein polypeptide N                    | -0.07 | -0.30 | -0.02 | 0.09  | 1 | 1 | 0  | -1 | 0 | 0 | 0 | 1 | 0 | 0 | 0 | 0 |
| 220586_at    | CHD9        | chromodomain helicase DNA binding protein 9                      | -0.26 | -0.38 | -0.36 | 0.01  | 1 | 1 | 0  | 0  | 0 | 1 | 0 | 1 | 0 | 0 | 1 | 1 |
| 231829_at    | MAVS        | mitochondrial antiviral signaling protein                        | -0.33 | -0.50 | -0.36 | -0.11 | 1 | 1 | 0  | 0  | 0 | 1 | 0 | 1 | 0 | 0 | 0 | 0 |
| 236887_at    | KIN         | KIN, antigenic determinant of recA protein homolog (mouse)       | -0.54 | -0.67 | -0.63 | -0.27 | 1 | 1 | 0  | 0  | 0 | 1 | 0 | 1 | 0 | 0 | 1 | 1 |
| 242549_at    | PRKD3       | protein kinase D3                                                | -0.38 | -0.42 | -0.30 | -0.03 | 1 | 1 | 0  | 0  | 0 | 1 | 0 | 1 | 0 | 0 | 1 | 1 |
| 243360_at    | Tmed4       | transmembrane emp24 protein transport domain containing 4        | -0.48 | -0.58 | -0.48 | -0.19 | 1 | 1 | 0  | 0  | 0 | 1 | 0 | 1 | 0 | 0 | 1 | 1 |
| 155498_at    | ---         | ---                                                              | -0.83 | -0.95 | -0.95 | -0.55 | 1 | 1 | 0  | 0  | 0 | 1 | 0 | 1 | 0 | 0 | 1 | 0 |
| 1558515_at   | NCRNA00182  | non-protein coding RNA 182                                       | -0.79 | -0.78 | -0.86 | -0.38 | 1 | 1 | 0  | 0  | 0 | 1 | 0 | 1 | 0 | 0 | 1 | 1 |
| 1562238_at   | USPL1       | ubiquitin specific peptidase like 1                              | -0.04 | -0.28 | -0.04 | 0.12  | 1 | 1 | 0  | -1 | 0 | 0 | 0 | 1 | 0 | 0 | 0 | 0 |
| 1564753_at   | LASS6       | LAG1 homolog, ceramide synthase 6                                | 0.34  | 0.14  | 0.32  | 0.54  | 1 | 1 | 0  | -1 | 0 | 0 | 0 | 1 | 0 | 0 | 0 | 0 |
| 1566040_at   | LOC10028865 | Similar to hCG2003116                                            | 0.00  | -0.14 | -0.04 | 0.27  | 1 | 1 | 0  | 0  | 0 | 1 | 0 | 1 | 0 | 0 | 1 | 1 |
| 215308_at    | XRCC6       | X-ray repair complementing defective repair in Chinese hamster   | -0.48 | -0.73 | -0.45 | -0.33 | 1 | 1 | 0  | -1 | 0 | 0 | 0 | 1 | 0 | 0 | 0 | 0 |
| 216813_at    | ---         | ---                                                              | -0.80 | -0.90 | -0.85 | -0.50 | 1 | 1 | 0  | 0  | 0 | 1 | 0 | 1 | 0 | 0 | 0 | 0 |
| 219341_at    | CLN8        | ceroid-lipofuscinosis, neuronal 8 (epilepsy, progressive with me | -1.32 | -1.55 | -1.36 | -1.16 | 1 | 1 | 0  | -1 | 0 | 0 | 0 | 1 | 0 | 0 | 0 | 0 |
| 223036_at    | FARS8       | phenylalanyl-tRNA synthetase, beta subunit                       | -0.13 | -0.30 | -0.23 | 0.10  | 1 | 1 | 0  | 0  | 0 | 1 | 0 | 1 | 0 | 0 | 1 | 0 |
| 232330_at    | C7orf44     | chromosome 7 open reading frame 44                               | -0.07 | -0.07 | -0.05 | 0.33  | 1 | 1 | 0  | 0  | 0 | 1 | 0 | 1 | 0 | 0 | 1 | 1 |
| 232879_at    | CRTC3       | CREB regulated transcription coactivator 3                       | -0.16 | -0.32 | -0.24 | 0.08  | 1 | 1 | 0  | 0  | 0 | 1 | 0 | 1 | 0 | 0 | 1 | 0 |
| 235028_at    | ---         | ---                                                              | -0.43 | -0.65 | -0.67 | -0.25 | 1 | 1 | 0  | 0  | 0 | 1 | 0 | 1 | 0 | 0 | 1 | 0 |
| 238393_at    | bmpr2       | bone morphogenetic protein receptor, type II (serine/threonine   | -1.12 | -1.26 | -1.16 | -0.85 | 1 | 1 | 0  | 0  |   |   |   |   |   |   |   |   |



|              |                |                                                                    |       |       |       |       |   |   |   |    |   |   |   |   |   |   |   |   |
|--------------|----------------|--------------------------------------------------------------------|-------|-------|-------|-------|---|---|---|----|---|---|---|---|---|---|---|---|
| 1564424_at   | Esyt2          | family with sequence similarity 62 (C2 domain containing), me      | 0.04  | -0.23 | -0.02 | 0.20  | 1 | 1 | 0 | -1 | 0 | 0 | 0 | 1 | 0 | 0 | 0 | 0 |
| 205594_at    | ZNF652         | zinc finger protein 652                                            | -0.59 | -0.72 | -0.64 | -0.29 | 1 | 1 | 0 | 0  | 0 | 1 | 0 | 1 | 0 | 0 | 0 | 0 |
| 215390_at    | c9orf5         | chromosome 9 open reading frame 5                                  | -0.25 | -0.44 | -0.36 | -0.01 | 1 | 1 | 0 | 0  | 0 | 1 | 0 | 1 | 0 | 0 | 1 | 0 |
| 217534_at    | FAM49B         | family with sequence similarity 49, member B                       | -0.49 | -0.66 | -0.55 | -0.23 | 1 | 1 | 0 | 0  | 0 | 1 | 0 | 1 | 0 | 0 | 1 | 1 |
| 232466_at    | CUL4A          | Cullin 4A                                                          | -0.11 | -0.28 | -0.22 | 0.15  | 1 | 1 | 0 | 0  | 0 | 1 | 0 | 1 | 0 | 0 | 1 | 1 |
| 235030_at    | FAM55C         | family with sequence similarity 55, member C                       | -0.70 | -0.71 | -0.58 | -0.28 | 1 | 1 | 0 | 0  | 0 | 1 | 0 | 1 | 0 | 0 | 1 | 1 |
| 235058_at    | GPN2           | GPN-loop GTPase 2                                                  | -0.36 | -0.54 | -0.37 | -0.11 | 1 | 1 | 0 | -1 | 0 | 1 | 0 | 1 | 0 | 0 | 0 | 0 |
| 236944_at    | ---            | ---                                                                | -0.11 | -0.38 | -0.18 | 0.05  | 1 | 1 | 0 | -1 | 0 | 0 | 0 | 1 | 0 | 0 | 0 | 0 |
| 242576_x_at  | N4BP2L2        | NEDD4 binding protein 2-like 2                                     | -0.28 | -0.49 | -0.34 | -0.05 | 1 | 1 | 0 | 0  | 0 | 1 | 0 | 1 | 0 | 0 | 1 | 0 |
| 242797_x_at  | zfr            | zinc finger RNA binding protein                                    | -0.39 | -0.57 | -0.58 | -0.14 | 1 | 1 | 0 | 0  | 0 | 1 | 0 | 1 | 0 | 0 | 1 | 0 |
| 1557580_at   | CABIN1         | calcineurin binding protein 1                                      | -0.29 | -0.30 | -0.34 | 0.13  | 1 | 1 | 0 | 0  | 0 | 1 | 0 | 1 | 0 | 0 | 1 | 1 |
| 1562250_at   | SEMA4D         | sema domain, immunoglobulin domain (Ig), transmembrane d           | -0.21 | -0.29 | -0.26 | 0.15  | 1 | 1 | 0 | 0  | 0 | 1 | 0 | 1 | 0 | 0 | 1 | 1 |
| 1562467_at   | ppp3ca         | protein phosphatase 3 (formerly 2B), catalytic subunit, alpha is   | -0.74 | -0.95 | -0.79 | -0.51 | 1 | 1 | 0 | 0  | 0 | 1 | 0 | 1 | 0 | 0 | 0 | 0 |
| 216765_at    | MAP2K5         | Mitogen-activated protein kinase kinase 5                          | -0.35 | -0.53 | -0.34 | -0.09 | 1 | 1 | 0 | -1 | 0 | 1 | 0 | 1 | 0 | 0 | 0 | 0 |
| 232295_at    | GFM1           | G elongation factor, mitochondrial 1                               | -0.24 | -0.38 | -0.36 | 0.06  | 1 | 1 | 0 | 0  | 0 | 1 | 0 | 1 | 0 | 0 | 1 | 1 |
| 233554_at    | UBAC2          | UBA domain containing 2                                            | -0.04 | -0.29 | -0.21 | 0.15  | 1 | 1 | 0 | 0  | 0 | 1 | 0 | 1 | 0 | 0 | 1 | 0 |
| 242423_x_at  | ---            | ---                                                                | -0.30 | -0.47 | -0.30 | -0.03 | 1 | 1 | 0 | -1 | 0 | 1 | 0 | 1 | 0 | 0 | 0 | 1 |
| 1563173_at   | ---            | ---                                                                | -0.16 | -0.35 | -0.04 | 0.11  | 1 | 1 | 0 | -1 | 0 | 0 | 0 | 1 | 0 | 0 | 0 | 1 |
| 1564820_at   | LOC10013081    | RAB6C, member RAS oncogene family; RAB6A, member RAS on            | -0.75 | -0.83 | -0.80 | -0.37 | 1 | 1 | 0 | 0  | 0 | 1 | 0 | 1 | 0 | 0 | 1 | 1 |
| 1569538_at   | ---            | ---                                                                | -0.70 | -0.76 | -0.72 | -0.31 | 1 | 1 | 0 | 0  | 0 | 1 | 0 | 1 | 0 | 0 | 1 | 1 |
| 207735_at    | RNF125         | ring finger protein 125                                            | -0.03 | -0.46 | -0.21 | -0.01 | 1 | 1 | 0 | -1 | 0 | 0 | 0 | 1 | 0 | 1 | 0 | 0 |
| 212172_at    | AK2            | adenylate kinase 2                                                 | -0.17 | -0.34 | -0.25 | 0.12  | 1 | 1 | 0 | 0  | 0 | 1 | 0 | 1 | 0 | 0 | 1 | 1 |
| 216373_at    | TAPT1          | transmembrane anterior posterior transformation 1                  | -0.48 | -0.49 | -0.38 | -0.04 | 1 | 1 | 0 | 0  | 0 | 1 | 0 | 1 | 0 | 0 | 0 | 1 |
| 222319_at    | nap114         | nucleosome assembly protein 1-like 4                               | -0.15 | -0.40 | -0.28 | 0.05  | 1 | 1 | 0 | 0  | 0 | 1 | 0 | 1 | 0 | 0 | 0 | 0 |
| 224098_at    | ABAT           | 4-aminobutyrate aminotransferase                                   | -0.84 | -0.91 | -0.83 | -0.46 | 1 | 1 | 0 | 0  | 0 | 1 | 0 | 1 | 0 | 0 | 1 | 1 |
| 234149_at    | THRAP3         | thyroid hormone receptor associated protein 3                      | -0.62 | -0.75 | -0.67 | -0.30 | 1 | 1 | 0 | 0  | 0 | 1 | 0 | 1 | 0 | 0 | 0 | 1 |
| 243023_at    | ---            | ---                                                                | -0.09 | -0.23 | -0.02 | 0.22  | 1 | 1 | 0 | 0  | 0 | 1 | 0 | 1 | 0 | 0 | 0 | 1 |
| 244010_at    | MLL3           | myeloid/lymphoid or mixed-lineage leukemia 3                       | -0.41 | -0.60 | -0.53 | -0.15 | 1 | 1 | 0 | 0  | 0 | 1 | 0 | 1 | 0 | 0 | 1 | 0 |
| 1555199_at   | GOSR1          | golgi SNAP receptor complex member 1                               | -0.63 | -0.78 | -0.74 | -0.31 | 1 | 1 | 0 | 0  | 0 | 1 | 0 | 1 | 0 | 0 | 1 | 1 |
| 1562307_at   | RNF24          | ring finger protein 24                                             | -0.97 | -1.20 | -1.13 | -0.73 | 1 | 1 | 0 | 0  | 0 | 1 | 0 | 1 | 0 | 0 | 1 | 0 |
| 1570571_at   | CCDC91         | Coiled-coil domain containing 91                                   | -0.25 | -0.42 | -0.30 | 0.04  | 1 | 1 | 0 | 0  | 0 | 1 | 0 | 1 | 0 | 0 | 0 | 1 |
| 214918_at    | HNRNPM         | heterogeneous nuclear ribonucleoprotein M                          | -0.54 | -0.56 | -0.50 | -0.11 | 1 | 1 | 0 | 0  | 0 | 1 | 0 | 1 | 0 | 0 | 1 | 1 |
| 215474_at    | NSMCE2         | non-SMC element 2, MMS21 homolog (S. cerevisiae)                   | -0.74 | -0.92 | -0.69 | -0.45 | 1 | 1 | 0 | -1 | 0 | 1 | 0 | 1 | 0 | 0 | 0 | 1 |
| 224031_at    | STK17A         | serine/threonine kinase 17a                                        | -0.27 | -0.38 | -0.13 | 0.08  | 1 | 1 | 0 | 0  | 0 | 1 | 0 | 1 | 0 | 0 | 0 | 1 |
| 1552867_at   | zmym2          | zinc finger, MYM-type 2                                            | -0.73 | -0.88 | -0.92 | -0.40 | 1 | 1 | 0 | 0  | 0 | 1 | 0 | 1 | 0 | 0 | 1 | 0 |
| 1559139_at   | NOC2L          | nucleolar complex associated 2 homolog (S. cerevisiae)             | -0.11 | -0.34 | -0.19 | 0.13  | 1 | 1 | 0 | 0  | 0 | 1 | 0 | 1 | 0 | 0 | 1 | 0 |
| 1559987_at   | MSI2           | musashi homolog 2 (Drosophila)                                     | -0.30 | -0.46 | -0.28 | 0.01  | 1 | 1 | 0 | 0  | 0 | 1 | 0 | 1 | 0 | 0 | 1 | 1 |
| 1570415_at   | DDX52          | DEAD (Asp-Glu-Ala-Asp) box polypeptide 52                          | -0.31 | -0.54 | -0.31 | -0.07 | 1 | 1 | 0 | -1 | 0 | 1 | 0 | 1 | 0 | 0 | 0 | 0 |
| 205238_at    | TRMT2B         | TRM2 tRNA methyltransferase 2 homolog B (S. cerevisiae)            | -0.45 | -0.70 | -0.53 | -0.23 | 1 | 1 | 0 | 0  | 0 | 1 | 0 | 1 | 0 | 0 | 1 | 0 |
| 208077_at    | C9orf38        | chromosome 9 open reading frame 38                                 | 0.51  | 0.17  | 0.65  | 0.64  | 1 | 1 | 0 | -1 | 0 | 0 | 0 | 1 | 1 | 1 | 0 | 0 |
| 239453_at    | Fnbp1          | formin binding protein 1                                           | -0.15 | -0.36 | -0.13 | 0.11  | 1 | 1 | 0 | -1 | 0 | 1 | 0 | 1 | 0 | 0 | 0 | 0 |
| 1564970_at   | SETDB2         | SET domain, bifurcated 2                                           | -0.08 | -0.25 | -0.04 | 0.23  | 1 | 1 | 0 | -1 | 0 | 1 | 0 | 1 | 0 | 0 | 0 | 1 |
| 1569311_at   | ---            | ---                                                                | -0.21 | -0.46 | -0.35 | 0.02  | 1 | 1 | 0 | 0  | 0 | 1 | 0 | 1 | 0 | 0 | 1 | 0 |
| 212182_at    | NUDT4 /// NU   | nudix (nucleoside diphosphate linked moiety X)-type motif 4 //     | -0.18 | -0.36 | -0.12 | 0.12  | 1 | 1 | 0 | -1 | 0 | 1 | 0 | 1 | 0 | 0 | 0 | 1 |
| 215900_at    | PPPDE1         | PPPDE peptidase domain containing 1                                | -0.42 | -0.64 | -0.45 | -0.16 | 1 | 1 | 0 | -1 | 0 | 1 | 0 | 1 | 0 | 0 | 1 | 0 |
| 232535_at    | ---            | ---                                                                | -0.66 | -0.86 | -0.63 | -0.37 | 1 | 1 | 0 | -1 | 0 | 1 | 0 | 1 | 0 | 0 | 0 | 0 |
| 1557512_at   | CLIP1          | CAP-GLY domain containing linker protein 1                         | -0.61 | -0.92 | -0.69 | -0.42 | 1 | 1 | 0 | -1 | 0 | 1 | 0 | 1 | 0 | 0 | 0 | 0 |
| 1557562_at   | GRIPAP1        | GRIP1 associated protein 1                                         | -0.54 | -0.70 | -0.55 | -0.20 | 1 | 1 | 0 | 0  | 0 | 1 | 0 | 1 | 0 | 0 | 1 | 1 |
| 205727_at    | TEP1           | telomerase-associated protein 1                                    | -0.68 | -0.98 | -0.72 | -0.48 | 1 | 1 | 0 | -1 | 0 | 1 | 0 | 1 | 0 | 0 | 0 | 0 |
| 215889_at    | SKIL           | SKI-like oncogene                                                  | -1.26 | -1.20 | -0.90 | -0.71 | 1 | 1 | 0 | 0  | 0 | 1 | 0 | 1 | 0 | 0 | 0 | 1 |
| 235220_at    | YIPF4          | Yip1 domain family, member 4                                       | -0.69 | -0.79 | -0.69 | -0.28 | 1 | 1 | 0 | 0  | 0 | 1 | 0 | 1 | 0 | 0 | 1 | 1 |
| 215029_at    | AKIRIN1        | akirin 1                                                           | -0.60 | -0.90 | -0.77 | -0.39 | 1 | 1 | 0 | 0  | 0 | 1 | 0 | 1 | 0 | 0 | 1 | 0 |
| 1556657_at   | Mbn1           | muscleblind-like (Drosophila)                                      | -0.12 | -0.49 | -0.31 | 0.03  | 1 | 1 | 0 | -1 | 0 | 0 | 0 | 1 | 0 | 0 | 0 | 0 |
| 1562412_at   | GPR89A /// G   | G protein-coupled receptor 89C; G protein-coupled receptor 8       | -0.29 | -0.34 | -0.18 | 0.18  | 1 | 1 | 0 | 0  | 0 | 1 | 0 | 1 | 0 | 0 | 1 | 1 |
| 236237_at    | kiaa1370       | KIAA1370                                                           | 0.15  | -0.09 | 0.14  | 0.42  | 1 | 1 | 0 | -1 | 0 | 1 | 0 | 1 | 0 | 0 | 1 | 1 |
| 236985_at    | EIF4BP7 /// EI | similar to eukaryotic translation initiation factor 4H; eukaryotic | -0.42 | -0.58 | -0.30 | -0.06 | 1 | 1 | 0 | 0  | 0 | 1 | 0 | 1 | 0 | 0 | 0 | 1 |
| 238785_at    | ---            | ---                                                                | -0.67 | -0.83 | -0.53 | -0.31 | 1 | 1 | 0 | 0  | 0 | 1 | 0 | 1 | 0 | 0 | 0 | 1 |
| 1566191_at   | SUZ12          | Suppressor of zeste 12 homolog (Drosophila)                        | -0.45 | -0.64 | -0.53 | -0.11 | 1 | 1 | 0 | 0  | 0 | 1 | 0 | 1 | 0 | 0 | 1 | 1 |
| 1570249_x_at | GNB1           | guanine nucleotide binding protein (G protein), beta polypepti     | -0.75 | -0.92 | -0.72 | -0.38 | 1 | 1 | 0 | 0  | 0 | 1 | 0 | 1 | 0 | 0 | 0 | 1 |
| 210556_at    | NFATC3         | nuclear factor of activated T-cells, cytoplasmic, calcineurin-dep  | -0.23 | -0.43 | -0.28 | 0.09  | 1 | 1 | 0 | 0  | 0 | 1 | 0 | 1 | 0 | 0 | 1 | 1 |
| 233866_at    | KLHL5          | kelch-like 5 (Drosophila)                                          | -0.46 | -0.57 | -0.39 | -0.04 | 1 | 1 | 0 | 0  | 0 | 1 | 0 | 1 | 0 | 0 | 1 | 1 |
| 235061_at    | PPM1K          | protein phosphatase, Mg2+/Mn2+ dependent, 1K                       | -0.11 | -0.33 | -0.18 | 0.19  | 1 | 1 | 0 | 0  | 0 | 1 | 0 | 1 | 0 | 0 | 1 | 1 |
| 238931_at    | METT10D        | methyltransferase 10 domain containing                             | -0.44 | -0.73 | -0.39 | -0.19 | 1 | 1 | 0 | -1 | 0 | 1 | 0 | 1 | 0 | 0 | 0 | 0 |
| 1569540_at   | nlk            | nemo-like kinase                                                   | -0.50 | -0.79 | -0.66 | -0.26 | 1 | 1 | 0 | 0  | 0 | 1 | 0 | 1 | 0 | 0 | 1 | 0 |
| 1554306_at   | ITPKB          | inositol 1,4,5-trisphosphate 3-kinase B                            | -0.55 | -0.66 | -0.52 | -0.11 | 1 | 1 | 0 | 0  | 0 | 1 | 0 | 1 | 0 | 0 | 1 | 1 |
| 1560048_at   | ---            | ---                                                                | -0.46 | -0.74 | -0.56 | -0.19 | 1 | 1 | 0 | -1 | 0 | 1 | 0 | 1 | 0 | 0 | 1 | 1 |
| 215175_at    | PCNX           | pecanex homolog (Drosophila)                                       | -0.61 | -0.84 | -0.60 | -0.27 | 1 | 1 | 0 | -1 | 0 | 1 | 0 | 1 | 0 | 0 | 0 | 1 |
| 232861_at    | PDP2           | pyruvate dehydrogenase phosphatase catalytic subunit 2             | -0.79 | -0.71 | -0.79 | -0.15 | 1 | 1 | 0 | 0  | 0 | 1 | 0 | 1 | 0 | 0 | 1 | 1 |
| 235551_at    | WDR4           | WD repeat domain 4                                                 | -0.59 | -0.73 | -0.64 | -0.17 | 1 | 1 | 0 | 0  | 0 | 1 | 0 | 1 | 0 | 0 | 1 | 1 |
| 1555317_at   | POLK           | polymerase (DNA directed) kappa                                    | -0.43 | -0.74 | -0.46 | -0.17 | 1 | 1 | 0 | -1 | 0 | 1 | 0 | 1 | 0 | 0 | 0 | 0 |
| 234148_at    | LRRC8D         | leucine rich repeat containing 8 family, member D                  | -0.33 | -0.46 | -0.38 | 0.11  | 1 | 1 | 0 | 0  | 0 | 1 | 0 | 1 | 0 | 0 | 1 | 1 |
| 243134_at    | ---            | ---                                                                | -0.47 | -0.65 | -0.51 | -0.09 | 1 | 1 | 0 | 0  | 0 | 1 | 0 | 1 | 0 | 0 | 1 | 1 |
| 220900_at    | ---            | ---                                                                | -0.42 | -0.77 | -0.38 | -0.18 | 1 | 1 | 0 | -1 | 0 | 1 | 0 | 1 | 0 | 0 | 0 | 0 |
| 242974_at    | CD47           | CD47 molecule                                                      | 0.04  | -0.36 | -0.06 | 0.23  | 1 | 1 | 0 | -1 | 0 | 1 | 0 | 1 | 0 | 1 | 0 | 0 |
| 207286_at    | CEP135         | centrosomal protein 135kDa                                         | -0.10 | -0.41 | -0.20 | 0.19  | 1 | 1 | 0 | -1 | 0 | 1 | 0 | 1 | 0 | 0 | 1 | 1 |
| 1570248_at   | GNB1           | guanine nucleotide binding protein (G protein), beta polypepti     | -0.83 | -1.02 | -0.87 | -0.42 | 1 | 1 | 0 | 0  | 0 | 1 | 0 | 1 | 0 | 0 | 1 | 1 |
| 1569312_at   | ZNF146         | zinc finger protein 146                                            | -0.37 | -0.70 | -0.43 | -0.08 | 1 | 1 | 0 | -1 | 0 | 1 | 0 | 1 | 0 | 0 | 0 | 0 |
| 242691_at    | ---            | ---                                                                | -1.19 | -1.33 | -1.24 | -0.71 | 1 | 1 | 0 | 0  | 0 | 1 | 0 | 1 | 0 | 0 | 1 | 1 |
| 217594_at    | ZCCHC11        | zinc finger, CCHC domain containing 11                             | -0.75 | -0.84 | -0.81 | -0.21 | 1 | 1 | 0 | 0  | 0 | 1 | 0 | 1 | 0 | 0 | 1 | 1 |
| 241879_at    | LPP            | LIM domain containing preferred translocation partner in lipor     | -0.82 | -1.20 | -0.84 | -0.57 | 1 | 1 | 0 | -1 | 0 | 1 | 0 | 1 | 0 | 0 | 0 | 0 |
| 1565743_at   | N4BP2L2        | NEDD4 binding protein 2-like 2                                     | -0.52 | -0.90 | -0.74 | -0.26 | 1 | 1 | 0 | 0  | 0 | 1 | 0 | 1 | 0 | 0 | 0 | 0 |
| 215659_at    | GSDMB          | Gasdermin B                                                        | -0.22 | -0.44 | -0.28 | 0.20  | 1 | 1 | 0 | 0  | 0 | 1 | 0 | 1 | 0 | 0 | 1 | 1 |
| 1558710_at   | ARIH1          | ariadne homolog, ubiquitin-conjugating enzyme E2 binding pro       | -0.29 | -0.57 | -0.32 | 0.08  | 1 | 1 | 0 | -1 | 0 | 1 | 0 | 1 | 0 | 0 | 0 | 1 |
| 216121_at    | PUM2           | pumilio homolog 2 (Drosophila)                                     | -0.87 | -1.13 | -0.64 | -0.47 | 1 | 1 | 0 | -1 | 0 | 0 | 0 | 1 |   |   |   |   |



|              |               |                                                                  |       |       |       |       |   |   |    |    |    |    |   |   |   |   |   |   |
|--------------|---------------|------------------------------------------------------------------|-------|-------|-------|-------|---|---|----|----|----|----|---|---|---|---|---|---|
| 207674_at    | FCAR          | Fc fragment of IgA, receptor for                                 | -0.87 | -1.17 | -1.62 | -1.64 | 1 | 1 | 1  | 0  | 0  | 0  | 1 | 1 | 0 | 0 | 0 | 1 |
| 210146_x_at  | LILRB2        | leukocyte immunoglobulin-like receptor, subfamily B (with TM     | -1.45 | -1.68 | -1.93 | -2.15 | 1 | 1 | 1  | 0  | 0  | -1 | 0 | 1 | 0 | 0 | 0 | 1 |
| 207852_at    | CXCL5         | chemokine (C-X-C motif) ligand 5                                 | -0.34 | -0.79 | -0.97 | -1.25 | 1 | 1 | 1  | 0  | 0  | -1 | 1 | 1 | 0 | 0 | 0 | 1 |
| 230748_at    | SLC16A6       | solute carrier family 16, member 6 (monocarboxylic acid transp   | -1.42 | -1.65 | -2.09 | -2.09 | 1 | 1 | 1  | 0  | 0  | 0  | 1 | 1 | 0 | 0 | 0 | 1 |
| 204924_at    | TLR2          | toll-like receptor 2                                             | -0.58 | -0.88 | -1.28 | -1.31 | 1 | 1 | 1  | 0  | 0  | 0  | 1 | 1 | 0 | 0 | 0 | 1 |
| 202888_s_at  | ANPEP         | alanyl (membrane) aminopeptidase                                 | -1.46 | -1.77 | -2.15 | -2.20 | 1 | 1 | 1  | 0  | 0  | 0  | 1 | 1 | 0 | 0 | 0 | 1 |
| 206710_s_at  | EPB41L3       | erythrocyte membrane protein band 4.1-like 3                     | -1.32 | -1.57 | -1.85 | -1.99 | 1 | 1 | 1  | 0  | 0  | 0  | 1 | 1 | 0 | 0 | 0 | 1 |
| 212681_at    | EPB41L3       | erythrocyte membrane protein band 4.1-like 3                     | -1.30 | -1.52 | -1.88 | -1.94 | 1 | 1 | 1  | 0  | 0  | 0  | 1 | 1 | 0 | 0 | 0 | 1 |
| 213338_at    | TMEM158       | transmembrane protein 158 (gene/pseudogene)                      | -0.44 | -0.61 | -1.10 | -1.03 | 1 | 1 | 1  | 0  | 0  | 0  | 1 | 1 | 0 | 0 | 0 | 1 |
| 214183_s_at  | TKTL1         | transketolase-like 1                                             | -2.55 | -2.90 | -3.09 | -3.32 | 1 | 1 | 1  | 0  | 0  | -1 | 1 | 1 | 0 | 0 | 0 | 1 |
| 214974_x_at  | CXCL5         | chemokine (C-X-C motif) ligand 5                                 | -0.18 | -0.50 | -0.85 | -0.92 | 1 | 1 | 1  | 0  | 0  | 0  | 1 | 1 | 0 | 0 | 0 | 1 |
| 202856_s_at  | SLC16A3       | solute carrier family 16, member 3 (monocarboxylic acid transp   | -1.26 | -1.04 | -1.20 | -1.44 | 1 | 1 | 0  | 0  | 0  | -1 | 0 | 1 | 0 | 0 | 0 | 0 |
| 219607_s_at  | MS44AA        | membrane-spanning 4-domains, subfamily A, member 4               | -3.52 | -3.77 | -3.95 | -4.17 | 1 | 1 | 1  | 0  | 0  | -1 | 0 | 1 | 0 | 0 | 0 | 1 |
| 223344_s_at  | MS4A7         | membrane-spanning 4-domains, subfamily A, member 7               | -1.07 | -1.29 | -1.43 | -1.69 | 1 | 1 | 1  | 0  | 0  | -1 | 0 | 1 | 0 | 0 | 0 | 1 |
| 1559910_at   | PID1          | phosphotyrosine interaction domain containing 1                  | -1.08 | -1.34 | -1.72 | -1.73 | 1 | 1 | 1  | 0  | 0  | 0  | 1 | 1 | 0 | 0 | 0 | 1 |
| 206214_at    | PLA2G7        | phospholipase A2, group VII (platelet-activating factor acetylhy | -2.72 | -3.05 | -3.19 | -3.43 | 1 | 1 | 1  | 0  | 0  | -1 | 1 | 1 | 0 | 0 | 0 | 1 |
| 226066_at    | MITF          | microphthalmia-associated transcription factor                   | -1.65 | -1.71 | -2.33 | -2.10 | 1 | 1 | 0  | 0  | -1 | 0  | 1 | 1 | 1 | 0 | 0 | 1 |
| 219434_at    | TREM1         | triggering receptor expressed on myeloid cells 1                 | -1.88 | -2.07 | -2.45 | -2.45 | 1 | 1 | 1  | 0  | 0  | 0  | 1 | 1 | 0 | 0 | 0 | 1 |
| 239336_at    | Thbs1         | thrombospondin 1                                                 | -0.04 | -0.02 | -0.05 | -0.41 | 1 | 1 | 0  | 0  | 0  | -1 | 0 | 1 | 0 | 0 | 1 | 1 |
| 208303_s_at  | CRLF2         | cytokine receptor-like factor 2                                  | -0.64 | -0.56 | -0.71 | -0.92 | 1 | 1 | 0  | 0  | 0  | -1 | 0 | 1 | 0 | 0 | 0 | 1 |
| 222877_at    | NRP2          | neuropilin 2                                                     | -1.34 | -1.06 | -1.43 | -1.42 | 1 | 1 | 0  | 1  | 0  | 0  | 0 | 1 | 1 | 1 | 0 | 0 |
| 1562194_at   | Zeb2          | zinc finger E-box binding homeobox 2                             | -0.89 | -0.88 | -1.01 | -1.23 | 1 | 1 | 0  | 0  | 0  | -1 | 0 | 1 | 0 | 0 | 0 | 1 |
| 235751_s_at  | VMO1          | vitelline membrane outer layer 1 homolog (chicken)               | -1.72 | -1.96 | -2.09 | -2.32 | 1 | 1 | 1  | 0  | 0  | -1 | 0 | 1 | 0 | 0 | 0 | 1 |
| 204122_at    | TYROBP        | TYRO protein tyrosine kinase binding protein                     | -1.53 | -1.75 | -2.06 | -2.09 | 1 | 1 | 1  | 0  | 0  | 0  | 1 | 1 | 0 | 0 | 0 | 1 |
| 204232_at    | FCER1G        | Fc fragment of IgE, high affinity I, receptor for; gamma polypep | -1.48 | -1.67 | -1.82 | -2.00 | 1 | 1 | 1  | 0  | 0  | -1 | 0 | 1 | 0 | 0 | 0 | 1 |
| 217997_at    | PHLDA1        | pleckstrin homology-like domain, family A, member 1              | -1.60 | -1.78 | -2.13 | -2.11 | 1 | 1 | 0  | 0  | 0  | 0  | 1 | 1 | 0 | 0 | 0 | 1 |
| 223343_at    | MS4A7         | membrane-spanning 4-domains, subfamily A, member 7               | -1.16 | -1.34 | -1.53 | -1.67 | 1 | 1 | 1  | 0  | 0  | 0  | 0 | 1 | 0 | 0 | 0 | 1 |
| 1554899_s_at | FCER1G        | Fc fragment of IgE, high affinity I, receptor for; gamma polypep | -1.58 | -1.79 | -1.93 | -2.11 | 1 | 1 | 1  | 0  | 0  | -1 | 0 | 1 | 0 | 0 | 0 | 1 |
| 204015_s_at  | DUSP4         | dual specificity phosphatase 4                                   | -0.91 | -1.16 | -1.21 | -1.48 | 1 | 1 | 1  | 0  | 0  | -1 | 0 | 1 | 0 | 0 | 1 | 1 |
| 234932_s_at  | CDCP1         | CUB domain containing protein 1                                  | -0.04 | -0.07 | -0.12 | -0.39 | 1 | 1 | 0  | 0  | 0  | -1 | 0 | 1 | 0 | 0 | 1 | 1 |
| 202855_s_at  | SLC16A3       | solute carrier family 16, member 3 (monocarboxylic acid transp   | -1.35 | -1.22 | -1.34 | -1.52 | 1 | 1 | 0  | 0  | 0  | -1 | 0 | 1 | 0 | 0 | 0 | 0 |
| 206881_s_at  | LILRA3        | leukocyte immunoglobulin-like receptor, subfamily A (without     | -0.76 | -0.95 | -0.97 | -1.26 | 1 | 1 | 1  | 0  | 0  | -1 | 0 | 1 | 0 | 0 | 1 | 1 |
| 211816_x_at  | FCAR          | Fc fragment of IgA, receptor for                                 | -0.48 | -0.64 | -0.65 | -0.96 | 1 | 1 | 0  | 0  | 0  | -1 | 0 | 1 | 0 | 0 | 1 | 1 |
| 224480_s_at  | AGPAT9        | 1-acylglycerol-3-phosphate O-acyltransferase 9                   | -1.65 | -1.58 | -2.11 | -1.89 | 1 | 1 | 0  | 0  | -1 | 0  | 1 | 1 | 1 | 0 | 0 | 0 |
| 200730_s_at  | PTP4A1        | protein tyrosine phosphatase type IVA, member 1                  | 0.02  | 0.09  | -0.01 | -0.21 | 1 | 1 | 0  | 0  | 0  | -1 | 0 | 1 | 0 | 0 | 0 | 0 |
| 219558_at    | ATP13A3       | ATPase type 13A3                                                 | -1.37 | -1.01 | -1.23 | -1.32 | 1 | 1 | 0  | 1  | 0  | 0  | 0 | 1 | 0 | 1 | 0 | 0 |
| 226034_at    | DUSP4         | dual specificity phosphatase 4                                   | -1.02 | -1.17 | -1.27 | -1.47 | 1 | 1 | 0  | 0  | 0  | -1 | 0 | 1 | 0 | 0 | 0 | 1 |
| 1553396_a_at | CCDC13        | coiled-coil domain containing 13                                 | 0.45  | 0.76  | 0.58  | 0.47  | 1 | 1 | 0  | 1  | 0  | 0  | 0 | 1 | 0 | 1 | 0 | 0 |
| 1570364_at   | ZNF709        | zinc finger protein 709                                          | 0.32  | 0.57  | 0.24  | 0.28  | 1 | 1 | 0  | 1  | 0  | 0  | 0 | 1 | 1 | 0 | 0 | 0 |
| 222670_s_at  | MAFB          | v-maf musculoaponeurotic fibrosarcoma oncogene homolog B         | -0.77 | -1.10 | -1.25 | -1.39 | 1 | 1 | 1  | 0  | 0  | 0  | 1 | 1 | 0 | 1 | 0 | 1 |
| 210773_s_at  | FPR2          | formyl peptide receptor 2                                        | -0.81 | -1.07 | -0.94 | -1.35 | 1 | 1 | 0  | 0  | 0  | -1 | 0 | 1 | 0 | 0 | 1 | 1 |
| 205126_at    | VRK2          | vaccinia related kinase 2                                        | -1.07 | -1.26 | -1.42 | -1.53 | 1 | 1 | 1  | 0  | 0  | 0  | 0 | 1 | 0 | 0 | 0 | 1 |
| 224829_at    | CPEB4         | cytoplasmic polyadenylation element binding protein 4            | -0.87 | -0.69 | -0.86 | -0.96 | 1 | 1 | 0  | 1  | 0  | 0  | 0 | 1 | 0 | 0 | 0 | 0 |
| 1560225_at   | CNR1          | Cannabinoid receptor 1 (brain)                                   | -0.34 | -0.27 | -0.25 | -0.01 | 1 | 1 | 0  | 0  | 0  | 1  | 0 | 1 | 0 | 0 | 0 | 1 |
| 1560762_at   | LOC285972     | hypothetical LOC285972                                           | -0.30 | -0.06 | -0.18 | 0.20  | 1 | 1 | 0  | 0  | 0  | 1  | 0 | 1 | 0 | 0 | 1 | 1 |
| 1560869_a_at | ---           | ---                                                              | -1.83 | -1.72 | -1.75 | -1.45 | 1 | 1 | 0  | 0  | 0  | -1 | 0 | 1 | 0 | 0 | 1 | 1 |
| 1561654_at   | LIMK2         | LIM domain kinase 2                                              | -0.13 | -0.18 | -0.15 | 0.10  | 1 | 1 | 0  | 0  | 0  | 1  | 0 | 1 | 0 | 0 | 0 | 0 |
| 1566825_at   | ---           | ---                                                              | -0.41 | -0.27 | -0.33 | 0.00  | 1 | 1 | 0  | 0  | 0  | 1  | 0 | 1 | 0 | 0 | 1 | 1 |
| 1570507_at   | SFRS2IP       | Splicing factor, arginine/serine-rich 2, interacting protein     | 0.11  | -0.06 | 0.12  | 0.21  | 1 | 1 | 0  | -1 | 0  | 0  | 0 | 1 | 0 | 0 | 0 | 0 |
| 227168_at    | MIAT          | myocardial infarction associated transcript (non-protein coding  | 0.41  | 0.39  | 0.40  | 0.67  | 1 | 1 | 0  | 0  | 0  | 1  | 0 | 1 | 0 | 0 | 1 | 0 |
| 204866_at    | PHF16         | PHD finger protein 16                                            | -0.39 | -0.30 | -0.34 | -0.01 | 1 | 1 | 0  | 0  | 0  | 1  | 0 | 1 | 0 | 0 | 1 | 1 |
| 205174_s_at  | QPCT          | glutaminy-peptide cyclotransferase                               | -1.83 | -1.78 | -1.85 | -1.50 | 1 | 1 | 0  | 0  | 0  | 1  | 0 | 1 | 0 | 0 | 1 | 1 |
| 207533_at    | CCL1          | chemokine (C-C motif) ligand 1                                   | 0.41  | 0.66  | 0.54  | 0.94  | 1 | 1 | 0  | 0  | 0  | 1  | 0 | 1 | 0 | 0 | 1 | 1 |
| 215170_s_at  | CEP152        | centrosomal protein 152kDa                                       | -0.16 | -0.25 | -0.32 | 0.03  | 1 | 1 | 0  | 0  | 0  | 1  | 0 | 1 | 0 | 0 | 1 | 0 |
| 244219_at    | WTAP          | Wilms tumor 1 associated protein                                 | -0.13 | -0.41 | -0.18 | -0.13 | 1 | 1 | 0  | -1 | 0  | 0  | 0 | 1 | 0 | 1 | 0 | 0 |
| 244546_at    | CYCS          | cytochrome c, somatic                                            | -0.46 | -0.35 | -0.42 | -0.07 | 1 | 1 | 0  | 0  | 0  | 1  | 0 | 1 | 0 | 0 | 1 | 1 |
| 1559762_at   | ---           | ---                                                              | -0.18 | -0.17 | -0.08 | 0.12  | 1 | 1 | 0  | 0  | 0  | -1 | 0 | 1 | 0 | 0 | 0 | 1 |
| 1566603_s_at | RPUSD3        | RNA pseudouridylylase synthase domain containing 3               | -0.33 | -0.27 | -0.28 | 0.02  | 1 | 1 | 0  | 0  | 0  | 1  | 0 | 1 | 0 | 0 | 1 | 1 |
| 206983_at    | CCR6          | chemokine (C-C motif) receptor 6                                 | -0.34 | -0.36 | -0.28 | -0.08 | 1 | 1 | 0  | 0  | 0  | 1  | 0 | 1 | 0 | 0 | 0 | 0 |
| 226694_at    | AKAP2 /// PAL | A kinase (PRKA) anchor protein 2 /// PALM2-AKAP2 readthroug      | -0.80 | -0.58 | -0.58 | -0.29 | 1 | 1 | -1 | 0  | 0  | 1  | 0 | 1 | 0 | 0 | 1 | 1 |
| 207819_s_at  | ABCB4         | ATP-binding cassette, sub-family B (MDR/TAP), member 4           | -0.11 | -0.16 | -0.07 | 0.14  | 1 | 1 | 0  | 0  | 0  | 1  | 0 | 1 | 0 | 0 | 0 | 0 |
| 228304_at    | RBM43         | RNA binding motif protein 43                                     | 0.12  | -0.08 | 0.12  | 0.22  | 1 | 1 | 0  | -1 | 0  | 0  | 0 | 1 | 0 | 0 | 0 | 0 |
| 1556423_at   | VASH1         | Vasohibin 1                                                      | -0.87 | -0.82 | -0.82 | -0.52 | 1 | 1 | 0  | 0  | 0  | 1  | 0 | 1 | 0 | 0 | 1 | 1 |
| 1569263_at   | ---           | ---                                                              | -0.02 | 0.03  | 0.14  | 0.34  | 1 | 1 | 0  | 0  | 0  | 1  | 0 | 1 | 0 | 0 | 0 | 1 |
| 215118_s_at  | IGHA1         | Immunoglobulin heavy constant alpha 1                            | -0.24 | -0.25 | -0.14 | 0.07  | 1 | 1 | 0  | 0  | 0  | 1  | 0 | 1 | 0 | 0 | 0 | 1 |
| 202760_s_at  | AKAP2 /// PAL | A kinase (PRKA) anchor protein 2 /// PALM2-AKAP2 readthroug      | -0.75 | -0.57 | -0.42 | -0.24 | 1 | 1 | -1 | 0  | 0  | 1  | 1 | 1 | 0 | 0 | 0 | 1 |
| 231956_at    | RNF213        | ring finger protein 213                                          | -0.06 | -0.19 | -0.06 | 0.14  | 1 | 1 | 0  | 0  | 0  | 1  | 0 | 1 | 0 | 0 | 0 | 0 |
| 233121_at    | ZHX2          | zinc fingers and homeoboxes 2                                    | -0.26 | -0.32 | -0.24 | 0.01  | 1 | 1 | 0  | 0  | 0  | 1  | 0 | 1 | 0 | 0 | 0 | 1 |
| 228055_at    | NAPSB         | napsin B aspartic peptidase pseudogene                           | -0.35 | -0.31 | -0.20 | 0.03  | 1 | 1 | 0  | 0  | 0  | 1  | 0 | 1 | 0 | 0 | 0 | 1 |
| 220704_at    | IKZF1         | IKAROS family zinc finger 1 (Ikaros)                             | 0.30  | 0.28  | 0.32  | 0.63  | 1 | 1 | 0  | 0  | 0  | 1  | 0 | 1 | 0 | 0 | 1 | 1 |
| 228056_s_at  | NAPSB         | napsin B aspartic peptidase pseudogene                           | -0.41 | -0.36 | -0.36 | -0.01 | 1 | 1 | 0  | 0  | 0  | 1  | 0 | 1 | 0 | 0 | 1 | 1 |
| 232319_at    | GGPS1         | geranylgeranyl diphosphate synthase 1                            | -0.15 | -0.23 | -0.15 | 0.13  | 1 | 1 | 0  | 0  | 0  | 1  | 0 | 1 | 0 | 0 | 1 | 1 |
| 1556461_at   | Klf12         | Kruppel-like factor 12                                           | 0.11  | -0.13 | 0.16  | 0.23  | 1 | 1 | 0  | -1 | 0  | 0  | 0 | 1 | 0 | 0 | 0 | 0 |
| 206157_at    | PTX3          | pentraxin 3, long                                                | 0.76  | 1.00  | 0.91  | 1.37  | 1 | 1 | 0  | 0  | 0  | 1  | 0 | 1 | 0 | 0 | 1 | 1 |
| 242234_at    | XAF1          | XIAP associated factor 1                                         | 0.38  | -0.08 | 0.13  | 0.36  | 1 | 1 | 0  | -1 | 0  | 0  | 0 | 1 | 0 | 1 | 0 | 0 |
| 244780_at    | SGPP2         | sphingosine-1-phosphate phosphatase 2                            | -0.26 | -0.46 | -0.22 | -0.01 | 1 | 1 | 0  | -1 | 0  | 0  | 1 | 0 | 1 | 0 | 0 | 0 |
| 232584_at    | TSHZ2         | teashirt zinc finger homeobox 2                                  | 0.36  | 0.20  | 0.32  | 0.66  | 1 | 1 | 0  | 0  | 0  | 1  | 0 | 1 | 0 | 0 | 1 | 1 |
| 213436_at    | CNR1          | cannabinoid receptor 1 (brain)                                   | -1.02 | -1.03 | -0.91 | -0.46 | 1 | 1 | 0  | 0  | 0  | 1  | 0 | 1 | 0 | 0 | 1 | 1 |
| 210118_s_at  | IL1A          | interleukin 1, alpha                                             | 1.81  | 1.38  | 1.46  | 1.03  | 0 | 1 | 1  | 0  | 0  | -1 | 0 | 0 | 0 | 1 | 1 | 1 |
| 1558404_at   | LOC644242     | hypothetical LOC644242                                           | -1.59 | -1.27 | -1.90 | -1.60 | 1 | 1 | 0  | 1  | -1 | 0  | 0 | 0 | 1 | 0 | 0 | 0 |
| 204748_at    | PTGS2         | prostaglandin-endoperoxide synthase 2 (prostaglandin G/H syn     | 0.87  | 0.66  | 0.50  | 0.34  | 0 | 1 | 1  | 0  | 0  | 0  | 0 | 0 | 0 | 0 | 0 | 1 |
| 1557267_s_at | LOC284952     | hypothetical protein LOC284952                                   | -0.21 | 0.28  | 0.27  | 0.03  | 1 | 1 | -1 | 0  | 0  | 0  | 1 | 0 | 0 | 1 | 0 | 0 |
| 202876_s_at  | PBX2          | pre-B-cell leukemia homeobox 2                                   | 0.48  | 0.54  | 0.55  | 0.28  | 0 | 1 | 0  | 0  |    |    |   |   |   |   |   |   |



|              |               |                                                                   |       |       |       |       |   |   |    |   |    |    |   |   |   |   |   |   |
|--------------|---------------|-------------------------------------------------------------------|-------|-------|-------|-------|---|---|----|---|----|----|---|---|---|---|---|---|
| 1561754_at   | FLJ44253      | hypothetical gene supported by AK096952; AK126241; BC0685         | 1.25  | 0.98  | 1.44  | 0.77  | 0 | 1 | 0  | 0 | 1  | -1 | 0 | 0 | 0 | 0 | 1 | 1 |
| 1562836_at   | DDX6          | DEAD (Asp-Glu-Ala-Asp) box polypeptide 6                          | 0.08  | 0.10  | 0.30  | -0.11 | 0 | 1 | 0  | 0 | 1  | -1 | 0 | 0 | 0 | 0 | 1 | 0 |
| 209921_at    | SLC7A11       | solute carrier family 7, (cationic amino acid transporter, y+ sys | -1.63 | -1.59 | -2.08 | -1.80 | 1 | 1 | 0  | 0 | -1 | 0  | 1 | 0 | 1 | 0 | 1 | 0 |
| 211074_at    | FOLR1         | folate receptor 1 (adult)                                         | -0.15 | 0.30  | 0.21  | 0.08  | 1 | 1 | -1 | 0 | 0  | 0  | 1 | 0 | 0 | 0 | 1 | 0 |
| 211429_s_at  | SERPINA1      | serpin peptidase inhibitor, clade A (alpha-1 antiproteinase, ant  | -0.79 | -0.87 | -0.83 | -1.08 | 0 | 1 | 0  | 0 | 0  | -1 | 0 | 0 | 0 | 0 | 0 | 1 |
| 212249_at    | PIK3R1        | phosphoinositide-3-kinase, regulatory subunit 1 (alpha)           | -0.62 | -0.20 | -0.23 | -0.41 | 1 | 1 | -1 | 0 | 0  | 0  | 1 | 0 | 0 | 0 | 1 | 0 |
| 215352_at    | GIMAP5        | GTPase, IMAP family member 5                                      | -0.06 | 0.53  | 0.40  | 0.33  | 1 | 1 | -1 | 0 | 0  | 0  | 1 | 0 | 0 | 0 | 1 | 0 |
| 226036_x_at  | CASP2         | caspase 2, apoptosis-related cysteine peptidase                   | 0.50  | 0.42  | 0.56  | 0.21  | 0 | 1 | 0  | 0 | 0  | -1 | 0 | 0 | 0 | 0 | 1 | 1 |
| 243296_at    | NAMPT         | Nicotinamide phosphoribosyltransferase                            | 0.01  | -0.23 | -0.32 | -0.45 | 0 | 1 | 1  | 0 | 0  | 0  | 1 | 0 | 0 | 0 | 0 | 1 |
| 201631_s_at  | IER3          | immediate early response 3                                        | -0.33 | -0.52 | -0.71 | -0.72 | 0 | 1 | 1  | 0 | 0  | 0  | 1 | 0 | 0 | 0 | 0 | 1 |
| 210818_s_at  | BACH1         | BTB and CNC homology 1, basic leucine zipper transcription fac    | -0.50 | -0.20 | -0.43 | -0.40 | 1 | 1 | 0  | 1 | 0  | 0  | 0 | 0 | 0 | 0 | 1 | 0 |
| 213005_s_at  | KANK1         | KN motif and ankyrin repeat domains 1                             | -0.81 | -0.78 | -1.16 | -0.98 | 1 | 1 | 0  | 0 | -1 | 0  | 1 | 0 | 1 | 0 | 0 | 0 |
| 227613_at    | ZNF331        | zinc finger protein 331                                           | -0.21 | -0.32 | -0.21 | -0.51 | 0 | 1 | 0  | 0 | 0  | -1 | 0 | 0 | 0 | 0 | 1 | 1 |
| 229274_at    | GNAS          | GNAS complex locus                                                | 0.07  | 0.47  | 0.46  | 0.27  | 1 | 1 | -1 | 0 | 0  | 0  | 1 | 0 | 0 | 0 | 1 | 0 |
| 200628_s_at  | WARS          | tryptophanyl-tRNA synthetase                                      | 0.05  | -0.03 | 0.00  | -0.22 | 0 | 1 | 0  | 0 | 0  | -1 | 0 | 0 | 0 | 0 | 0 | 1 |
| 202388_at    | RGS2          | regulator of G-protein signaling 2, 24kDa                         | 0.31  | 0.11  | 0.18  | -0.08 | 0 | 1 | 0  | 0 | 0  | -1 | 0 | 0 | 0 | 0 | 0 | 1 |
| 204103_at    | CCL4          | chemokine (C-C motif) ligand 4                                    | 1.23  | 0.93  | 0.97  | 0.74  | 1 | 1 | 1  | 0 | 0  | -1 | 0 | 0 | 0 | 0 | 1 | 0 |
| 205731_s_at  | NCOA2         | nuclear receptor coactivator 2                                    | 0.19  | 0.29  | 0.52  | 0.11  | 0 | 1 | 0  | 0 | 1  | 0  | 1 | 0 | 0 | 0 | 1 | 0 |
| 219788_at    | PILRA         | paired immunoglobulin-like type 2 receptor alpha                  | -1.24 | -1.41 | -1.38 | -1.60 | 0 | 1 | 0  | 0 | 0  | -1 | 0 | 0 | 0 | 0 | 0 | 1 |
| 231697_s_at  | TMEM49        | transmembrane protein 49                                          | -0.47 | -0.10 | -0.16 | -0.29 | 1 | 1 | -1 | 0 | 0  | 0  | 1 | 0 | 0 | 0 | 1 | 0 |
| 235476_at    | TRIM59        | tripartite motif-containing 59                                    | -0.52 | 0.02  | 0.00  | -0.17 | 1 | 1 | -1 | 0 | 0  | 0  | 1 | 0 | 0 | 0 | 1 | 0 |
| 236876_at    | H1FNT         | H1 histone family, member N, testis-specific                      | 0.12  | 0.10  | 0.18  | -0.08 | 0 | 1 | 0  | 0 | 0  | -1 | 0 | 0 | 0 | 0 | 0 | 1 |
| 241315_at    | FILIP1L       | filamin A interacting protein 1-like                              | 0.52  | 0.50  | 0.62  | 0.30  | 0 | 1 | 0  | 0 | 0  | -1 | 0 | 0 | 0 | 0 | 1 | 0 |
| 243648_at    | ZBED6         | zinc finger, BED-type containing 6                                | -0.45 | 0.06  | -0.08 | -0.13 | 1 | 1 | -1 | 0 | 0  | 0  | 1 | 0 | 0 | 0 | 1 | 0 |
| 201668_x_at  | MARCKS        | myristoylated alanine-rich protein kinase C substrate             | 0.40  | 0.40  | 0.56  | 0.22  | 0 | 1 | 0  | 0 | 0  | -1 | 0 | 0 | 0 | 0 | 1 | 0 |
| 204794_at    | DUSP2         | dual specificity phosphatase 2                                    | 0.17  | 0.03  | 0.04  | -0.15 | 0 | 1 | 0  | 0 | 0  | -1 | 0 | 0 | 0 | 0 | 0 | 1 |
| 207219_at    | ZNF643        | zinc finger protein 643                                           | -0.46 | -0.17 | -0.41 | -0.35 | 1 | 1 | 0  | 1 | 0  | 0  | 0 | 0 | 0 | 0 | 1 | 0 |
| 214567_s_at  | XCL1 /// XCL2 | chemokine (C motif) ligand 1 /// chemokine (C motif) ligand 2     | 0.71  | 0.54  | 0.59  | 0.35  | 0 | 1 | 0  | 0 | 0  | -1 | 0 | 0 | 0 | 0 | 0 | 1 |
| 219653_at    | LSM14B        | LSM14B, SCD6 homolog B (S. cerevisiae)                            | 0.44  | 0.34  | 0.48  | 0.16  | 0 | 1 | 0  | 0 | 0  | -1 | 0 | 0 | 0 | 0 | 1 | 1 |
| 230180_at    | DDX17         | DEAD (Asp-Glu-Ala-Asp) box polypeptide 17                         | -0.54 | -0.04 | 0.01  | -0.22 | 1 | 1 | -1 | 0 | 0  | 0  | 1 | 0 | 0 | 0 | 1 | 0 |
| 240773_at    | TRIO          | triple functional domain (PTPRF interacting)                      | -1.29 | -0.91 | -1.12 | -1.09 | 1 | 1 | 0  | 1 | 0  | 0  | 0 | 0 | 0 | 0 | 1 | 0 |
| 206180_x_at  | ZNF747        | zinc finger protein 747                                           | 0.37  | 0.33  | 0.43  | 0.15  | 0 | 1 | 0  | 0 | 0  | -1 | 0 | 0 | 0 | 0 | 1 | 0 |
| 212762_s_at  | TCF7L2        | transcription factor 7-like 2 (T-cell specific, HMG-box)          | -0.59 | -0.28 | -0.49 | -0.46 | 1 | 1 | 0  | 1 | 0  | 0  | 0 | 0 | 0 | 0 | 1 | 0 |
| 217678_at    | SLC7A11       | solute carrier family 7, (cationic amino acid transporter, y+ sys | -1.78 | -1.71 | -2.21 | -1.89 | 1 | 1 | 0  | 0 | -1 | 0  | 1 | 0 | 1 | 0 | 1 | 0 |
| 223999_at    | PPIL2         | peptidylprolyl isomerase (cyclophilin)-like 2                     | -0.07 | 0.33  | 0.15  | 0.16  | 1 | 1 | -1 | 0 | 0  | 0  | 0 | 0 | 0 | 0 | 1 | 0 |
| 237332_at    | MON2          | MON2 homolog (S. cerevisiae)                                      | -0.64 | -0.08 | -0.32 | -0.25 | 1 | 1 | -1 | 1 | 0  | 0  | 0 | 0 | 0 | 0 | 1 | 0 |
| 201266_at    | TXNRD1        | thioredoxin reductase 1                                           | -1.18 | -0.96 | -1.36 | -1.12 | 1 | 1 | 0  | 0 | -1 | 0  | 0 | 0 | 1 | 0 | 0 | 0 |
| 202912_at    | ADM           | adrenomedullin                                                    | -1.21 | -1.24 | -1.57 | -1.39 | 1 | 1 | 0  | 0 | -1 | 0  | 1 | 0 | 1 | 0 | 0 | 0 |
| 207528_s_at  | SLC7A11       | solute carrier family 7, (cationic amino acid transporter, y+ sys | -1.75 | -1.58 | -2.02 | -1.74 | 1 | 1 | 0  | 0 | -1 | 0  | 0 | 0 | 1 | 0 | 1 | 0 |
| 212107_s_at  | DHX9          | DEAH (Asp-Glu-Ala-His) box polypeptide 9                          | -0.44 | -0.05 | -0.04 | -0.21 | 1 | 1 | -1 | 0 | 0  | 0  | 1 | 0 | 0 | 0 | 1 | 0 |
| 214305_s_at  | SF3B1         | splicing factor 3b, subunit 1, 155kDa                             | -0.22 | 0.23  | 0.19  | 0.07  | 1 | 1 | -1 | 0 | 0  | 0  | 1 | 0 | 0 | 0 | 1 | 0 |
| 216433_s_at  | PRDM2         | PR domain containing 2, with ZNF domain                           | -0.39 | -0.04 | -0.21 | -0.19 | 1 | 1 | -1 | 0 | 0  | 0  | 0 | 0 | 0 | 0 | 1 | 0 |
| 222527_s_at  | RBM22         | RNA binding motif protein 22                                      | -0.29 | -0.11 | 0.11  | -0.28 | 0 | 1 | 0  | 0 | 1  | 0  | 1 | 0 | 0 | 0 | 1 | 0 |
| 222562_s_at  | TNKS2         | tankyrase, TRF1-interacting ankyrin-related ADP-ribose polyme     | -0.22 | 0.17  | 0.19  | 0.01  | 1 | 1 | -1 | 0 | 0  | 0  | 1 | 0 | 0 | 0 | 1 | 0 |
| 224775_at    | IWS1          | IWS1 homolog (S. cerevisiae)                                      | -0.12 | 0.00  | 0.23  | -0.15 | 0 | 1 | 0  | 0 | 1  | 0  | 1 | 0 | 0 | 0 | 1 | 0 |
| 235645_at    | ESCO1         | establishment of cohesion 1 homolog 1 (S. cerevisiae)             | -0.13 | 0.20  | 0.40  | 0.05  | 1 | 1 | -1 | 0 | 0  | 1  | 0 | 0 | 0 | 0 | 1 | 0 |
| 236005_at    | Klf12         | Kruppel-like factor 12                                            | -0.01 | 0.36  | 0.41  | 0.20  | 1 | 1 | -1 | 0 | 0  | 0  | 1 | 0 | 0 | 0 | 1 | 0 |
| 238563_at    | Abi1          | abi-interactor 1                                                  | -0.16 | 0.21  | 0.02  | 0.04  | 1 | 1 | -1 | 0 | 0  | 0  | 0 | 0 | 0 | 0 | 1 | 0 |
| 1564002_a_at | AKD1          | adenylate kinase domain containing 1                              | -0.17 | 0.16  | 0.20  | 0.01  | 1 | 1 | -1 | 0 | 0  | 0  | 1 | 0 | 0 | 0 | 1 | 0 |
| 216361_s_at  | MYST3         | MYST histone acetyltransferase (monocytic leukemia) 3             | -0.53 | -0.18 | 0.06  | -0.32 | 1 | 1 | -1 | 0 | 1  | 0  | 1 | 0 | 0 | 0 | 1 | 0 |
| 222576_s_at  | EIF2C1        | eukaryotic translation initiation factor 2C, 1                    | -0.12 | 0.06  | 0.25  | -0.09 | 0 | 1 | 0  | 0 | 1  | 0  | 1 | 0 | 0 | 0 | 1 | 0 |
| 231897_at    | PTGR1         | prostaglandin reductase 1                                         | -1.76 | -1.63 | -2.00 | -1.78 | 1 | 1 | 0  | 0 | -1 | 0  | 0 | 0 | 1 | 0 | 0 | 0 |
| 201070_x_at  | SF3B1         | splicing factor 3b, subunit 1, 155kDa                             | -0.25 | 0.16  | 0.14  | 0.02  | 1 | 1 | -1 | 0 | 0  | 0  | 1 | 0 | 0 | 0 | 1 | 0 |
| 201868_s_at  | TBL1X         | transducin (beta)-like 1X-linked                                  | -0.52 | -0.10 | -0.16 | -0.24 | 1 | 1 | -1 | 0 | 0  | 0  | 1 | 0 | 0 | 0 | 1 | 0 |
| 211022_s_at  | ATRX          | alpha thalassemia/mental retardation syndrome X-linked            | -0.43 | -0.07 | 0.04  | -0.21 | 1 | 1 | -1 | 0 | 0  | 0  | 1 | 0 | 0 | 0 | 1 | 0 |
| 211899_s_at  | TRAF4         | TNF receptor-associated factor 4                                  | -0.02 | 0.02  | 0.22  | -0.12 | 0 | 1 | 0  | 0 | 1  | 0  | 0 | 0 | 0 | 0 | 1 | 0 |
| 231235_at    | NKTR          | natural killer-tumor recognition sequence                         | -0.72 | -0.08 | -0.27 | -0.22 | 1 | 1 | -1 | 0 | 0  | 1  | 0 | 0 | 0 | 0 | 1 | 0 |
| 235568_at    | C19orf59      | chromosome 19 open reading frame 59                               | -3.07 | -2.99 | -3.31 | -3.14 | 1 | 1 | 0  | 0 | -1 | 0  | 0 | 0 | 1 | 0 | 0 | 0 |
| 236946_at    | Gpr75         | G protein-coupled receptor 75                                     | -0.59 | -0.16 | -0.31 | -0.30 | 1 | 1 | -1 | 0 | 0  | 0  | 1 | 0 | 0 | 0 | 1 | 0 |
| 236962_at    | ptbp2         | polypyrimidine tract binding protein 2                            | -0.77 | -0.02 | 0.06  | -0.16 | 1 | 1 | -1 | 0 | 0  | 0  | 1 | 0 | 0 | 0 | 1 | 0 |
| 239014_at    | CCAR1         | Cell division cycle and apoptosis regulator 1                     | 0.18  | 0.50  | 0.39  | 0.35  | 1 | 1 | -1 | 0 | 0  | 0  | 0 | 0 | 0 | 0 | 1 | 0 |
| 242306_at    | TMEM165       | transmembrane protein 165                                         | -0.45 | -0.05 | -0.17 | -0.19 | 1 | 1 | -1 | 0 | 0  | 0  | 1 | 0 | 0 | 0 | 1 | 0 |
| 1558579_at   | FLJ37786      | hypothetical LOC642691                                            | 0.62  | 0.53  | 0.93  | 0.40  | 1 | 1 | 0  | 0 | 1  | 0  | 0 | 0 | 1 | 0 | 1 | 0 |
| 204864_s_at  | IL6ST         | interleukin 6 signal transducer (gp130, oncostatin M receptor)    | -0.27 | 0.08  | -0.02 | -0.04 | 1 | 1 | -1 | 0 | 0  | 0  | 0 | 0 | 0 | 0 | 1 | 0 |
| 205411_at    | STK4          | serine/threonine kinase 4                                         | -0.78 | -0.19 | -0.38 | -0.33 | 1 | 1 | -1 | 0 | 0  | 0  | 1 | 0 | 0 | 0 | 1 | 0 |
| 230681_at    | TBRG1         | transforming growth factor beta regulator 1                       | -0.14 | 0.21  | 0.17  | 0.08  | 1 | 1 | -1 | 0 | 0  | 0  | 1 | 0 | 0 | 0 | 1 | 0 |
| 233559_s_at  | WDFY1         | WD repeat and FYVE domain containing 1                            | -0.57 | -0.17 | -0.16 | -0.29 | 1 | 1 | -1 | 0 | 0  | 0  | 1 | 0 | 0 | 0 | 1 | 0 |
| 241683_at    | HECTD1        | HECT domain containing 1                                          | -0.10 | 0.15  | 0.35  | 0.02  | 0 | 1 | 0  | 0 | 1  | 0  | 1 | 0 | 0 | 0 | 1 | 0 |
| 243293_at    | ---           | ---                                                               | -0.56 | -0.08 | -0.07 | -0.21 | 1 | 1 | -1 | 0 | 0  | 0  | 1 | 0 | 0 | 0 | 1 | 0 |
| 209803_s_at  | PHLDA2        | pleckstrin homology-like domain, family A, member 2               | -0.56 | -0.44 | -0.80 | -0.56 | 1 | 1 | 0  | 0 | -1 | 0  | 0 | 0 | 1 | 0 | 0 | 0 |
| 217856_at    | RBM8A         | RNA binding motif protein 8A                                      | 0.01  | 0.36  | 0.34  | 0.24  | 1 | 1 | -1 | 0 | 0  | 0  | 1 | 0 | 0 | 0 | 1 | 0 |
| 236125_at    | DKFZP5861142  | hypothetical protein DKFZP58611420                                | -0.53 | -0.11 | -0.18 | -0.23 | 1 | 1 | -1 | 0 | 0  | 0  | 1 | 0 | 0 | 0 | 1 | 0 |
| 238281_at    | RBMS1         | RNA binding motif, single stranded interacting protein 1          | -0.35 | 0.01  | -0.04 | -0.11 | 1 | 1 | -1 | 0 | 0  | 0  | 1 | 0 | 0 | 0 | 1 | 0 |
| 238940_at    | KLF12         | Kruppel-like factor 12                                            | -0.52 | 0.01  | -0.07 | -0.11 | 1 | 1 | -1 | 0 | 0  | 0  | 1 | 0 | 0 | 0 | 1 | 0 |
| 241685_x_at  | C5orf53       | chromosome 5 open reading frame 53                                | -0.54 | -0.07 | -0.15 | -0.20 | 1 | 1 | -1 | 0 | 0  | 0  | 1 | 0 | 0 | 0 | 1 | 0 |
| 1555733_s_at | AP1S3         | adaptor-related protein complex 1, sigma 3 subunit                | 0.30  | 0.34  | 0.54  | 0.23  | 0 | 1 | 0  | 0 | 1  | 0  | 0 | 0 | 0 | 0 | 1 | 0 |
| 1560142_at   | GRIK2         | glutamate receptor, ionotropic, kainate 2                         | 0.51  | 0.57  | 0.76  | 0.46  | 0 | 1 | 0  | 0 | 1  | 0  | 0 | 0 | 0 | 0 | 1 | 0 |
| 201732_s_at  | CLCN3         | chloride channel 3                                                | -0.58 | -0.28 | -0.26 | -0.39 | 1 | 1 | -1 | 0 | 0  | 0  | 1 | 0 | 0 | 0 | 1 | 0 |
| 202887_s_at  | DDIT4         | DNA-damage-inducible transcript 4                                 | -0.12 | -0.33 | -0.36 | -0.44 | 0 | 1 | 1  | 0 | 0  | 0  | 0 | 0 | 0 | 0 | 1 | 0 |
| 207334_s_at  | TGFBR2        | transforming growth factor, beta receptor II (70/80kDa)           | -0.09 | 0.28  | 0.30  | 0.17  | 1 | 1 | -1 | 0 | 0  | 0  | 1 | 0 | 0 | 0 | 1 | 0 |
| 209675_s_at  | HNRNPUL1      | heterogeneous nuclear ribonucleoprotein U-like 1                  | 0.10  | 0.12  | 0.30  | 0.01  | 0 | 1 | 0  | 0 | 1  | 0  | 0 | 0 | 0 | 0 | 1 | 0 |
| 217234_s_at  | EZR           | ezrin                                                             | -0.07 | 0.23  | 0.31  | 0.12  | 1 | 1 | -1 | 0 | 0  | 0  | 1 | 0 | 0 | 0 | 1 | 0 |
| 228250_at    | FNIP1         | folliculin interacting protein 1                                  | -1.1  |       |       |       |   |   |    |   |    |    |   |   |   |   |   |   |



|              |               |                                                                    |       |       |       |       |   |   |    |   |    |   |   |   |   |   |   |   |
|--------------|---------------|--------------------------------------------------------------------|-------|-------|-------|-------|---|---|----|---|----|---|---|---|---|---|---|---|
| 221092_at    | IKZF3         | IKAROS family zinc finger 3 (Aiolos)                               | -0.84 | -0.29 | -0.24 | -0.37 | 1 | 1 | -1 | 0 | 0  | 0 | 1 | 0 | 0 | 1 | 0 | 1 |
| 221496_s_at  | TOB2          | transducer of ERBB2, 2                                             | -0.28 | 0.06  | 0.07  | -0.03 | 1 | 1 | -1 | 0 | 0  | 0 | 1 | 0 | 0 | 1 | 0 | 0 |
| 227062_at    | Neat1         | non-protein coding RNA 84                                          | -1.00 | -0.55 | -0.74 | -0.63 | 1 | 1 | -1 | 0 | 0  | 0 | 0 | 0 | 0 | 1 | 0 | 1 |
| 228824_s_at  | PTGR1         | prostaglandin reductase 1                                          | -1.83 | -1.72 | -2.02 | -1.81 | 1 | 1 | 0  | 0 | -1 | 0 | 0 | 0 | 1 | 0 | 0 | 0 |
| 235003_at    | UHMK1         | U2AF homology motif (UHM) kinase 1                                 | -0.64 | -0.23 | -0.06 | -0.32 | 1 | 1 | -1 | 0 | 0  | 0 | 1 | 0 | 0 | 1 | 0 | 1 |
| 235567_at    | RORA          | RAR-related orphan receptor A                                      | -0.47 | -0.10 | -0.16 | -0.19 | 1 | 1 | -1 | 0 | 0  | 0 | 1 | 0 | 0 | 1 | 0 | 1 |
| 236417_at    | mfn1          | mitofusin 1                                                        | -0.07 | 0.21  | 0.17  | -0.12 | 1 | 1 | -1 | 0 | 0  | 0 | 0 | 0 | 0 | 1 | 0 | 0 |
| 242924_at    | PITPNB        | phosphatidylinositol transfer protein, beta                        | -0.88 | -0.36 | -0.57 | -0.45 | 1 | 1 | -1 | 0 | 0  | 0 | 1 | 0 | 0 | 1 | 0 | 1 |
| 244153_at    | ZNF207        | zinc finger protein 207                                            | -0.36 | -0.01 | -0.18 | -0.10 | 1 | 1 | -1 | 0 | 0  | 0 | 0 | 0 | 0 | 1 | 0 | 0 |
| 244396_at    | G3BP1         | GTPase activating protein (SH3 domain) binding protein 1           | -0.19 | 0.14  | 0.10  | 0.05  | 1 | 1 | -1 | 0 | 0  | 0 | 1 | 0 | 0 | 1 | 0 | 0 |
| 1557910_at   | HSP90AB1      | heat shock protein 90kDa alpha (cytosolic), class B member 1       | -0.61 | -0.37 | -0.07 | -0.46 | 0 | 1 | 0  | 0 | 0  | 1 | 0 | 0 | 0 | 0 | 1 | 0 |
| 209616_s_at  | CES1          | carboxylesterase 1                                                 | -1.50 | -1.61 | -1.91 | -1.69 | 1 | 1 | 0  | 0 | -1 | 0 | 1 | 0 | 1 | 0 | 0 | 0 |
| 229413_s_at  | Pcgf3         | polycomb group ring finger 3                                       | -0.33 | -0.03 | -0.08 | -0.11 | 1 | 1 | -1 | 0 | 0  | 0 | 0 | 0 | 0 | 1 | 0 | 0 |
| 230607_at    | DENND4A       | DENN/MADD domain containing 4A                                     | -0.05 | 0.40  | 0.36  | 0.33  | 1 | 1 | -1 | 0 | 0  | 0 | 1 | 0 | 0 | 1 | 0 | 1 |
| 232386_at    | VPS13C        | vacuolar protein sorting 13 homolog C (S. cerevisiae)              | -0.24 | 0.01  | 0.04  | -0.07 | 0 | 1 | -1 | 0 | 0  | 0 | 1 | 0 | 0 | 0 | 0 | 0 |
| 235740_at    | MCTP1         | multiple C2 domains, transmembrane 1                               | -0.36 | -0.30 | -0.57 | -0.38 | 1 | 1 | 0  | 0 | -1 | 0 | 0 | 0 | 1 | 0 | 0 | 0 |
| 237741_at    | SLC25A36      | Solute carrier family 25, member 36                                | 0.06  | 0.39  | 0.45  | 0.30  | 1 | 1 | -1 | 0 | 0  | 0 | 1 | 0 | 0 | 1 | 0 | 0 |
| 240062_at    | FAM3C         | family with sequence similarity 3, member C                        | -0.04 | 0.25  | 0.16  | 0.17  | 1 | 1 | -1 | 0 | 0  | 0 | 0 | 0 | 0 | 1 | 0 | 0 |
| 242975_s_at  | Gnas          | GNAS complex locus                                                 | -0.26 | 0.14  | 0.18  | 0.06  | 1 | 1 | -1 | 0 | 0  | 0 | 1 | 0 | 0 | 1 | 0 | 1 |
| 244737_at    | KIAA1429      | KIAA1429                                                           | -0.24 | 0.07  | -0.01 | -0.01 | 1 | 1 | -1 | 0 | 0  | 0 | 0 | 0 | 0 | 1 | 0 | 0 |
| 201879_at    | ARIH1         | ariadne homolog, ubiquitin-conjugating enzyme E2 binding protein   | -0.53 | -0.18 | -0.27 | -0.25 | 1 | 1 | -1 | 0 | 0  | 0 | 1 | 0 | 0 | 1 | 0 | 1 |
| 211751_at    | LOC653513 /// | LOC653513 /// phosphodiesterase 4D interacting                     | -0.33 | -0.32 | -0.08 | -0.39 | 0 | 1 | 0  | 0 | 1  | 0 | 0 | 0 | 0 | 0 | 1 | 0 |
| 212451_at    | SECISBP2L     | SECIS binding protein 2-like                                       | -0.31 | 0.01  | 0.09  | -0.06 | 1 | 1 | -1 | 0 | 0  | 0 | 1 | 0 | 0 | 1 | 0 | 0 |
| 214034_at    | ERAP1         | endoplasmic reticulum aminopeptidase 1                             | 0.22  | 0.31  | 0.56  | 0.24  | 0 | 1 | 0  | 0 | 1  | 0 | 1 | 0 | 0 | 0 | 1 | 0 |
| 220983_s_at  | SPRY4         | sprouty homolog 4 (Drosophila)                                     | -0.55 | -0.26 | -0.34 | -0.33 | 1 | 1 | -1 | 0 | 0  | 0 | 0 | 0 | 0 | 1 | 0 | 0 |
| 223701_s_at  | USP47         | ubiquitin specific peptidase 47                                    | -0.36 | -0.11 | -0.03 | -0.18 | 0 | 1 | -1 | 0 | 0  | 0 | 1 | 0 | 0 | 0 | 0 | 0 |
| 225800_at    | JAZF1         | JAZF zinc finger 1                                                 | -0.08 | 0.21  | 0.24  | 0.13  | 1 | 1 | -1 | 0 | 0  | 0 | 1 | 0 | 0 | 1 | 0 | 0 |
| 240941_at    | ITSN2         | Intersectin 2                                                      | -0.38 | -0.07 | -0.06 | -0.14 | 1 | 1 | -1 | 0 | 0  | 0 | 1 | 0 | 0 | 1 | 0 | 0 |
| 244733_at    | usp33         | ubiquitin specific peptidase 33                                    | -0.19 | 0.15  | 0.08  | 0.07  | 1 | 1 | -1 | 0 | 0  | 0 | 1 | 0 | 0 | 1 | 0 | 0 |
| 214843_s_at  | USP33         | ubiquitin specific peptidase 33                                    | -0.15 | 0.20  | 0.13  | 0.14  | 1 | 1 | -1 | 0 | 0  | 0 | 1 | 0 | 0 | 1 | 0 | 1 |
| 215434_x_at  | LOC10028814   | neuroblastoma breakpoint family member /// neuroblastoma           | -0.23 | -0.06 | 0.12  | -0.11 | 0 | 1 | 0  | 0 | 1  | 0 | 1 | 0 | 0 | 0 | 0 | 0 |
| 216595_at    | FAM186A       | family with sequence similarity 186, member A                      | 0.52  | 0.47  | 0.70  | 0.41  | 0 | 1 | 0  | 0 | 1  | 0 | 0 | 0 | 0 | 0 | 1 | 0 |
| 218166_s_at  | RSF1          | remodeling and spacing factor 1                                    | -0.41 | -0.03 | -0.21 | -0.09 | 1 | 1 | -1 | 0 | 0  | 0 | 0 | 0 | 0 | 1 | 0 | 1 |
| 222313_at    | CNOT2         | CCR4-NOT transcription complex, subunit 2                          | -0.05 | 0.25  | 0.19  | 0.18  | 1 | 1 | -1 | 0 | 0  | 0 | 0 | 0 | 0 | 1 | 0 | 0 |
| 223465_at    | COL4A3BP      | collagen, type IV, alpha 3 (Goodpasture antigen) binding prote     | -0.82 | -0.46 | -0.57 | -0.51 | 1 | 1 | -1 | 0 | 0  | 0 | 0 | 0 | 0 | 1 | 0 | 1 |
| 224012_at    | ANKRD20A1 //  | ankyrin repeat domain 20 family, member A1 /// ankyrin repea       | 0.78  | 0.55  | 0.95  | 0.49  | 1 | 1 | 0  | 0 | 1  | 0 | 0 | 0 | 1 | 0 | 1 | 1 |
| 227740_at    | UHMK1         | U2AF homology motif (UHM) kinase 1                                 | -0.56 | -0.18 | -0.05 | -0.24 | 1 | 1 | -1 | 0 | 0  | 0 | 1 | 0 | 0 | 1 | 0 | 1 |
| 229881_at    | KLF12         | Kruppel-like factor 12                                             | 0.02  | 0.32  | 0.36  | 0.26  | 1 | 1 | -1 | 0 | 0  | 0 | 1 | 0 | 0 | 1 | 0 | 0 |
| 234306_s_at  | SLAMF7        | SLAM family member 7                                               | 0.13  | 0.50  | 0.51  | 0.44  | 1 | 1 | -1 | 0 | 0  | 0 | 1 | 0 | 0 | 1 | 0 | 1 |
| 235537_at    | OCIAD1        | OCIA domain containing 1                                           | -0.12 | 0.18  | 0.33  | 0.12  | 1 | 1 | -1 | 0 | 0  | 0 | 1 | 0 | 0 | 1 | 0 | 0 |
| 235574_at    | GBP4          | guanylate binding protein 4                                        | -0.12 | 0.17  | 0.19  | 0.11  | 1 | 1 | -1 | 0 | 0  | 0 | 1 | 0 | 0 | 1 | 0 | 0 |
| 202118_s_at  | CPNE3         | copine III                                                         | -0.22 | 0.23  | 0.17  | 0.18  | 1 | 1 | -1 | 0 | 0  | 0 | 1 | 0 | 0 | 1 | 0 | 1 |
| 212650_at    | EHBP1         | EH domain binding protein 1                                        | -0.15 | 0.19  | 0.17  | 0.14  | 1 | 1 | -1 | 0 | 0  | 0 | 1 | 0 | 0 | 1 | 0 | 1 |
| 213457_at    | MFHAS1        | malignant fibrous histiocytoma amplified sequence 1                | -0.50 | -0.21 | -0.31 | -0.26 | 1 | 1 | -1 | 0 | 0  | 0 | 0 | 0 | 0 | 1 | 0 | 0 |
| 214615_at    | P2RY10        | purinergic receptor P2Y, G-protein coupled, 10                     | -0.35 | -0.08 | -0.11 | -0.13 | 1 | 1 | -1 | 0 | 0  | 0 | 0 | 0 | 0 | 1 | 0 | 0 |
| 223079_s_at  | GLS           | glutaminase                                                        | -0.55 | -0.22 | -0.26 | -0.26 | 1 | 1 | -1 | 0 | 0  | 0 | 1 | 0 | 0 | 1 | 0 | 1 |
| 226367_at    | KDM5A         | lysine (K)-specific demethylase 5A                                 | -0.35 | -0.02 | -0.16 | -0.07 | 1 | 1 | -1 | 0 | 0  | 0 | 0 | 0 | 0 | 1 | 0 | 1 |
| 231597_x_at  | ---           | ---                                                                | 0.67  | 0.37  | 0.91  | 0.32  | 1 | 1 | 0  | 0 | 1  | 0 | 0 | 0 | 1 | 0 | 1 | 1 |
| 231934_at    | TRIM14        | tripartite motif-containing 14                                     | -0.28 | -0.02 | -0.10 | -0.07 | 1 | 1 | -1 | 0 | 0  | 0 | 0 | 0 | 0 | 1 | 0 | 0 |
| 233387_s_at  | PCNT          | pericentrin                                                        | -0.26 | -0.08 | 0.14  | -0.13 | 0 | 1 | 0  | 0 | 1  | 0 | 1 | 0 | 0 | 0 | 1 | 0 |
| 240951_at    | RORA          | RAR-related orphan receptor A                                      | -0.36 | -0.13 | -0.09 | -0.18 | 0 | 1 | -1 | 0 | 0  | 0 | 1 | 0 | 0 | 0 | 0 | 0 |
| 243940_at    | TSHZ2         | teashirt zinc finger homeobox 2                                    | -0.34 | -0.02 | -0.13 | -0.07 | 1 | 1 | -1 | 0 | 0  | 0 | 0 | 0 | 0 | 1 | 0 | 1 |
| 244171_at    | MKLN1         | muskelin 1, intracellular mediator containing kelch motifs         | -0.66 | -0.36 | -0.43 | -0.41 | 1 | 1 | -1 | 0 | 0  | 0 | 0 | 0 | 0 | 1 | 0 | 0 |
| 244669_at    | SNHG5 /// SN  | small nucleolar RNA host gene 5 (non-protein coding) /// small     | -0.02 | 0.40  | 0.48  | 0.35  | 1 | 1 | -1 | 0 | 0  | 0 | 1 | 0 | 0 | 1 | 0 | 1 |
| 1558678_s_at | MALAT1        | metastasis associated lung adenocarcinoma transcript 1 (non-p      | -0.19 | -0.13 | 0.12  | -0.17 | 0 | 1 | 0  | 0 | 1  | 0 | 1 | 0 | 0 | 0 | 1 | 0 |
| 1560144_at   | ---           | ---                                                                | 1.07  | 0.74  | 1.42  | 0.70  | 1 | 1 | 0  | 0 | 1  | 0 | 0 | 0 | 1 | 0 | 1 | 1 |
| 1569830_at   | PTPRC         | protein tyrosine phosphatase, receptor type, C                     | -0.48 | -0.20 | -0.12 | -0.24 | 1 | 1 | -1 | 0 | 0  | 0 | 1 | 0 | 0 | 1 | 0 | 0 |
| 201711_x_at  | RANBP2        | RAN binding protein 2                                              | 0.02  | 0.04  | 0.27  | 0.00  | 0 | 1 | 0  | 0 | 1  | 0 | 0 | 0 | 0 | 0 | 1 | 0 |
| 202412_s_at  | USP1          | ubiquitin specific peptidase 1                                     | 0.23  | 0.27  | 0.51  | 0.23  | 0 | 1 | 0  | 0 | 1  | 0 | 1 | 0 | 0 | 0 | 1 | 0 |
| 208664_s_at  | TTC3          | tetratricopeptide repeat domain 3                                  | -0.36 | 0.00  | 0.09  | -0.04 | 1 | 1 | -1 | 0 | 0  | 0 | 1 | 0 | 0 | 1 | 0 | 1 |
| 211821_x_at  | GYP A         | glycophorin A (MNS blood group)                                    | 0.43  | 0.33  | 0.60  | 0.28  | 1 | 1 | 0  | 0 | 1  | 0 | 0 | 0 | 1 | 0 | 1 | 0 |
| 220946_s_at  | SETD2         | SET domain containing 2                                            | -0.45 | 0.01  | 0.07  | -0.03 | 1 | 1 | -1 | 0 | 0  | 0 | 1 | 0 | 0 | 1 | 0 | 1 |
| 222600_s_at  | UBA6          | ubiquitin-like modifier activating enzyme 6                        | -0.45 | -0.14 | -0.20 | -0.18 | 1 | 1 | -1 | 0 | 0  | 0 | 0 | 0 | 0 | 1 | 0 | 1 |
| 236728_at    | LNPEP         | leucyl/cystinyl aminopeptidase                                     | -0.16 | 0.10  | 0.21  | 0.06  | 1 | 1 | -1 | 0 | 0  | 0 | 1 | 0 | 0 | 1 | 0 | 0 |
| 237502_at    | CRLS1         | cardiolipin synthase 1                                             | -0.46 | -0.07 | -0.14 | -0.12 | 1 | 1 | -1 | 0 | 0  | 0 | 1 | 0 | 0 | 1 | 0 | 1 |
| 239674_at    | ARID1B        | AT rich interactive domain 1B (SWI1-like)                          | -0.33 | -0.06 | -0.15 | -0.10 | 1 | 1 | -1 | 0 | 0  | 0 | 0 | 0 | 0 | 1 | 0 | 0 |
| 241403_at    | CLK4          | CDC-like kinase 4                                                  | -0.52 | -0.13 | -0.01 | -0.17 | 1 | 1 | -1 | 0 | 0  | 0 | 1 | 0 | 0 | 1 | 0 | 1 |
| 241620_at    | SMCHD1        | structural maintenance of chromosomes flexible hinge domain        | -0.22 | 0.06  | 0.17  | 0.03  | 1 | 1 | -1 | 0 | 0  | 0 | 1 | 0 | 0 | 1 | 0 | 0 |
| 1558702_at   | TEX10         | testis expressed 10                                                | -0.38 | -0.16 | -0.05 | -0.19 | 0 | 1 | -1 | 0 | 0  | 1 | 0 | 0 | 0 | 0 | 0 | 0 |
| 1569791_at   | STK4          | serine/threonine kinase 4                                          | -0.36 | -0.05 | -0.06 | -0.08 | 1 | 1 | -1 | 0 | 0  | 0 | 1 | 0 | 0 | 1 | 0 | 1 |
| 1570371_a_at | EPT1          | Ethanolaminephosphotransferase 1 (CDP-ethanolamine-specifi         | -0.15 | -0.04 | 0.17  | -0.06 | 0 | 1 | 0  | 0 | 1  | 0 | 1 | 0 | 0 | 0 | 0 | 0 |
| 201635_s_at  | FXR1          | fragile X mental retardation, autosomal homolog 1                  | -0.55 | -0.14 | -0.07 | -0.17 | 1 | 1 | -1 | 0 | 0  | 0 | 1 | 0 | 0 | 1 | 0 | 1 |
| 209060_x_at  | NCOA3         | nuclear receptor coactivator 3                                     | -0.26 | -0.04 | 0.04  | -0.07 | 0 | 1 | -1 | 0 | 0  | 0 | 1 | 0 | 0 | 0 | 0 | 0 |
| 210693_at    | SPPL2B        | signal peptide peptidase-like 2B                                   | -0.04 | 0.22  | 0.24  | 0.18  | 0 | 1 | -1 | 0 | 0  | 0 | 1 | 0 | 0 | 0 | 0 | 0 |
| 212758_s_at  | ZEB1          | zinc finger E-box binding homeobox 1                               | -0.14 | 0.00  | 0.17  | -0.03 | 0 | 1 | 0  | 0 | 1  | 0 | 1 | 0 | 0 | 0 | 0 | 0 |
| 222343_at    | BCL2L11       | BCL2-like 11 (apoptosis facilitator)                               | -0.12 | 0.11  | 0.21  | 0.08  | 0 | 1 | -1 | 0 | 0  | 0 | 1 | 0 | 0 | 0 | 0 | 0 |
| 226404_at    | RBM39         | RNA binding motif protein 39                                       | -0.14 | 0.19  | 0.13  | 0.16  | 1 | 1 | -1 | 0 | 0  | 0 | 1 | 0 | 0 | 1 | 0 | 1 |
| 239504_at    | LOC731605 /// | similar to Bcl-2-associated transcription factor 1 (Btf); BCL2-ass | -0.35 | -0.01 | 0.02  | -0.04 | 1 | 1 | -1 | 0 | 0  | 0 | 1 | 0 | 0 | 1 | 0 | 1 |
| 240401_at    | AATF          | apoptosis antagonizing transcription factor                        | -0.10 | 0.19  | 0.13  | 0.16  | 1 | 1 | -1 | 0 | 0  | 0 | 0 | 0 | 0 | 1 | 0 | 0 |
| 243473_at    | SIK3          | serine/threonine-protein kinase QSK                                | -0.62 | -0.27 | -0.37 | -0.30 | 1 | 1 | -1 | 0 | 0  | 0 | 0 | 0 | 0 | 1 | 0 | 1 |
| 244055_at    | RYR3          | ryanodine receptor 3                                               | -0.31 | 0.01  | -0.10 | -0.01 | 1 | 1 | -1 | 0 | 0  | 0 | 0 | 0 | 0 | 1 | 0 | 1 |
| 208965_s_at  | IFI16         | interferon, gamma-inducible protein 16                             | 0.01  | 0.23  | 0.37  | 0.21  | 0 | 1 | -1 | 0 | 0  | 0 | 1 | 0 | 0 | 0 | 0 | 0 |
| 209715_at    | CBX5          | chromobox homolog 5                                                | -0.39 | -0.13 | -0.11 | -0.15 | 0 | 1 | -1 | 0 | 0  | 0 | 1 | 0 | 0 | 0 | 0 | 0 |
| 209750_at    | NR1D2         | nuclear receptor subfamily 1, group D, member 2                    |       |       |       |       |   |   |    |   |    |   |   |   |   |   |   |   |



|              |           |                                                                        |       |       |       |       |   |   |    |   |    |   |   |   |   |   |   |   |
|--------------|-----------|------------------------------------------------------------------------|-------|-------|-------|-------|---|---|----|---|----|---|---|---|---|---|---|---|
| 206500_s_at  | C14orf106 | chromosome 14 open reading frame 106                                   | -0.24 | 0.05  | 0.16  | 0.05  | 1 | 1 | -1 | 0 | 0  | 0 | 1 | 0 | 0 | 1 | 0 | 1 |
| 206668_s_at  | SCAMP1    | secretory carrier membrane protein 1                                   | -0.50 | -0.22 | -0.05 | -0.22 | 1 | 1 | -1 | 0 | 1  | 0 | 1 | 0 | 0 | 1 | 0 | 1 |
| 209446_s_at  | C7orf44   | chromosome 7 open reading frame 44                                     | -1.10 | -0.99 | -1.28 | -0.99 | 1 | 1 | 0  | 0 | -1 | 0 | 0 | 0 | 1 | 0 | 1 | 0 |
| 210800_at    | TIMM8A    | translocase of inner mitochondrial membrane 8 homolog A (yeast)        | 0.57  | 0.50  | 0.80  | 0.50  | 1 | 1 | 0  | 0 | 1  | 0 | 0 | 0 | 1 | 0 | 1 | 0 |
| 214251_s_at  | NUMA1     | nuclear mitotic apparatus protein 1                                    | -0.51 | -0.19 | -0.18 | -0.19 | 1 | 1 | -1 | 0 | 0  | 0 | 1 | 0 | 0 | 1 | 0 | 1 |
| 215342_s_at  | RABGAP1L  | RAB GTPase activating protein 1-like                                   | -0.13 | 0.07  | 0.25  | 0.07  | 0 | 1 | -1 | 0 | 1  | 0 | 1 | 0 | 0 | 0 | 0 | 0 |
| 221765_at    | UGCG      | UDP-glucose ceramide glucosyltransferase                               | -0.76 | -0.33 | -0.31 | -0.33 | 1 | 1 | -1 | 0 | 0  | 0 | 1 | 0 | 0 | 1 | 0 | 1 |
| 223263_s_at  | FGFR10P2  | FGFR1 oncogene partner 2                                               | -0.44 | -0.09 | -0.15 | -0.09 | 1 | 1 | -1 | 0 | 0  | 0 | 1 | 0 | 0 | 1 | 0 | 1 |
| 230106_at    | ZXDC      | ZXD family zinc finger C                                               | -0.11 | 0.02  | 0.20  | 0.02  | 0 | 1 | 0  | 0 | 1  | 0 | 1 | 0 | 0 | 0 | 0 | 0 |
| 230434_at    | PHOSPHO2  | phosphatase, orphan 2                                                  | -0.21 | 0.05  | 0.09  | 0.05  | 0 | 1 | -1 | 0 | 0  | 0 | 1 | 0 | 0 | 0 | 0 | 0 |
| 230820_at    | SMURF2    | SMAD specific E3 ubiquitin protein ligase 2                            | -0.35 | 0.00  | -0.11 | 0.00  | 1 | 1 | -1 | 0 | 0  | 0 | 0 | 0 | 0 | 1 | 0 | 1 |
| 232257_s_at  | C3orf20   | chromosome 3 open reading frame 20                                     | -1.04 | -0.54 | -0.76 | -0.53 | 1 | 1 | -1 | 0 | 0  | 0 | 1 | 0 | 0 | 1 | 0 | 1 |
| 233283_at    | Fntb      | farnesyltransferase, CAAX box, beta                                    | -0.20 | 0.13  | 0.06  | 0.13  | 1 | 1 | -1 | 0 | 0  | 0 | 0 | 0 | 0 | 1 | 0 | 1 |
| 242496_at    | ---       | ---                                                                    | 0.39  | 0.32  | 0.61  | 0.32  | 1 | 1 | 0  | 0 | 1  | 0 | 0 | 0 | 1 | 0 | 1 | 0 |
| 243182_at    | ---       | ---                                                                    | -0.61 | -0.34 | -0.40 | -0.34 | 1 | 1 | -1 | 0 | 0  | 0 | 0 | 0 | 0 | 1 | 0 | 1 |
| 205809_s_at  | WASL      | Wiskott-Aldrich syndrome-like                                          | -0.72 | -0.36 | -0.43 | -0.35 | 1 | 1 | -1 | 0 | 0  | 0 | 1 | 0 | 0 | 1 | 0 | 1 |
| 206548_at    | ---       | ---                                                                    | -1.13 | -1.16 | -1.42 | -1.15 | 0 | 1 | 0  | 0 | -1 | 0 | 0 | 0 | 0 | 0 | 1 | 0 |
| 207549_x_at  | CD46      | CD46 molecule, complement regulatory protein                           | -0.05 | 0.14  | 0.23  | 0.14  | 0 | 1 | -1 | 0 | 0  | 0 | 1 | 0 | 0 | 0 | 0 | 0 |
| 213566_at    | RNASE6    | ribonuclease, RNase A family, k6                                       | -1.82 | -2.09 | -1.99 | -2.08 | 0 | 1 | 1  | 0 | 0  | 0 | 0 | 0 | 0 | 0 | 0 | 1 |
| 224549_x_at  | SND1      | staphylococcal nuclease and tudor domain containing 1                  | 0.64  | 0.45  | 0.87  | 0.46  | 1 | 1 | 0  | 0 | 1  | 0 | 0 | 0 | 1 | 0 | 1 | 0 |
| 237184_at    | ATXN2     | ataxin 2                                                               | -0.59 | -0.27 | -0.26 | -0.26 | 1 | 1 | -1 | 0 | 0  | 0 | 1 | 0 | 0 | 1 | 0 | 1 |
| 238706_at    | PAPD4     | PAP associated domain containing 4                                     | -0.31 | 0.04  | -0.08 | 0.05  | 1 | 1 | -1 | 0 | 0  | 0 | 0 | 0 | 0 | 1 | 0 | 1 |
| 243739_at    | RANBP9    | RAN binding protein 9                                                  | -0.59 | -0.17 | -0.18 | -0.16 | 1 | 1 | -1 | 0 | 0  | 0 | 1 | 0 | 0 | 1 | 0 | 1 |
| 1555812_a_at | ARHGDI8   | Rho GDP dissociation inhibitor (GDI) beta                              | 0.39  | 0.22  | 0.64  | 0.24  | 1 | 1 | 0  | 0 | 1  | 0 | 0 | 0 | 1 | 0 | 1 | 0 |
| 1557236_at   | APOL6     | apolipoprotein L, 6                                                    | -0.25 | 0.03  | -0.04 | 0.05  | 1 | 1 | -1 | 0 | 0  | 0 | 0 | 0 | 0 | 1 | 0 | 1 |
| 201083_s_at  | BCLAF1    | BCL2-associated transcription factor 1                                 | -0.36 | -0.01 | -0.04 | 0.01  | 1 | 1 | -1 | 0 | 0  | 0 | 1 | 0 | 0 | 1 | 0 | 1 |
| 213875_x_at  | C6orf62   | chromosome 6 open reading frame 62                                     | -0.87 | -0.64 | -0.51 | -0.62 | 0 | 1 | -1 | 0 | 0  | 0 | 1 | 0 | 0 | 0 | 0 | 0 |
| 217644_s_at  | SOS2      | son of sevenless homolog 2 (Drosophila)                                | -0.97 | -0.64 | -0.49 | -0.62 | 1 | 1 | -1 | 0 | 0  | 0 | 1 | 0 | 0 | 1 | 0 | 1 |
| 225046_at    | LOC389831 | hypothetical LOC389831                                                 | 0.27  | 0.20  | 0.53  | 0.22  | 1 | 1 | 0  | 0 | 1  | 0 | 0 | 0 | 1 | 0 | 1 | 0 |
| 230466_s_at  | ---       | ---                                                                    | -0.30 | 0.04  | -0.11 | 0.07  | 1 | 1 | -1 | 0 | 0  | 0 | 0 | 0 | 0 | 1 | 0 | 1 |
| 237784_at    | SUB1      | SUB1 homolog (S. cerevisiae)                                           | -1.05 | -0.49 | -0.68 | -0.47 | 1 | 1 | -1 | 0 | 0  | 0 | 0 | 0 | 0 | 1 | 0 | 1 |
| 239351_at    | FKBP3     | FK506 binding protein 3, 25kDa                                         | -0.45 | -0.15 | -0.20 | -0.14 | 1 | 1 | -1 | 0 | 0  | 0 | 0 | 0 | 0 | 1 | 0 | 1 |
| 241091_at    | ---       | ---                                                                    | -0.63 | -0.35 | -0.36 | -0.32 | 1 | 1 | -1 | 0 | 0  | 0 | 1 | 0 | 0 | 1 | 0 | 1 |
| 201446_s_at  | TIA1      | TIA1 cytotoxic granule-associated RNA binding protein                  | -0.32 | -0.07 | -0.02 | -0.04 | 0 | 1 | -1 | 0 | 0  | 0 | 1 | 0 | 0 | 0 | 0 | 1 |
| 205596_s_at  | SMURF2    | SMAD specific E3 ubiquitin protein ligase 2                            | -0.19 | 0.10  | -0.01 | 0.13  | 1 | 1 | -1 | 0 | 0  | 0 | 0 | 0 | 0 | 1 | 0 | 1 |
| 206928_at    | ZNF124    | zinc finger protein 124                                                | -0.36 | -0.10 | 0.00  | -0.07 | 0 | 1 | -1 | 0 | 0  | 0 | 1 | 0 | 0 | 0 | 0 | 1 |
| 218748_s_at  | EXOC5     | exocyst complex component 5                                            | -0.94 | -0.67 | -0.63 | -0.64 | 1 | 1 | -1 | 0 | 0  | 0 | 1 | 0 | 0 | 1 | 0 | 1 |
| 232472_at    | FNDC3B    | fibronectin type III domain containing 3B                              | -1.53 | -1.57 | -1.84 | -1.54 | 0 | 1 | 0  | 0 | -1 | 0 | 0 | 0 | 0 | 1 | 0 | 1 |
| 238356_at    | DOCK11    | dedicator of cytokinesis 11                                            | -0.48 | -0.14 | -0.19 | -0.11 | 1 | 1 | -1 | 0 | 0  | 0 | 1 | 0 | 0 | 1 | 0 | 1 |
| 242588_at    | ---       | ---                                                                    | -0.33 | -0.02 | -0.04 | 0.02  | 1 | 1 | -1 | 0 | 0  | 0 | 1 | 0 | 0 | 1 | 0 | 1 |
| 1557227_s_at | TPR       | translocated promoter region (to activated MET oncogene)               | -0.42 | -0.15 | 0.25  | -0.11 | 0 | 1 | -1 | 0 | 1  | 0 | 1 | 0 | 0 | 0 | 1 | 1 |
| 206667_s_at  | SCAMP1    | secretory carrier membrane protein 1                                   | -0.60 | -0.41 | -0.24 | -0.37 | 0 | 1 | -1 | 0 | 0  | 1 | 0 | 0 | 0 | 0 | 0 | 0 |
| 212417_at    | SCAMP1    | secretory carrier membrane protein 1                                   | -0.50 | -0.28 | -0.20 | -0.23 | 0 | 1 | -1 | 0 | 0  | 0 | 1 | 0 | 0 | 0 | 0 | 1 |
| 214786_at    | MAP3K1    | mitogen-activated protein kinase kinase kinase 1                       | -0.73 | -0.22 | -0.15 | -0.19 | 1 | 1 | -1 | 0 | 0  | 0 | 1 | 0 | 0 | 1 | 0 | 1 |
| 223890_at    | PRO1082   | hypothetical protein PRO1082                                           | -0.14 | 0.16  | 0.09  | 0.20  | 1 | 1 | -1 | 0 | 0  | 0 | 0 | 0 | 1 | 0 | 1 | 0 |
| 227510_x_at  | MALAT1    | metastasis associated lung adenocarcinoma transcript 1 (non-coding)    | 0.32  | 0.19  | 0.64  | 0.23  | 1 | 1 | 0  | 0 | 1  | 0 | 1 | 0 | 1 | 0 | 1 | 0 |
| 1556226_at   | PDS5A     | PDS5, regulator of cohesion maintenance, homolog A (S. cerevisiae)     | -0.52 | -0.16 | -0.24 | -0.11 | 1 | 1 | -1 | 0 | 0  | 0 | 1 | 0 | 0 | 1 | 0 | 1 |
| 201450_s_at  | TIA1      | TIA1 cytotoxic granule-associated RNA binding protein                  | -0.22 | 0.03  | -0.01 | 0.08  | 0 | 1 | -1 | 0 | 0  | 0 | 0 | 0 | 0 | 0 | 0 | 1 |
| 210807_s_at  | SLC16A7   | solute carrier family 16, member 7 (monocarboxylic acid transporter)   | -0.30 | -0.07 | -0.04 | -0.02 | 0 | 1 | -1 | 0 | 0  | 0 | 0 | 0 | 0 | 0 | 0 | 1 |
| 222714_s_at  | LACTB2    | lactamase, beta 2                                                      | -0.59 | -0.35 | -0.40 | -0.30 | 0 | 1 | -1 | 0 | 0  | 0 | 0 | 0 | 0 | 0 | 0 | 1 |
| 229399_at    | C10orf118 | chromosome 10 open reading frame 118                                   | -0.27 | -0.08 | 0.23  | -0.03 | 0 | 1 | -1 | 0 | 1  | 0 | 1 | 0 | 0 | 0 | 0 | 0 |
| 235653_s_at  | THAP6     | THAP domain containing 6                                               | -0.52 | -0.24 | -0.10 | -0.20 | 1 | 1 | -1 | 0 | 0  | 0 | 1 | 0 | 0 | 1 | 0 | 1 |
| 239692_at    | ILKAP     | integrin-linked kinase-associated serine/threonine phosphatase         | -0.65 | -0.39 | -0.18 | -0.33 | 0 | 1 | -1 | 0 | 0  | 0 | 1 | 0 | 0 | 0 | 0 | 1 |
| 240105_at    | GCF1      | chromosome 21 open reading frame 66                                    | -0.25 | 0.11  | 0.22  | 0.16  | 1 | 1 | -1 | 0 | 0  | 0 | 1 | 0 | 0 | 1 | 0 | 1 |
| 241532_at    | Rmnd5a    | required for meiotic nuclear division 5 homolog A (S. cerevisiae)      | -0.36 | -0.12 | -0.17 | -0.08 | 0 | 1 | -1 | 0 | 0  | 0 | 0 | 0 | 0 | 0 | 0 | 1 |
| 1557436_at   | XKR6      | XK, Kell blood group complex subunit-related family, member 6          | -0.45 | -0.17 | -0.09 | -0.11 | 1 | 1 | -1 | 0 | 0  | 0 | 1 | 0 | 0 | 1 | 0 | 1 |
| 1565913_at   | ZC3HAV1   | zinc finger CCCH-type, antiviral 1                                     | -0.12 | 0.16  | 0.23  | 0.21  | 1 | 1 | -1 | 0 | 0  | 0 | 1 | 0 | 0 | 1 | 0 | 1 |
| 205885_at    | ITGA4     | integrin, alpha 4 (antigen CD49D, alpha 4 subunit of VLA-4 receptor)   | -0.46 | -0.11 | -0.23 | -0.05 | 1 | 1 | -1 | 0 | 0  | 0 | 0 | 0 | 0 | 1 | 0 | 1 |
| 210717_at    | ube2d2    | ubiquitin-conjugating enzyme E2D 2 (UBC4/5 homolog, yeast)             | -0.43 | -0.09 | -0.09 | -0.03 | 1 | 1 | -1 | 0 | 0  | 0 | 1 | 0 | 0 | 1 | 0 | 1 |
| 220771_at    | LOC51152  | melanoma antigen                                                       | 0.38  | 0.20  | 0.58  | 0.26  | 1 | 1 | 0  | 0 | 1  | 0 | 0 | 0 | 1 | 0 | 1 | 0 |
| 227345_at    | TNFRSF10D | tumor necrosis factor receptor superfamily, member 10d, decoy receptor | -0.97 | -0.93 | -1.17 | -0.87 | 0 | 1 | 0  | 0 | -1 | 0 | 0 | 0 | 0 | 0 | 1 | 0 |
| 242989_at    | ---       | ---                                                                    | -0.33 | -0.09 | -0.15 | -0.03 | 0 | 1 | -1 | 0 | 0  | 0 | 0 | 0 | 0 | 0 | 0 | 1 |
| 243552_at    | MBTD1     | mbt domain containing 1                                                | -0.40 | -0.16 | -0.08 | -0.09 | 0 | 1 | -1 | 0 | 0  | 0 | 1 | 0 | 0 | 0 | 0 | 1 |
| 243959_at    | MKLN1     | muskelin 1, intracellular mediator containing kelch motifs             | -0.69 | -0.36 | -0.30 | -0.31 | 1 | 1 | -1 | 0 | 0  | 0 | 1 | 0 | 0 | 1 | 0 | 1 |
| 201008_s_at  | TXNIP     | thioredoxin interacting protein                                        | -0.27 | -0.24 | 0.01  | -0.18 | 0 | 1 | 0  | 0 | 1  | 0 | 1 | 0 | 0 | 0 | 0 | 0 |
| 223254_s_at  | G2E3      | G2/M-phase specific E3 ubiquitin protein ligase                        | -0.53 | -0.33 | -0.18 | -0.26 | 0 | 1 | -1 | 0 | 0  | 0 | 1 | 0 | 0 | 0 | 0 | 1 |
| 228986_at    | OSBPL8    | oxysterol binding protein-like 8                                       | -0.73 | -0.43 | -0.25 | -0.36 | 0 | 1 | -1 | 0 | 0  | 0 | 1 | 0 | 0 | 0 | 0 | 1 |
| 231370_at    | PPM1A     | Protein phosphatase, Mg2+/Mn2+ dependent, 1A                           | -0.88 | -0.42 | -0.66 | -0.35 | 1 | 1 | -1 | 0 | 0  | 0 | 0 | 0 | 0 | 1 | 1 | 1 |
| 237747_at    | fam107b   | family with sequence similarity 107, member B                          | -0.44 | -0.24 | -0.25 | -0.17 | 0 | 1 | -1 | 0 | 0  | 0 | 0 | 0 | 0 | 0 | 0 | 1 |
| 243631_at    | MPHOSPH8  | M-phase phosphoprotein 8                                               | 0.07  | 0.27  | 0.38  | 0.33  | 0 | 1 | -1 | 0 | 0  | 0 | 1 | 0 | 0 | 0 | 0 | 0 |
| 244263_at    | ---       | ---                                                                    | -0.46 | -0.28 | -0.17 | -0.22 | 0 | 1 | -1 | 0 | 0  | 0 | 1 | 0 | 0 | 0 | 0 | 0 |
| 210218_s_at  | SP100     | SP100 nuclear antigen                                                  | -0.76 | -0.44 | -0.39 | -0.35 | 1 | 1 | -1 | 0 | 0  | 0 | 1 | 0 | 0 | 1 | 0 | 1 |
| 232125_at    | ---       | ---                                                                    | -0.44 | -0.13 | 0.01  | -0.05 | 1 | 1 | -1 | 0 | 0  | 0 | 1 | 0 | 0 | 1 | 0 | 1 |
| 232757_at    | mtss1     | metastasis suppressor 1                                                | -0.15 | -0.15 | -0.43 | -0.07 | 0 | 1 | 0  | 0 | -1 | 0 | 0 | 0 | 0 | 0 | 1 | 0 |
| 237376_at    | cul3      | cullin 3                                                               | -0.48 | -0.18 | -0.14 | -0.10 | 1 | 1 | -1 | 0 | 0  | 0 | 0 | 0 | 0 | 1 | 0 | 1 |
| 241889_at    | NFKBID    | nuclear factor of kappa light polypeptide gene enhancer in B-cells     | -0.32 | -0.10 | 0.03  | -0.02 | 0 | 1 | -1 | 0 | 0  | 0 | 1 | 0 | 0 | 0 | 0 | 1 |
| 1556471_at   | SCML4     | sex comb on midleg-like 4 (Drosophila)                                 | 0.10  | 0.28  | 0.29  | 0.37  | 0 | 1 | -1 | 0 | 0  | 0 | 0 | 0 | 0 | 0 | 0 | 1 |
| 1558093_s_at | MATR3     | matrin 3                                                               | -0.52 | -0.42 | -0.11 | -0.33 | 1 | 1 | 0  | 0 | 1  | 0 | 1 | 0 | 1 | 0 | 0 | 0 |
| 210057_at    | SMG1      | SMG1 homolog, phosphatidylinositol 3-kinase-related kinase (C          | -0.77 | -0.46 | -0.42 | -0.37 | 1 | 1 | -1 | 0 | 0  | 0 | 1 | 0 | 0 | 1 | 0 | 1 |
| 217656_at    | SMARCA4   | SWI/SNF related, matrix associated, actin dependent regulator          | -0.14 | 0.04  | 0.07  | 0.13  | 0 | 1 | -1 | 0 | 0  | 0 | 0 | 0 | 0 | 0 | 0 | 1 |
| 240141_at    | papd4     | PAP associated domain containing 4                                     | -0.60 | -0.30 | -0.24 | -0.21 | 1 | 1 | -1 | 0 | 0  | 0 | 1 | 0 | 0 | 1 | 0 | 1 |
| 1562230_at   | ---       | ---                                                                    | -0.30 | -0.11 | -0.10 | -0.01 | 0 | 1 | -1 | 0 | 0  | 0 | 0 | 0 | 0 | 0 | 0 | 1 |
| 1564053_a_at | YTHDF3    | YTH domain family, member 3                                            | -0.91 | -0.70 | -0.74 | -0.60 | 0 | 1 | -1 | 0 | 0  | 0 | 0 | 0 | 0 | 0 | 0 | 1 |
| 206652_at    | ZMYM5     | zinc finger, MYM-type 5                                                | -0.38 | -0.19 | -0.12 | -0.09 | 0 | 1 | -1 |   |    |   |   |   |   |   |   |   |



|              |                |                                                                  |       |       |       |       |   |   |    |    |       |   |   |   |   |   |   |   |
|--------------|----------------|------------------------------------------------------------------|-------|-------|-------|-------|---|---|----|----|-------|---|---|---|---|---|---|---|
| 1553185_at   | RASEF          | RAS and EF-hand domain containing                                | 0.45  | 0.28  | 0.62  | 0.44  | 1 | 1 | 0  | 0  | 1     | 0 | 0 | 0 | 1 | 0 | 0 | 0 |
| 202609_at    | EPS8           | epidermal growth factor receptor pathway substrate 8             | -0.40 | -0.01 | -0.22 | 0.15  | 1 | 1 | -1 | 0  | 0     | 0 | 0 | 0 | 0 | 1 | 0 | 1 |
| 208797_s_at  | GOLGA8A        | golgin A8 family, member A                                       | -0.11 | 0.10  | 0.42  | 0.26  | 1 | 1 | -1 | 0  | 0     | 1 | 0 | 1 | 0 | 0 | 1 |   |
| 1554250_s_at | TRIM73         | tripartite motif-containing 73                                   | -0.10 | 0.01  | -0.08 | 0.18  | 0 | 1 | 0  | 0  | 0     | 1 | 0 | 0 | 0 | 0 | 1 |   |
| 1554770_x_at | ZNF785         | zinc finger protein 785                                          | -0.49 | -0.31 | -0.46 | -0.14 | 0 | 1 | 0  | 0  | 0     | 1 | 0 | 0 | 0 | 0 | 1 |   |
| 204995_at    | CDK5R1         | cyclin-dependent kinase 5, regulatory subunit 1 (p35)            | 0.17  | 0.28  | 0.25  | 0.45  | 0 | 1 | 0  | 0  | 0     | 1 | 0 | 0 | 0 | 0 | 1 |   |
| 210942_s_at  | ST3GAL6        | ST3 beta-galactoside alpha-2,3-sialyltransferase 6               | -1.59 | -1.26 | -1.40 | -1.08 | 0 | 1 | -1 | 0  | 0     | 1 | 0 | 0 | 0 | 0 | 1 |   |
| 216683_at    | tbca           | tubulin folding cofactor A                                       | -0.36 | -0.27 | -0.31 | -0.09 | 0 | 1 | 0  | 0  | 0     | 1 | 0 | 0 | 0 | 0 | 1 |   |
| 217540_at    | FAM55C         | family with sequence similarity 55, member C                     | -0.39 | -0.25 | -0.29 | -0.08 | 0 | 1 | 0  | 0  | 0     | 1 | 0 | 0 | 0 | 0 | 1 |   |
| 221986_s_at  | KLHL24         | kelch-like 24 (Drosophila)                                       | -0.52 | -0.31 | -0.18 | -0.15 | 0 | 1 | -1 | 0  | 0     | 1 | 0 | 0 | 0 | 0 | 1 |   |
| 223578_x_at  | MALAT1         | metastasis associated lung adenocarcinoma transcript 1 (non-p    | 0.76  | 0.46  | 0.96  | 0.63  | 1 | 1 | 0  | -1 | 1     | 0 | 0 | 0 | 1 | 0 | 0 |   |
| 226550_at    | ---            | ---                                                              | -0.66 | -0.54 | -0.59 | -0.36 | 0 | 1 | 0  | 0  | 0     | 1 | 0 | 0 | 0 | 0 | 1 |   |
| 232980_at    | LMBRD1         | LMBRD1 domain containing 1                                       | -0.15 | -0.06 | -0.09 | 0.11  | 0 | 1 | 0  | 0  | 0     | 1 | 0 | 0 | 0 | 0 | 1 |   |
| 1554910_at   | PRKD3          | protein kinase D3                                                | -0.37 | -0.24 | -0.27 | -0.06 | 0 | 1 | 0  | 0  | 0     | 1 | 0 | 0 | 0 | 0 | 1 |   |
| 1559289_at   | TADA1          | Transcriptional adaptor 1                                        | -0.44 | -0.31 | -0.39 | -0.13 | 0 | 1 | 0  | 0  | 0     | 1 | 0 | 0 | 0 | 0 | 1 |   |
| 1564789_at   | ---            | ---                                                              | -0.76 | -0.72 | -0.93 | -0.54 | 0 | 1 | 0  | 0  | -1    | 1 | 0 | 0 | 0 | 1 | 0 |   |
| 1565875_at   | ---            | ---                                                              | -0.13 | 0.01  | -0.14 | 0.19  | 0 | 1 | 0  | 0  | 0     | 1 | 0 | 0 | 0 | 0 | 1 |   |
| 1569431_at   | PAFAH1B2       | platelet-activating factor acetylhydrolase 1b, catalytic subunit | -0.36 | -0.37 | -0.47 | -0.19 | 0 | 1 | 0  | 0  | 0     | 1 | 0 | 0 | 0 | 0 | 1 |   |
| 204956_at    | MTAP           | methylthioadenosine phosphorylase                                | -0.06 | 0.07  | 0.04  | 0.25  | 0 | 1 | 0  | 0  | 0     | 1 | 0 | 0 | 0 | 0 | 1 |   |
| 207907_at    | TNFSF14        | tumor necrosis factor (ligand) superfamily, member 14            | -2.27 | -2.23 | -2.39 | -2.05 | 0 | 1 | 0  | 0  | 0     | 1 | 0 | 0 | 0 | 0 | 1 |   |
| 215188_at    | STK24          | serine/threonine kinase 24                                       | -1.11 | -0.91 | -0.94 | -0.73 | 0 | 1 | -1 | 0  | 0     | 1 | 0 | 0 | 0 | 0 | 1 |   |
| 222473_s_at  | ERBB2IP        | erbB2 interacting protein                                        | -0.32 | -0.22 | -0.27 | -0.04 | 0 | 1 | 0  | 0  | 0     | 1 | 0 | 0 | 0 | 0 | 1 |   |
| 225237_s_at  | MSI2           | musashi homolog 2 (Drosophila)                                   | -0.48 | -0.38 | -0.48 | -0.20 | 0 | 1 | 0  | 0  | 0     | 1 | 0 | 0 | 0 | 0 | 1 |   |
| 227719_at    | SMAD9          | SMAD family member 9                                             | -0.38 | -0.16 | -0.20 | 0.02  | 0 | 1 | -1 | 0  | 0     | 1 | 0 | 0 | 0 | 0 | 1 |   |
| 229732_at    | ZNF823         | zinc finger protein 823                                          | 0.03  | 0.13  | 0.07  | 0.31  | 0 | 1 | 0  | 0  | 0     | 1 | 0 | 0 | 0 | 0 | 1 |   |
| 229966_at    | EWSR1          | Ewing sarcoma breakpoint region 1                                | -0.44 | -0.21 | -0.44 | -0.02 | 0 | 1 | 0  | 0  | 0     | 1 | 0 | 0 | 0 | 0 | 1 |   |
| 231995_at    | C9orf82        | chromosome 9 open reading frame 82                               | -0.28 | -0.14 | -0.22 | 0.05  | 0 | 1 | 0  | 0  | 0     | 1 | 0 | 0 | 0 | 0 | 1 |   |
| 233664_at    | ARL15          | ADP-ribosylation factor-like 15                                  | -0.63 | -0.64 | -0.75 | -0.46 | 0 | 1 | 0  | 0  | 0     | 1 | 0 | 0 | 0 | 0 | 1 |   |
| 235803_at    | CRLF3          | cytokine receptor-like factor 3                                  | -0.51 | -0.43 | -0.52 | -0.25 | 0 | 1 | 0  | 0  | 0     | 1 | 0 | 0 | 0 | 0 | 1 |   |
| 241275_at    | CAPZA1         | Capping protein (actin filament) muscle Z-line, alpha 1          | -0.50 | -0.36 | -0.38 | -0.18 | 0 | 1 | 0  | 0  | 0     | 1 | 0 | 0 | 0 | 0 | 1 |   |
| 244674_at    | RBM6           | RNA binding motif protein 6                                      | -0.73 | -0.51 | -0.67 | -0.33 | 0 | 1 | 0  | 0  | 0     | 1 | 0 | 0 | 0 | 0 | 1 |   |
| 1569129_s_at | C3orf38        | chromosome 3 open reading frame 38                               | -0.21 | -0.14 | -0.24 | 0.05  | 0 | 1 | 0  | 0  | 0     | 1 | 0 | 0 | 0 | 0 | 1 |   |
| 1569472_s_at | TTC3           | tetratricopeptide repeat domain 3                                | -0.26 | -0.09 | 0.32  | 0.10  | 1 | 1 | -1 | 0  | 1     | 0 | 1 | 0 | 1 | 0 | 1 |   |
| 203548_s_at  | LPL            | lipoprotein lipase                                               | -2.69 | -2.72 | -2.92 | -2.53 | 0 | 1 | 0  | 0  | -1    | 0 | 0 | 0 | 0 | 0 | 1 |   |
| 219730_at    | MED18          | mediator complex subunit 18                                      | -1.10 | -0.90 | -1.04 | -0.71 | 0 | 1 | 0  | 0  | 0     | 1 | 0 | 0 | 0 | 0 | 1 |   |
| 228988_at    | ZNF711         | zinc finger protein 711                                          | -0.15 | -0.07 | -0.08 | 0.11  | 0 | 1 | 0  | 0  | 0     | 1 | 0 | 0 | 0 | 0 | 1 |   |
| 235052_at    | ZNF792         | zinc finger protein 792                                          | 0.08  | 0.18  | 0.13  | 0.37  | 0 | 1 | 0  | 0  | 0     | 1 | 0 | 0 | 0 | 0 | 1 |   |
| 236202_at    | ---            | ---                                                              | -0.24 | -0.10 | -0.09 | 0.09  | 0 | 1 | 0  | 0  | 0     | 1 | 0 | 0 | 0 | 0 | 1 |   |
| 239778_x_at  | CAPN7          | calpain 7                                                        | -0.09 | -0.01 | 0.00  | 0.18  | 0 | 1 | 0  | 0  | 0     | 1 | 0 | 0 | 0 | 0 | 1 |   |
| 240265_at    | TRAF3IP3       | TRAF3 interacting protein 3                                      | 0.00  | 0.12  | -0.02 | 0.31  | 0 | 1 | 0  | 0  | 0     | 1 | 0 | 0 | 0 | 0 | 1 |   |
| 241863_x_at  | ttc14          | tetratricopeptide repeat domain 14                               | -0.23 | -0.01 | -0.17 | 0.18  | 0 | 1 | 0  | 0  | 0     | 1 | 0 | 0 | 0 | 0 | 1 |   |
| 242289_at    | ---            | ---                                                              | -0.02 | 0.05  | -0.02 | 0.25  | 0 | 1 | 0  | 0  | 0     | 1 | 0 | 0 | 0 | 0 | 1 |   |
| 243570_at    | SPCS2          | signal peptidase complex subunit 2 homolog (S. cerevisiae)       | -0.61 | -0.52 | -0.55 | -0.33 | 0 | 1 | 0  | 0  | 0     | 1 | 0 | 0 | 0 | 0 | 1 |   |
| 1555116_s_at | SLC11A1        | solute carrier family 11 (proton-coupled divalent metal ion tra  | -2.39 | -2.71 | -2.51 | -2.51 | 1 | 1 | 0  | -1 | 0     | 0 | 0 | 0 | 0 | 1 | 0 |   |
| 1568865_at   | FNTB           | Farnesyltransferase, CAAX box, beta                              | -0.14 | -0.15 | -0.23 | 0.05  | 0 | 1 | 0  | 0  | 0     | 1 | 0 | 0 | 0 | 0 | 1 |   |
| 205684_s_at  | DENND4C        | DENN/MADD domain containing 4C                                   | -0.37 | -0.40 | -0.47 | -0.19 | 0 | 1 | 0  | 0  | 0     | 1 | 0 | 0 | 0 | 0 | 1 |   |
| 220038_at    | C8orf44 /// SG | chromosome 8 open reading frame 44 /// serum/glucocorticoid      | -1.21 | -1.22 | -1.33 | -1.02 | 0 | 1 | 0  | 0  | 0     | 1 | 0 | 0 | 0 | 0 | 1 |   |
| 228654_at    | SPIN4          | spindlin family, member 4                                        | -0.64 | -0.52 | -0.56 | -0.32 | 0 | 1 | 0  | 0  | 0     | 1 | 0 | 0 | 0 | 0 | 1 |   |
| 228905_at    | PCM1           | pericentriolar material 1                                        | -0.01 | 0.09  | 0.07  | 0.29  | 0 | 1 | 0  | 0  | 0     | 1 | 0 | 0 | 0 | 0 | 1 |   |
| 229075_at    | SPATA5         | spermatogenesis associated 5                                     | -0.27 | -0.21 | -0.33 | -0.01 | 0 | 1 | 0  | 0  | -0.27 | 0 | 0 | 0 | 0 | 0 | 1 |   |
| 232648_at    | PSMA3          | proteasome (prosome, macropain) subunit, alpha type, 3           | -0.51 | -0.23 | -0.25 | -0.03 | 1 | 1 | -1 | 0  | 0     | 1 | 0 | 0 | 0 | 1 | 0 |   |
| 235060_at    | LOC100190981   | hypothetical LOC100190986                                        | -0.50 | -0.36 | -0.33 | -0.16 | 0 | 1 | 0  | 0  | 0     | 1 | 0 | 0 | 0 | 0 | 1 |   |
| 240271_at    | mtmr3          | myotubularin related protein 3                                   | -0.66 | -0.58 | -0.61 | -0.39 | 0 | 1 | 0  | 0  | 0     | 1 | 0 | 0 | 0 | 0 | 1 |   |
| 240789_at    | WDR44          | WD repeat domain 44                                              | -0.21 | -0.20 | -0.29 | 0.00  | 0 | 1 | 0  | 0  | 0     | 1 | 0 | 0 | 0 | 0 | 1 |   |
| 244763_at    | MTRF1          | mitochondrial translational release factor 1                     | -0.33 | -0.20 | -0.24 | 0.00  | 0 | 1 | 0  | 0  | 0     | 1 | 0 | 0 | 0 | 0 | 1 |   |
| 1565692_at   | ---            | ---                                                              | -0.26 | -0.18 | -0.20 | 0.03  | 0 | 1 | 0  | 0  | 0     | 1 | 0 | 0 | 0 | 0 | 1 |   |
| 1570115_at   | PP12708        | hypothetical LOC100130609                                        | -0.26 | -0.17 | -0.17 | 0.05  | 0 | 1 | 0  | 0  | 0     | 1 | 0 | 0 | 0 | 0 | 1 |   |
| 214740_at    | POLR2J /// PO  | polymerase (RNA) II (DNA directed) polypeptide J, 13.3kDa ///    | -0.74 | -0.46 | -0.50 | -0.25 | 0 | 1 | -1 | 0  | 0     | 1 | 0 | 0 | 0 | 0 | 1 |   |
| 219858_s_at  | MFSD6          | major facilitator superfamily domain containing 6                | -1.25 | -0.92 | -0.98 | -0.70 | 1 | 1 | -1 | 0  | 0     | 1 | 0 | 0 | 0 | 1 | 1 |   |
| 232614_at    | BCL2           | B-cell CLL/lymphoma 2                                            | -0.12 | -0.09 | -0.19 | 0.12  | 0 | 1 | 0  | 0  | 0     | 1 | 0 | 0 | 0 | 0 | 1 |   |
| 233713_at    | SMYD2          | SET and MYND domain containing 2                                 | 0.06  | 0.17  | 0.14  | 0.38  | 0 | 1 | 0  | 0  | 0     | 1 | 0 | 0 | 0 | 0 | 1 |   |
| 237890_at    | Dtnbp1         | dystrobrevin binding protein 1                                   | -0.14 | 0.11  | 0.09  | 0.32  | 0 | 1 | -1 | 0  | 0     | 1 | 0 | 0 | 0 | 0 | 1 |   |
| 238525_at    | DDX56          | DEAD (Asp-Glu-Ala-Asp) box polypeptide 56                        | -0.23 | -0.25 | -0.31 | -0.05 | 0 | 1 | 0  | 0  | 0     | 1 | 0 | 0 | 0 | 0 | 1 |   |
| 241680_at    | MBD3           | methyl-CpG binding domain protein 3                              | -0.40 | -0.39 | -0.45 | -0.17 | 0 | 1 | 0  | 0  | 0     | 1 | 0 | 0 | 0 | 0 | 1 |   |
| 241755_at    | UQCRC2         | ubiquinol-cytochrome c reductase core protein II                 | -0.96 | -0.84 | -0.88 | -0.63 | 0 | 1 | 0  | 0  | 0     | 1 | 0 | 0 | 0 | 0 | 1 |   |
| 242563_at    | fchsd2         | FCH and double SH3 domains 2                                     | -0.09 | -0.04 | -0.15 | 0.17  | 0 | 1 | 0  | 0  | 0     | 1 | 0 | 0 | 0 | 0 | 1 |   |
| 244766_at    | LOC100271831   | SMG1 homolog, phosphatidylinositol 3-kinase-related kinase p     | -0.34 | -0.27 | -0.25 | -0.06 | 0 | 1 | 0  | 0  | 0     | 1 | 0 | 0 | 0 | 0 | 1 |   |
| 1557538_at   | Med13l         | mediator complex subunit 13-like                                 | -0.50 | -0.48 | -0.54 | -0.26 | 0 | 1 | 0  | 0  | 0     | 1 | 0 | 0 | 0 | 0 | 1 |   |
| 209790_s_at  | CASP6          | caspase 6, apoptosis-related cysteine peptidase                  | -0.02 | 0.05  | -0.02 | 0.27  | 0 | 1 | 0  | 0  | 0     | 1 | 0 | 0 | 0 | 0 | 1 |   |
| 211310_at    | EZH1           | enhancer of zeste homolog 1 (Drosophila)                         | -0.42 | -0.20 | -0.19 | 0.02  | 0 | 1 | -1 | 0  | 0     | 1 | 0 | 0 | 0 | 0 | 1 |   |
| 223771_at    | TMEM87A        | Transmembrane protein 87A                                        | 0.02  | 0.02  | -0.04 | 0.25  | 0 | 1 | 0  | 0  | 0     | 1 | 0 | 0 | 0 | 0 | 1 |   |
| 231109_at    | CELF2          | CUG triplet repeat, RNA binding protein 2                        | -0.26 | -0.06 | -0.04 | 0.16  | 0 | 1 | -1 | 0  | 0     | 1 | 0 | 0 | 0 | 0 | 1 |   |
| 232885_at    | NCRNA00081     | non-protein coding RNA 81                                        | -0.33 | -0.34 | -0.39 | -0.12 | 0 | 1 | 0  | 0  | 0     | 1 | 0 | 0 | 0 | 0 | 1 |   |
| 233400_at    | CCDC82         | coiled-coil domain containing 82                                 | -0.09 | -0.04 | -0.06 | 0.18  | 0 | 1 | 0  | 0  | 0     | 1 | 0 | 0 | 0 | 0 | 1 |   |
| 235469_at    | FAM133B /// L  | family with sequence similarity 133, member B /// family with    | -0.13 | -0.05 | -0.05 | 0.17  | 0 | 1 | 0  | 0  | 0     | 1 | 0 | 0 | 0 | 0 | 1 |   |
| 235611_at    | SREK1          | splicing regulatory glutamine/lysine-rich protein 1              | -0.23 | -0.07 | -0.19 | 0.16  | 0 | 1 | 0  | 0  | 0     | 1 | 0 | 0 | 0 | 0 | 1 |   |
| 235811_at    | Mbn1           | muscleblind-like (Drosophila)                                    | -0.37 | -0.21 | -0.18 | 0.00  | 0 | 1 | 0  | 0  | 0     | 1 | 0 | 0 | 0 | 0 | 1 |   |
| 236558_at    | Mbn1           | muscleblind-like (Drosophila)                                    | -0.28 | -0.18 | -0.16 | 0.05  | 0 | 1 | 0  | 0  | 0     | 1 | 0 | 0 | 0 | 0 | 1 |   |
| 237333_at    | RBBP4          | retinoblastoma binding protein 4                                 | -0.57 | -0.49 | -0.49 | -0.26 | 0 | 1 | 0  | 0  | 0     | 1 | 0 | 0 | 0 | 0 | 1 |   |
| 243537_at    | GIT2           | G protein-coupled receptor kinase interacting ArfGAP 2           | -0.28 | -0.21 | -0.24 | 0.01  | 0 | 1 | 0  | 0  | 0     | 1 | 0 | 0 | 0 | 0 | 1 |   |
| 244473_at    | Atf7           | activating transcription factor 7                                | -0.51 | -0.45 | -0.42 | -0.23 | 0 | 1 | 0  | 0  | 0     | 1 | 0 | 0 | 0 | 0 | 1 |   |
| 1558105_a_at | ---            | ---                                                              | -0.62 | -0.56 | -0.58 | -0.34 | 0 | 1 | 0  | 0  | 0     | 1 | 0 | 0 | 0 | 0 | 1 |   |
| 1559580_at   | LRRC39         | leucine rich repeat containing 39                                | -0.19 | -0.15 | -0.18 | 0.07  | 0 | 1 | 0  | 0  | 0     | 1 | 0 | 0 | 0 | 0 | 1 |   |
| 1559731_x_at | MACROD1        | MACRO domain containing 1                                        | -0.22 | -0.15 | -0.17 | 0.09  | 0 | 1 | 0  | 0  | 0     | 1 | 0 | 0 | 0 | 0 | 1 |   |
| 1559932_at   | ---            | ---                                                              | -0.40 | -0.26 | -0.22 | -0.04 | 0 | 1 | 0  | 0  | 0     | 1 | 0 | 0 | 0 | 0 | 1 |   |
| 1562364_at   | GVIN1          | GTPase, very large interferon inducible 1                        | -0.43 | 0.04  | 0.06  | 0.27  | 1 | 1 | -1 | 0  | 0     | 1 | 1 | 0 | 0 | 1 | 0 |   |
| 1562457_at   | NCKAP5L        | NCK-associated protein 5-like                                    | -0.47 | -0.38 | -0.44 | -0.15 | 0 | 1 | 0  | 0  | 0     | 1 | 0 | 0 |   |   |   |   |



|              |               |                                                                |       |       |       |       |   |   |   |    |    |    |    |    |   |   |   |   |   |
|--------------|---------------|----------------------------------------------------------------|-------|-------|-------|-------|---|---|---|----|----|----|----|----|---|---|---|---|---|
| 214815_at    | TRIM33        | tripartite motif-containing 33                                 | -0.24 | -0.26 | -0.28 | -0.01 | 0 | 1 | 0 | 0  | 0  | 0  | 1  | 0  | 0 | 0 | 0 | 1 | 0 |
| 220467_at    | ---           | ---                                                            | -0.06 | -0.05 | -0.09 | 0.20  | 0 | 1 | 0 | 0  | 0  | 0  | 1  | 0  | 0 | 0 | 0 | 1 | 0 |
| 224151_s_at  | AK3           | adenylate kinase 3                                             | -0.03 | -0.01 | 0.03  | 0.24  | 0 | 1 | 0 | 0  | 0  | 0  | 1  | 0  | 0 | 0 | 0 | 1 | 0 |
| 224568_x_at  | MALAT1        | metastasis associated lung adenocarcinoma transcript 1 (non-p  | 0.08  | 0.02  | 0.85  | 0.26  | 1 | 1 | 0 | 0  | 1  | 0  | 1  | 0  | 1 | 0 | 1 | 0 | 0 |
| 233231_at    | MCC2          | Methylcrotonoyl-Coenzyme A carboxylase 2 (beta)                | -0.21 | -0.17 | -0.28 | 0.08  | 0 | 1 | 0 | 0  | 0  | 0  | 1  | 0  | 0 | 0 | 0 | 1 | 1 |
| 233419_at    | ---           | ---                                                            | -0.12 | -0.17 | -0.23 | 0.08  | 0 | 1 | 0 | 0  | 0  | 0  | 1  | 0  | 0 | 0 | 0 | 1 | 0 |
| 233630_at    | CDS2          | CDP-diacylglycerol synthase (phosphatidate cytidyltransferas   | -0.11 | -0.18 | -0.20 | 0.07  | 0 | 1 | 0 | 0  | 0  | 0  | 1  | 0  | 0 | 0 | 0 | 1 | 0 |
| 236153_at    | ZNF280D       | zinc finger protein 280D                                       | 0.02  | -0.05 | -0.06 | 0.20  | 0 | 1 | 0 | 0  | 0  | 0  | 1  | 0  | 0 | 0 | 0 | 1 | 0 |
| 243751_at    | CHD2          | chromodomain helicase DNA binding protein 2                    | -0.31 | -0.30 | -0.33 | -0.05 | 0 | 1 | 0 | 0  | 0  | 0  | 1  | 0  | 0 | 0 | 0 | 1 | 0 |
| 1560177_at   | CCDC66        | coiled-coil domain containing 66                               | -0.47 | -0.44 | -0.41 | -0.18 | 0 | 1 | 0 | 0  | 0  | 0  | 1  | 0  | 0 | 0 | 0 | 0 | 1 |
| 203607_at    | INPP5F        | inositol polyphosphate-5-phosphatase F                         | -0.43 | -0.32 | -0.36 | -0.07 | 0 | 1 | 0 | 0  | 0  | 0  | 1  | 0  | 0 | 0 | 0 | 1 | 1 |
| 215128_at    | ---           | ---                                                            | -0.04 | -0.13 | -0.15 | 0.14  | 0 | 1 | 0 | 0  | 0  | 0  | 1  | 0  | 0 | 0 | 0 | 1 | 0 |
| 221771_s_at  | MPHOSPH8      | M-phase phosphoprotein 8                                       | -0.37 | -0.37 | -0.41 | -0.11 | 0 | 1 | 0 | 0  | 0  | 0  | 1  | 0  | 0 | 0 | 0 | 1 | 0 |
| 226663_at    | ANKRD10       | ankyrin repeat domain 10                                       | -0.37 | -0.34 | -0.31 | -0.08 | 0 | 1 | 0 | 0  | 0  | 0  | 1  | 0  | 0 | 0 | 0 | 0 | 1 |
| 239131_at    | ADNP          | activity-dependent neuroprotector homeobox                     | -0.05 | -0.01 | -0.02 | 0.24  | 0 | 1 | 0 | 0  | 0  | 0  | 1  | 0  | 0 | 0 | 0 | 1 | 1 |
| 242490_at    | ---           | ---                                                            | -0.24 | -0.31 | -0.33 | -0.05 | 0 | 1 | 0 | 0  | 0  | 0  | 1  | 0  | 0 | 0 | 0 | 1 | 0 |
| 239258_at    | rhoq /// RHOC | ras homolog gene family, member Q; similar to small GTP bind   | -0.99 | -0.98 | -1.08 | -0.70 | 0 | 1 | 0 | 0  | 0  | 0  | 1  | 0  | 0 | 0 | 0 | 1 | 1 |
| 204475_at    | MMP1          | matrix metalloproteinase 1 (interstitial collagenase)          | -1.43 | -0.84 | -1.29 | -0.54 | 0 | 1 | 0 | 0  | 0  | 0  | 1  | 0  | 0 | 0 | 0 | 1 | 1 |
| 220458_at    | ---           | ---                                                            | -0.43 | -0.46 | -0.52 | -0.16 | 0 | 1 | 0 | 0  | 0  | 0  | 1  | 0  | 0 | 0 | 0 | 1 | 0 |
| 223940_x_at  | MALAT1        | metastasis associated lung adenocarcinoma transcript 1 (non-p  | 0.45  | 0.15  | 1.09  | 0.51  | 1 | 1 | 0 | -1 | 1  | 0  | 0  | 0  | 1 | 0 | 1 | 0 | 0 |
| 206336_at    | CXCL6         | chemokine (C-X-C motif) ligand 6 (granulocyte chemotactic pro  | 0.39  | -0.39 | -0.92 | -1.00 | 0 | 1 | 1 | 0  | 0  | 0  | 0  | 1  | 0 | 0 | 0 | 0 | 1 |
| 219890_at    | CLECSA        | C-type lectin domain family 5, member A                        | -2.33 | -2.63 | -3.29 | -3.19 | 0 | 1 | 1 | 0  | 0  | 0  | 0  | 1  | 0 | 0 | 0 | 0 | 1 |
| 216598_s_at  | CCL2          | chemokine (C-C motif) ligand 2                                 | -1.67 | -2.11 | -2.63 | -2.67 | 0 | 1 | 1 | 0  | 0  | 0  | 0  | 1  | 0 | 0 | 0 | 0 | 1 |
| 203980_at    | FABP4         | fatty acid binding protein 4, adipocyte                        | -1.40 | -1.83 | -2.29 | -2.37 | 0 | 1 | 1 | 0  | 0  | 0  | 0  | 0  | 0 | 0 | 0 | 0 | 1 |
| 212158_at    | SDC2          | syndecan 2                                                     | -2.31 | -2.81 | -3.25 | -3.32 | 0 | 1 | 1 | 0  | 0  | 0  | 0  | 1  | 0 | 0 | 0 | 0 | 1 |
| 203888_at    | THBD          | thrombomodulin                                                 | -1.61 | -2.05 | -2.29 | -2.51 | 0 | 1 | 1 | 0  | 0  | 0  | -1 | 0  | 0 | 0 | 0 | 0 | 1 |
| 204620_s_at  | VCAN          | versican                                                       | -2.61 | -3.31 | -3.62 | -3.76 | 0 | 1 | 1 | 0  | 0  | 0  | 0  | 0  | 0 | 0 | 0 | 0 | 1 |
| 208075_s_at  | CCL7          | chemokine (C-C motif) ligand 7                                 | -2.54 | -3.16 | -3.58 | -3.60 | 0 | 1 | 1 | 0  | 0  | 0  | 0  | 1  | 0 | 0 | 0 | 0 | 1 |
| 204619_s_at  | VCAN          | versican                                                       | -2.58 | -3.28 | -3.53 | -3.70 | 0 | 1 | 1 | 0  | 0  | 0  | -1 | 0  | 0 | 0 | 0 | 0 | 1 |
| 221731_x_at  | VCAN          | versican                                                       | -2.61 | -3.34 | -3.67 | -3.76 | 0 | 1 | 1 | 0  | 0  | 0  | 0  | 0  | 0 | 0 | 0 | 0 | 1 |
| 215101_s_at  | CXCL5         | chemokine (C-X-C motif) ligand 5                               | -0.44 | -1.10 | -1.17 | -1.47 | 1 | 1 | 1 | 0  | 0  | 0  | -1 | 0  | 0 | 0 | 0 | 1 | 0 |
| 204059_s_at  | ME1           | malic enzyme 1, NADP(+)-dependent, cytosolic                   | -0.63 | -0.40 | -1.11 | -0.75 | 1 | 1 | 0 | 1  | -1 | 0  | 0  | 0  | 0 | 1 | 0 | 0 | 0 |
| 212820_at    | DMXL2         | Dmx-like 2                                                     | -1.09 | -1.29 | -1.68 | -1.64 | 0 | 1 | 1 | 0  | 0  | 0  | 0  | 1  | 0 | 0 | 0 | 0 | 1 |
| 211571_s_at  | VCAN          | versican                                                       | -2.64 | -3.13 | -3.29 | -3.46 | 0 | 1 | 1 | 0  | 0  | 0  | 0  | 0  | 0 | 0 | 0 | 0 | 1 |
| 215646_s_at  | VCAN          | versican                                                       | -2.83 | -3.57 | -3.76 | -3.89 | 0 | 1 | 1 | 0  | 0  | 0  | 0  | 0  | 0 | 0 | 0 | 0 | 1 |
| 1565162_s_at | MGST1         | microsomal glutathione S-transferase 1                         | -2.37 | -2.43 | -3.02 | -2.74 | 1 | 1 | 0 | 0  | 0  | -1 | 0  | 1  | 0 | 1 | 0 | 0 | 1 |
| 208891_at    | DUSP6         | dual specificity phosphatase 6                                 | -1.39 | -1.54 | -2.03 | -1.85 | 0 | 1 | 0 | 0  | 0  | 0  | -1 | 0  | 1 | 0 | 0 | 0 | 1 |
| 212298_at    | NRP1          | neuropilin 1                                                   | -1.86 | -1.90 | -2.53 | -2.21 | 1 | 1 | 0 | 0  | 0  | 0  | -1 | 0  | 1 | 0 | 1 | 0 | 0 |
| 203535_at    | S100A9        | S100 calcium binding protein A9                                | -0.71 | -1.02 | -1.24 | -1.32 | 0 | 1 | 1 | 0  | 0  | 0  | 0  | 1  | 0 | 0 | 0 | 0 | 1 |
| 219403_s_at  | HPSE          | heparanase                                                     | -2.23 | -2.45 | -2.85 | -2.75 | 0 | 1 | 1 | 0  | 0  | 0  | 0  | 1  | 0 | 0 | 0 | 0 | 1 |
| 226281_at    | DNER          | delta/notch-like EGF repeat containing                         | -1.28 | -1.54 | -1.74 | -1.84 | 0 | 1 | 1 | 0  | 0  | 0  | 0  | 0  | 0 | 0 | 0 | 0 | 1 |
| 202917_s_at  | S100A8        | S100 calcium binding protein A8                                | -2.08 | -2.51 | -2.68 | -2.80 | 0 | 1 | 1 | 0  | 0  | 0  | 0  | 0  | 0 | 0 | 0 | 0 | 1 |
| 208892_s_at  | DUSP6         | dual specificity phosphatase 6                                 | -1.43 | -1.52 | -2.02 | -1.82 | 0 | 1 | 0 | 0  | 0  | 0  | -1 | 0  | 1 | 0 | 0 | 0 | 1 |
| 210119_at    | KCNJ15        | potassium inwardly-rectifying channel, subfamily J, member 15  | -2.59 | -2.77 | -3.05 | -3.06 | 0 | 1 | 1 | 0  | 0  | 0  | 0  | 0  | 0 | 0 | 0 | 0 | 1 |
| 228937_at    | C13orf31      | chromosome 13 open reading frame 31                            | -0.91 | -1.12 | -1.49 | -1.41 | 0 | 1 | 1 | 0  | 0  | 0  | 0  | 1  | 0 | 0 | 0 | 0 | 1 |
| 210772_at    | FPR2          | formyl peptide receptor 2                                      | -1.22 | -1.62 | -1.54 | -1.89 | 1 | 1 | 1 | 0  | 0  | 0  | -1 | 0  | 0 | 0 | 0 | 1 | 1 |
| 237252_at    | THBD          | thrombomodulin                                                 | -1.15 | -1.32 | -1.46 | -1.59 | 0 | 1 | 1 | 0  | 0  | 0  | 0  | 0  | 0 | 0 | 0 | 0 | 1 |
| 202437_s_at  | CYP1B1        | cytochrome P450, family 1, subfamily B, polypeptide 1          | -2.12 | -1.87 | -2.59 | -2.13 | 1 | 1 | 0 | 1  | -1 | 0  | 0  | 0  | 0 | 1 | 0 | 0 | 0 |
| 204058_at    | ME1           | malic enzyme 1, NADP(+)-dependent, cytosolic                   | -0.80 | -0.57 | -1.22 | -0.83 | 1 | 1 | 0 | 1  | -1 | 0  | 0  | 0  | 0 | 1 | 0 | 0 | 0 |
| 221802_s_at  | KIAA1598      | KIAA1598                                                       | -1.45 | -1.63 | -1.94 | -1.89 | 0 | 1 | 1 | 0  | 0  | 0  | 0  | 1  | 0 | 0 | 0 | 0 | 1 |
| 225662_at    | ZAK           | sterile alpha motif and leucine zipper containing kinase AZK   | -0.77 | -0.96 | -1.33 | -1.22 | 1 | 1 | 1 | 0  | 0  | 0  | 0  | 1  | 0 | 1 | 0 | 0 | 1 |
| 202435_s_at  | CYP1B1        | cytochrome P450, family 1, subfamily B, polypeptide 1          | -2.04 | -1.89 | -2.51 | -2.15 | 1 | 1 | 0 | 0  | 0  | 0  | -1 | 0  | 0 | 0 | 1 | 0 | 0 |
| 204151_x_at  | AKR1C1        | aldo-keto reductase family 1, member C1 (dihydrodiol dehydro   | -0.44 | -0.29 | -0.89 | -0.55 | 1 | 1 | 0 | 0  | 0  | 0  | -1 | 0  | 0 | 0 | 1 | 0 | 0 |
| 205576_at    | SERPIND1      | serpin peptidase inhibitor, clade D (heparin cofactor), member | 0.51  | 0.44  | 0.37  | 0.19  | 0 | 1 | 0 | 0  | 0  | 0  | 0  | -1 | 0 | 0 | 0 | 0 | 1 |
| 207316_at    | HAS1          | hyaluronan synthase 1                                          | -0.33 | -0.42 | -0.45 | -0.68 | 0 | 1 | 0 | 0  | 0  | 0  | -1 | 0  | 0 | 0 | 0 | 0 | 1 |
| 209277_at    | TFPI2         | tissue factor pathway inhibitor 2                              | 0.37  | 0.56  | 0.03  | 0.31  | 1 | 1 | 0 | 1  | -1 | 0  | 0  | 0  | 0 | 1 | 0 | 0 | 0 |
| 214681_at    | GK            | glycerol kinase                                                | -0.98 | -1.15 | -1.43 | -1.40 | 0 | 1 | 1 | 0  | 0  | 0  | 0  | 0  | 0 | 0 | 0 | 0 | 1 |
| 215761_at    | DMXL2         | Dmx-like 2                                                     | -0.89 | -1.19 | -1.38 | -1.44 | 1 | 1 | 1 | 0  | 0  | 0  | 0  | 1  | 0 | 0 | 0 | 1 | 0 |
| 223454_at    | CXCL16        | chemokine (C-X-C motif) ligand 16                              | -1.00 | -1.26 | -1.37 | -1.51 | 0 | 1 | 1 | 0  | 0  | 0  | 0  | 1  | 0 | 0 | 0 | 0 | 1 |
| 224358_s_at  | MS4A7         | membrane-spanning 4-domains, subfamily A, member 7             | -1.25 | -1.56 | -1.77 | -1.80 | 0 | 1 | 1 | 0  | 0  | 0  | 0  | 1  | 0 | 0 | 0 | 0 | 1 |
| 225283_at    | ARRDC4        | arrestin domain containing 4                                   | -1.43 | -1.40 | -1.85 | -1.65 | 1 | 1 | 0 | 0  | 0  | 0  | -1 | 0  | 1 | 0 | 1 | 0 | 0 |
| 239519_at    | NRP1          | neuropilin 1                                                   | -1.82 | -1.87 | -2.38 | -2.12 | 1 | 1 | 0 | 0  | 0  | 0  | -1 | 0  | 1 | 0 | 1 | 0 | 0 |
| 242037_at    | asph          | aspartate beta-hydroxylase                                     | -1.08 | -1.04 | -1.47 | -1.29 | 1 | 1 | 0 | 0  | 0  | 0  | -1 | 0  | 1 | 0 | 1 | 0 | 0 |
| 202381_at    | ADAM9         | ADAM metalloproteinase domain 9                                | -1.65 | -1.69 | -2.11 | -1.93 | 0 | 1 | 0 | 0  | 0  | 0  | -1 | 0  | 1 | 0 | 0 | 0 | 1 |
| 205098_at    | CCR1          | chemokine (C-C motif) receptor 1                               | -2.46 | -2.70 | -2.97 | -2.94 | 0 | 1 | 1 | 0  | 0  | 0  | 0  | 0  | 0 | 0 | 0 | 0 | 1 |
| 205119_s_at  | FPR1          | formyl peptide receptor 1                                      | -1.13 | -1.48 | -1.46 | -1.72 | 1 | 1 | 1 | 0  | 0  | 0  | -1 | 0  | 0 | 0 | 0 | 1 | 1 |
| 205237_at    | FCN1          | ficolin (collagen/fibrinogen domain containing) 1              | -0.85 | -1.01 | -1.04 | -1.25 | 0 | 1 | 0 | 0  | 0  | 0  | -1 | 0  | 0 | 0 | 0 | 0 | 1 |
| 209135_at    | ASPH          | aspartate beta-hydroxylase                                     | -1.06 | -1.00 | -1.53 | -1.24 | 1 | 1 | 0 | 0  | 0  | 0  | -1 | 0  | 1 | 0 | 1 | 0 | 0 |
| 211135_x_at  | LILRB3        | leukocyte immunoglobulin-like receptor, subfamily B (with TM   | -0.64 | -0.75 | -0.79 | -0.99 | 0 | 1 | 0 | 0  | 0  | 0  | -1 | 0  | 0 | 0 | 0 | 0 | 1 |
| 216370_s_at  | TKTL1         | transketolase-like 1                                           | -1.62 | -1.93 | -1.88 | -2.17 | 1 | 1 | 1 | 0  | 0  | 0  | -1 | 0  | 0 | 0 | 0 | 1 | 1 |
| 217996_at    | PHLDA1        | pleckstrin homology-like domain, family A, member 1            | -1.27 | -1.45 | -1.74 | -1.69 | 0 | 1 | 1 | 0  | 0  | 0  | 0  | 1  | 0 | 0 | 0 | 0 | 1 |
| 227080_at    | ZNF697        | zinc finger protein 697                                        | -1.45 | -1.45 | -1.89 | -1.69 | 1 | 1 | 0 | 0  | 0  | 0  | -1 | 0  | 1 | 0 | 1 | 0 | 0 |
| 240652_at    | ---           | ---                                                            | -0.93 | -0.91 | -0.85 | -1.15 | 0 | 1 | 0 | 0  | 0  | 0  | 0  | -1 | 0 | 0 | 0 | 0 | 1 |
| 1553313_s_at | SLC5A3        | solute carrier family 5 (sodium/myo-inositol cotransporter), m | -0.08 | 0.44  | -0.01 | 0.20  | 1 | 1 | 0 | 1  | 0  | 0  | 0  | 0  | 0 | 0 | 0 | 1 | 0 |
| 201325_s_at  | EMP1          | epithelial membrane protein 1                                  | -1.75 | -1.67 | -2.13 | -1.90 | 1 | 1 | 0 | 0  | 0  | 0  | -1 | 0  | 1 | 0 | 1 | 0 | 0 |
| 202436_s_at  | CYP1B1        | cytochrome P450, family 1, subfamily B, polypeptide 1          | -2.04 | -1.96 | -2.55 | -2.19 | 1 | 1 | 0 | 0  | 0  | 0  | -1 | 0  | 0 | 0 | 1 | 0 | 0 |
| 204014_at    | DUSP4         | dual specificity phosphatase 4                                 | -0.77 | -1.09 | -1.05 | -1.32 | 1 | 1 | 1 | 0  | 0  | 0  | 0  | -1 | 0 | 0 | 0 | 1 | 1 |
| 207697_x_at  | LILRB2        | leukocyte immunoglobulin-like receptor, subfamily B (with TM   | -0.90 | -1.14 | -1.18 | -1.37 | 0 | 1 | 1 | 0  | 0  | 0  | -1 | 0  | 0 | 0 | 0 | 0 | 1 |
| 228188_at    | FOSL2         | FOS-like antigen 2                                             | -0.67 | -0.89 | -0.97 | -1.13 | 0 | 1 | 1 | 0  | 0  | 0  | 0  | 1  | 0 | 0 | 0 | 0 | 1 |
| 1554442_at   | BEST1         | bestrophin 1                                                   | -0.31 | -0.37 | -0.40 | -0.59 | 0 | 1 | 0 | 0  | 0  | 0  | 0  | -1 | 0 | 0 | 0 | 0 | 1 |
| 1558691_a_at | DOCK4         | dedicator of cytokinesis 4                                     | -1.34 | -1.41 | -1.34 | -1.63 |   |   |   |    |    |    |    |    |   |   |   |   |   |



|              |                |                                                                 |       |       |       |       |   |   |    |   |    |    |    |   |   |   |   |   |   |
|--------------|----------------|-----------------------------------------------------------------|-------|-------|-------|-------|---|---|----|---|----|----|----|---|---|---|---|---|---|
| 211336_x_at  | LILRB1         | leukocyte immunoglobulin-like receptor, subfamily B (with TM    | -0.99 | -1.15 | -1.14 | -1.34 | 0 | 1 | 0  | 0 | 0  | 0  | -1 | 0 | 0 | 0 | 0 | 0 | 1 |
| 212944_at    | SLCSA3         | solute carrier family 5 (sodium/myo-inositol cotransporter), m  | 0.12  | 0.54  | -0.07 | 0.35  | 1 | 1 | 0  | 1 | -1 | 0  | 0  | 0 | 1 | 1 | 1 | 0 |   |
| 213472_at    | HNRNP1         | heterogeneous nuclear ribonucleoprotein H1 (H)                  | -0.32 | 0.10  | 0.13  | -0.09 | 1 | 1 | -1 | 0 | 0  | 0  | 1  | 0 | 0 | 1 | 0 | 0 |   |
| 214560_at    | FPR3           | formyl peptide receptor 3                                       | -2.75 | -2.77 | -2.68 | -2.96 | 0 | 1 | 0  | 0 | 0  | -1 | 0  | 0 | 0 | 0 | 1 | 0 |   |
| 216594_x_at  | AKR1C1         | aldo-keto reductase family 1, member C1 (dihydrodiol dehydro    | -0.30 | -0.19 | -0.62 | -0.38 | 1 | 1 | 0  | 0 | -1 | 0  | 1  | 0 | 1 | 0 | 0 | 0 |   |
| 224996_at    | ASPH           | aspartate beta-hydroxylase                                      | -0.92 | -0.84 | -1.38 | -1.03 | 1 | 1 | 0  | 0 | -1 | 0  | 1  | 0 | 1 | 0 | 1 | 0 |   |
| 228573_at    | ANTXR2         | anthrax toxin receptor 2                                        | -0.33 | -0.16 | -0.48 | -0.35 | 1 | 1 | 0  | 1 | 0  | 0  | 0  | 0 | 1 | 0 | 0 | 0 |   |
| 229900_at    | CD109          | CD109 molecule                                                  | -1.34 | -1.16 | -1.50 | -1.36 | 1 | 1 | 0  | 1 | 0  | 0  | 0  | 0 | 1 | 0 | 0 | 0 |   |
| 204011_at    | SPRY2          | sprouty homolog 2 (Drosophila)                                  | -2.56 | -2.32 | -2.87 | -2.50 | 1 | 1 | 0  | 1 | -1 | 0  | 0  | 0 | 1 | 0 | 1 | 0 |   |
| 208198_x_at  | KIR2DS1        | killer cell immunoglobulin-like receptor, two domains, short cy | 0.30  | 0.22  | 0.24  | 0.04  | 0 | 1 | 0  | 0 | 0  | -1 | 0  | 0 | 0 | 0 | 0 | 1 |   |
| 211242_x_at  | KIR2DL4        | killer cell immunoglobulin-like receptor, two domains, long cy  | 0.19  | 0.08  | 0.15  | -0.10 | 0 | 1 | 0  | 0 | 0  | -1 | 0  | 0 | 0 | 0 | 0 | 1 |   |
| 211688_x_at  | KIR3DL1 /// KI | killer cell immunoglobulin-like receptor, three domains, long c | 0.55  | 0.44  | 0.44  | 0.26  | 0 | 1 | 0  | 0 | 0  | -1 | 0  | 0 | 0 | 0 | 0 | 1 |   |
| 222693_at    | FNDC3B         | fibronectin type III domain containing 3B                       | -1.86 | -1.57 | -1.84 | -1.75 | 1 | 1 | 0  | 1 | 0  | 0  | 0  | 0 | 0 | 1 | 0 | 0 |   |
| 226364_at    | HIP1           | huntingtin interacting protein 1                                | -1.44 | -1.48 | -1.87 | -1.66 | 1 | 1 | 0  | 0 | -1 | 0  | 1  | 0 | 1 | 0 | 0 | 0 |   |
| 226545_at    | CD109          | CD109 molecule                                                  | -2.08 | -1.94 | -2.32 | -2.12 | 1 | 1 | 0  | 0 | -1 | 0  | 0  | 0 | 1 | 0 | 0 | 0 |   |
| 242871_at    | PAQR5          | progesterin and adipoQ receptor family member V                 | -1.77 | -1.67 | -2.06 | -1.85 | 1 | 1 | 0  | 0 | -1 | 0  | 0  | 0 | 1 | 0 | 0 | 0 |   |
| 1569773_at   | ATP8A1         | ATPase, aminophospholipid transporter (APLT), class I, type 8A  | -0.36 | 0.13  | 0.28  | -0.05 | 1 | 1 | -1 | 0 | 0  | 0  | 1  | 0 | 0 | 1 | 1 | 1 |   |
| 224414_s_at  | CARD6          | caspase recruitment domain family, member 6                     | -0.97 | -0.80 | -1.23 | -0.97 | 1 | 1 | 0  | 0 | -1 | 0  | 0  | 0 | 1 | 0 | 0 | 0 |   |
| 237588_at    | SMCHD1         | structural maintenance of chromosomes flexible hinge domain     | -0.16 | 0.27  | 0.24  | 0.10  | 1 | 1 | -1 | 0 | 0  | 0  | 1  | 0 | 0 | 1 | 0 | 0 |   |
| 242732_at    | NDUFB9         | NADH dehydrogenase (ubiquinone) 1 beta subcomplex, 9, 22kD      | -0.33 | 0.10  | -0.10 | -0.07 | 1 | 1 | -1 | 1 | 0  | 0  | 0  | 0 | 0 | 1 | 0 | 0 |   |
| 210152_at    | LILRB4         | leukocyte immunoglobulin-like receptor, subfamily B (with TM    | -2.20 | -2.38 | -2.38 | -2.54 | 0 | 1 | 1  | 0 | 0  | 0  | 0  | 0 | 0 | 0 | 0 | 1 |   |
| 211192_s_at  | CD84           | CD84 molecule                                                   | -0.98 | -0.62 | -0.68 | -0.78 | 1 | 1 | -1 | 0 | 0  | 0  | 1  | 0 | 0 | 1 | 0 | 0 |   |
| 221060_s_at  | TLR4           | toll-like receptor 4                                            | -0.59 | -0.78 | -0.87 | -0.94 | 0 | 1 | 1  | 0 | 0  | 0  | 0  | 0 | 0 | 0 | 0 | 1 |   |
| 205966_at    | TAF13          | TAF13 RNA polymerase II, TATA box binding protein (TBP)-asso    | -1.41 | -0.96 | -0.99 | -1.11 | 1 | 1 | -1 | 0 | 0  | 0  | 1  | 0 | 0 | 1 | 0 | 1 |   |
| 212157_at    | SDC2           | syndecan 2                                                      | -1.73 | -2.08 | -2.16 | -2.24 | 1 | 1 | 1  | 0 | 0  | 0  | 1  | 0 | 0 | 1 | 0 | 1 |   |
| 230323_s_at  | TMEM45B        | transmembrane protein 45B                                       | -0.89 | -1.09 | -1.26 | -1.24 | 0 | 1 | 1  | 0 | 0  | 0  | 0  | 0 | 0 | 0 | 0 | 1 |   |
| 230422_at    | FPR3           | formyl peptide receptor 3                                       | -3.29 | -3.61 | -3.61 | -3.76 | 0 | 1 | 1  | 0 | 0  | 0  | 0  | 0 | 0 | 0 | 0 | 1 |   |
| 232653_at    | TRPS1          | trichorhinophalangeal syndrome I                                | -0.97 | -1.14 | -1.32 | -1.29 | 0 | 1 | 1  | 0 | 0  | 0  | 1  | 0 | 0 | 0 | 0 | 1 |   |
| 235180_at    | STYX           | serine/threonine/tyrosine interacting protein                   | -0.56 | -0.24 | -0.21 | -0.39 | 1 | 1 | -1 | 0 | 0  | 0  | 1  | 0 | 0 | 1 | 0 | 0 |   |
| 242408_at    | STYX           | serine/threonine/tyrosine interacting protein                   | -0.64 | -0.23 | -0.22 | -0.37 | 1 | 1 | -1 | 0 | 0  | 0  | 1  | 0 | 0 | 1 | 0 | 1 |   |
| 243299_at    | VRK2           | Vaccinia related kinase 2                                       | -1.14 | -1.34 | -1.40 | -1.48 | 0 | 1 | 1  | 0 | 0  | 0  | 0  | 0 | 0 | 0 | 0 | 1 |   |
| 1554503_a_at | OSCAR          | osteoclast associated, immunoglobulin-like receptor             | -0.80 | -1.00 | -1.03 | -1.14 | 0 | 1 | 1  | 0 | 0  | 0  | 0  | 0 | 0 | 0 | 0 | 1 |   |
| 203889_at    | SCG5           | secretogranin V (7B2 protein)                                   | -2.99 | -3.12 | -3.61 | -3.26 | 1 | 1 | 0  | 0 | -1 | 0  | 1  | 0 | 1 | 0 | 0 | 0 |   |
| 204088_at    | P2RX4          | purinergic receptor P2X, ligand-gated ion channel, 4            | -0.55 | -0.74 | -0.81 | -0.87 | 0 | 1 | 1  | 0 | 0  | 0  | 0  | 0 | 0 | 0 | 0 | 1 |   |
| 1552703_s_at | CARD16 /// CA  | caspase recruitment domain family, member 16 /// caspase 1,     | 0.70  | 0.52  | 0.44  | 0.39  | 0 | 1 | 1  | 0 | 0  | 0  | 0  | 0 | 0 | 0 | 0 | 1 |   |
| 214041_x_at  | RPL37A         | Ribosomal protein L37a                                          | -0.18 | 0.19  | 0.20  | 0.06  | 1 | 1 | -1 | 0 | 0  | 0  | 1  | 0 | 0 | 1 | 0 | 0 |   |
| 230127_at    | ---            | ---                                                             | -1.02 | -0.89 | -1.35 | -1.02 | 1 | 1 | 0  | 0 | -1 | 0  | 0  | 0 | 1 | 0 | 1 | 0 |   |
| 227314_at    | ITGA2          | integrin, alpha 2 (CD49B, alpha 2 subunit of VLA-2 receptor)    | -0.87 | -0.69 | -1.06 | -0.82 | 1 | 1 | 0  | 0 | -1 | 0  | 0  | 0 | 1 | 0 | 0 | 0 |   |
| 229706_at    | tcerg1         | transcription elongation regulator 1                            | -0.18 | 0.40  | 0.44  | 0.28  | 1 | 1 | -1 | 0 | 0  | 0  | 1  | 0 | 0 | 1 | 0 | 1 |   |
| 239819_at    | ---            | ---                                                             | -0.28 | 0.12  | 0.12  | 0.01  | 1 | 1 | -1 | 0 | 0  | 0  | 1  | 0 | 0 | 1 | 0 | 1 |   |
| 207545_s_at  | NUMB           | numb homolog (Drosophila)                                       | -1.20 | -1.07 | -1.44 | -1.19 | 1 | 1 | 0  | 0 | -1 | 0  | 0  | 0 | 1 | 0 | 0 | 0 |   |
| 214149_s_at  | ATPGV0E1       | ATPase, H+ transporting, lysosomal 9kDa, V0 subunit e1          | -0.79 | -0.45 | -0.48 | -0.56 | 1 | 1 | -1 | 0 | 0  | 0  | 0  | 0 | 0 | 1 | 0 | 0 |   |
| 227195_at    | ZNF503         | zinc finger protein 503                                         | -1.18 | -1.41 | -1.37 | -1.52 | 0 | 1 | 1  | 0 | 0  | 0  | 0  | 0 | 0 | 0 | 0 | 1 |   |
| 237318_at    | Slc43a2        | solute carrier family 43, member 2                              | -1.45 | -1.63 | -1.73 | -1.74 | 0 | 1 | 1  | 0 | 0  | 0  | 1  | 0 | 0 | 0 | 0 | 1 |   |
| 240498_at    | ETV6           | ets variant 6                                                   | -1.00 | -0.69 | -0.79 | -0.80 | 1 | 1 | -1 | 0 | 0  | 0  | 0  | 0 | 0 | 1 | 0 | 0 |   |
| 240544_at    | ZFAND3         | zinc finger, AN1-type domain 3                                  | -0.61 | -0.29 | -0.43 | -0.40 | 1 | 1 | -1 | 0 | 0  | 0  | 0  | 0 | 0 | 1 | 0 | 0 |   |
| 1553252_a_at | BRWD3          | bromodomain and WD repeat domain containing 3                   | -0.50 | -0.22 | -0.18 | -0.32 | 1 | 1 | -1 | 0 | 0  | 0  | 1  | 0 | 0 | 1 | 0 | 0 |   |
| 1565598_at   | RBM47          | RNA binding motif protein 47                                    | -1.72 | -1.73 | -2.07 | -1.82 | 1 | 1 | 0  | 0 | -1 | 0  | 1  | 0 | 1 | 0 | 0 | 0 |   |
| 220253_s_at  | LRP12          | low density lipoprotein receptor-related protein 12             | -2.26 | -1.94 | -2.07 | -2.04 | 1 | 1 | -1 | 0 | 0  | 0  | 0  | 0 | 0 | 1 | 0 | 0 |   |
| 224311_s_at  | CAB39          | calcium binding protein 39                                      | -0.43 | -0.12 | 0.00  | -0.22 | 1 | 1 | -1 | 0 | 0  | 0  | 1  | 0 | 0 | 1 | 0 | 0 |   |
| 244840_x_at  | DOCK4          | dedicator of cytokinesis 4                                      | -1.16 | -1.51 | -1.61 | -1.61 | 1 | 1 | 1  | 0 | 0  | 0  | 1  | 0 | 0 | 1 | 0 | 1 |   |
| 202195_s_at  | TMED5          | transmembrane emp24 protein transport domain containing 5       | -1.07 | -1.01 | -1.27 | -1.10 | 1 | 1 | 0  | 0 | -1 | 0  | 0  | 0 | 1 | 0 | 0 | 0 |   |
| 225188_at    | RAPH1          | Ras association (RalGDS/AF-6) and pleckstrin homology domain    | -1.64 | -1.70 | -2.01 | -1.79 | 0 | 1 | 0  | 0 | -1 | 0  | 1  | 0 | 0 | 0 | 0 | 0 |   |
| 231644_at    | ---            | ---                                                             | -1.36 | -1.60 | -1.56 | -1.69 | 0 | 1 | 1  | 0 | 0  | 0  | 0  | 0 | 0 | 0 | 0 | 1 |   |
| 1555977_at   | LOC727918      | hypothetical LOC727918                                          | 0.18  | 0.08  | 0.43  | 0.00  | 1 | 1 | 0  | 0 | 1  | 0  | 0  | 0 | 1 | 0 | 1 | 0 |   |
| 1570021_at   | LOC360030      | homeobox C14                                                    | -1.05 | -0.64 | -0.87 | -0.72 | 1 | 1 | -1 | 0 | 0  | 0  | 0  | 0 | 0 | 1 | 0 | 1 |   |
| 202600_s_at  | NRIP1          | nuclear receptor interacting protein 1                          | -0.99 | -0.70 | -0.71 | -0.78 | 1 | 1 | -1 | 0 | 0  | 0  | 1  | 0 | 0 | 1 | 0 | 0 |   |
| 218273_s_at  | PDP1           | pyruvate dehydrogenase phosphatase catalytic subunit 1          | -0.41 | -0.09 | -0.04 | -0.17 | 1 | 1 | -1 | 0 | 0  | 0  | 1  | 0 | 0 | 1 | 0 | 0 |   |
| 222679_s_at  | DCUN1D1        | DCN1, defective in cullin neddylation 1, domain containing 1 (S | -0.67 | -0.31 | -0.38 | -0.38 | 1 | 1 | -1 | 0 | 0  | 0  | 1  | 0 | 0 | 1 | 0 | 1 |   |
| 222880_at    | AKT3           | v-akt murine thymoma viral oncogene homolog 3 (protein kinase   | -0.67 | -0.33 | -0.33 | -0.41 | 1 | 1 | -1 | 0 | 0  | 0  | 1  | 0 | 0 | 1 | 0 | 0 |   |
| 235451_at    | SMAD5          | SMAD family member 5                                            | -0.67 | -0.33 | -0.42 | -0.41 | 1 | 1 | -1 | 0 | 0  | 0  | 0  | 0 | 0 | 1 | 0 | 0 |   |
| 236327_at    | CEPT1          | choline/ethanolamine phosphotransferase 1                       | -0.47 | -0.16 | -0.29 | -0.24 | 1 | 1 | -1 | 0 | 0  | 0  | 0  | 0 | 0 | 1 | 0 | 0 |   |
| 241345_at    | MIR186 /// ZR  | microRNA 186 /// zinc finger, RAN-binding domain containing     | -0.49 | -0.10 | -0.12 | -0.18 | 1 | 1 | -1 | 0 | 0  | 0  | 1  | 0 | 0 | 1 | 0 | 1 |   |
| 202601_s_at  | HTATSF1        | HIV-1 Tat specific factor 1                                     | -0.18 | -0.10 | 0.10  | -0.17 | 0 | 1 | 0  | 0 | 1  | 0  | 0  | 0 | 0 | 0 | 1 | 0 |   |
| 217513_at    | C17orf60       | chromosome 17 open reading frame 60                             | -1.03 | -1.25 | -1.28 | -1.32 | 0 | 1 | 0  | 0 | 1  | 0  | 0  | 0 | 0 | 0 | 0 | 1 |   |
| 217576_x_at  | SOS2           | son of sevenless homolog 2 (Drosophila)                         | -0.22 | 0.03  | 0.11  | -0.04 | 0 | 1 | -1 | 0 | 0  | 0  | 1  | 0 | 0 | 0 | 0 | 0 |   |
| 227948_at    | FGD4           | FYVE, RhoGEF and PH domain containing 4                         | -1.17 | -1.37 | -1.45 | -1.45 | 0 | 1 | 1  | 0 | 0  | 0  | 1  | 0 | 0 | 0 | 0 | 1 |   |
| 228181_at    | SLC30A1        | solute carrier family 30 (zinc transporter), member 1           | 0.03  | 0.15  | -0.15 | 0.08  | 1 | 1 | 0  | 0 | -1 | 0  | 0  | 0 | 1 | 0 | 0 | 0 |   |
| 238644_at    | MYSM1          | Myb-like, SWIRM and MPN domains 1                               | -0.43 | -0.28 | -0.08 | -0.35 | 0 | 1 | 0  | 0 | 1  | 0  | 1  | 0 | 0 | 0 | 1 | 0 |   |
| 238848_at    | OTUD4          | OTU domain containing 4                                         | -0.60 | -0.28 | -0.22 | -0.35 | 1 | 1 | -1 | 0 | 0  | 0  | 1  | 0 | 0 | 1 | 0 | 0 |   |
| 1552553_a_at | NLR4           | NLR family, CARD domain containing 4                            | -1.27 | -1.58 | -1.56 | -1.64 | 1 | 1 | 1  | 0 | 0  | 0  | 0  | 0 | 0 | 1 | 0 | 1 |   |
| 1553575_at   | ND6            | NADH dehydrogenase, subunit 6 (complex I)                       | 1.28  | 1.01  | 1.09  | 0.94  | 0 | 1 | 1  | 0 | 0  | 0  | 0  | 0 | 0 | 0 | 0 | 1 |   |
| 1563445_x_at | CTSL1P8        | cathepsin L1 pseudogene 8                                       | -1.69 | -1.88 | -1.92 | -1.95 | 0 | 1 | 1  | 0 | 0  | 0  | 0  | 0 | 0 | 0 | 0 | 1 |   |
| 201299_s_at  | MOBK1B         | MOB1, Mps One Binder kinase activator-like 1B (yeast)           | -0.56 | -0.21 | -0.20 | -0.27 | 1 | 1 | -1 | 0 | 0  | 0  | 1  | 0 | 0 | 1 | 0 | 1 |   |
| 202869_at    | OAS1           | 2',5'-oligoadenylate synthetase 1, 40/46kDa                     | -0.12 | -0.33 | -0.30 | -0.39 | 0 | 1 | 1  | 0 | 0  | 0  | 0  | 0 | 0 | 0 | 0 | 1 |   |
| 210282_at    | ZMYM2          | zinc finger, MYM-type 2                                         | -0.41 | -0.01 | -0.19 | -0.07 | 1 | 1 | -1 | 0 | 0  | 0  | 0  | 0 | 0 | 1 | 0 | 1 |   |
| 210873_x_at  | APOBEC3A       | apolipoprotein B mRNA editing enzyme, catalytic polypeptide-    | -0.41 | -0.65 | -0.60 | -0.71 | 0 | 1 | 1  | 0 | 0  | 0  | 0  | 0 | 0 | 0 | 0 | 1 |   |
| 213956_at    | CEP350         | centrosomal protein 350kDa                                      | -0.26 | 0.10  | 0.07  | 0.04  | 1 | 1 | -1 | 0 | 0  | 0  | 1  | 0 | 0 | 1 | 0 | 1 |   |
| 214483_s_at  | ARFIP1         | ADP-ribosylation factor interacting protein 1                   | -0.85 | -0.57 | -0.52 | -0.63 | 1 | 1 | -1 | 0 | 0  | 0  | 1  | 0 | 0 | 1 | 0 | 0 |   |
| 218854_at    | DSE            | dermatan sulfate epimerase                                      | -1.54 | -1.51 | -1.78 | -1.57 | 1 | 1 | 0  | 0 | -1 | 0  | 0  | 0 | 1 | 0 | 0 | 0 |   |
| 219844_at    | C10orf118      | chromosome 10 open reading frame 118                            | -0.40 | -0.07 | -0.09 | -0.13 | 1 | 1 | -1 | 0 | 0  | 0  | 1  | 0 | 0 | 1 | 0 | 1 |   |
| 230742_at    | RBM6           | RNA binding motif protein 6                                     | -0.11 | 0.16  | 0.20  | 0.10  | 1 | 1 | -1 | 0 | 0  | 0  | 1  | 0 | 0 | 1 | 0 | 0 |   |
| 244579_at    | TRPS1          | trichorhinophalangeal syndrome I                                | -0.98 | -1.19 | -1.33 |       |   |   |    |   |    |    |    |   |   |   |   |   |   |



|              |               |                                                                  |       |       |       |       |   |   |    |   |    |   |   |   |   |   |   |   |
|--------------|---------------|------------------------------------------------------------------|-------|-------|-------|-------|---|---|----|---|----|---|---|---|---|---|---|---|
| 200671_s_at  | SPTBN1        | spectrin, beta, non-erythrocytic 1                               | -0.29 | -0.05 | 0.04  | -0.08 | 0 | 1 | -1 | 0 | 0  | 0 | 1 | 0 | 0 | 0 | 0 | 0 |
| 203231_s_at  | ATXN1         | ataxin 1                                                         | -0.84 | -0.53 | -0.57 | -0.55 | 1 | 1 | -1 | 0 | 0  | 0 | 1 | 0 | 0 | 1 | 0 | 1 |
| 208178_x_at  | TRIO          | triple functional domain (PTPRF interacting)                     | -1.33 | -0.98 | -1.08 | -1.00 | 1 | 1 | -1 | 0 | 0  | 0 | 0 | 0 | 1 | 0 | 1 |   |
| 209599_s_at  | PRUNE         | prune homolog (Drosophila)                                       | -0.15 | 0.07  | 0.11  | 0.05  | 0 | 1 | -1 | 0 | 0  | 0 | 1 | 0 | 0 | 0 | 0 | 0 |
| 212105_s_at  | DHX9          | DEAH (Asp-Glu-Ala-His) box polypeptide 9                         | -0.92 | -0.56 | -0.49 | -0.57 | 1 | 1 | -1 | 0 | 0  | 0 | 1 | 0 | 0 | 1 | 0 | 1 |
| 214834_at    | PAR5          | Prader-Willi/Angelman syndrome-5                                 | -0.29 | -0.01 | 0.06  | -0.03 | 1 | 1 | -1 | 0 | 0  | 0 | 1 | 0 | 0 | 1 | 0 | 0 |
| 236023_at    | CDK9          | cyclin-dependent kinase 9                                        | -0.83 | -0.49 | -0.62 | -0.51 | 1 | 1 | -1 | 0 | 0  | 0 | 0 | 0 | 0 | 1 | 0 | 1 |
| 236723_at    | Hnrnpu        | heterogeneous nuclear ribonucleoprotein U (scaffold attachment   | -0.58 | -0.24 | -0.20 | -0.26 | 1 | 1 | -1 | 0 | 0  | 0 | 1 | 0 | 0 | 1 | 0 | 1 |
| 240636_at    | C11orf61      | chromosome 11 open reading frame 61                              | -0.31 | -0.07 | 0.02  | -0.09 | 0 | 1 | -1 | 0 | 0  | 0 | 1 | 0 | 0 | 0 | 0 | 0 |
| 240957_at    | Vps26a        | vacuolar protein sorting 26 homolog A (S. pombe)                 | -0.80 | -0.51 | -0.51 | -0.53 | 1 | 1 | -1 | 0 | 0  | 0 | 1 | 0 | 0 | 1 | 0 | 1 |
| 200928_s_at  | RAB14         | RAB14, member RAS oncogene family                                | -0.40 | -0.04 | -0.14 | -0.05 | 1 | 1 | -1 | 0 | 0  | 0 | 1 | 0 | 0 | 1 | 0 | 1 |
| 224595_at    | SLC44A1       | solute carrier family 44, member 1                               | -1.13 | -1.28 | -1.51 | -1.29 | 0 | 1 | 0  | 0 | -1 | 0 | 1 | 0 | 0 | 0 | 0 | 0 |
| 227152_at    | C12orf35      | chromosome 12 open reading frame 35                              | -0.14 | 0.18  | 0.27  | 0.16  | 1 | 1 | -1 | 0 | 0  | 0 | 1 | 0 | 0 | 1 | 0 | 1 |
| 235011_at    | MAP3K2        | mitogen-activated protein kinase kinase kinase 2                 | -0.94 | -0.64 | -0.72 | -0.66 | 1 | 1 | -1 | 0 | 0  | 0 | 0 | 0 | 1 | 0 | 1 |   |
| 237118_at    | ANP32A /// LC | hepatopoietin PCn127; acidic (leucine-rich) nuclear phosphopr    | -0.52 | -0.17 | -0.18 | -0.18 | 1 | 1 | -1 | 0 | 0  | 0 | 1 | 0 | 0 | 1 | 0 | 1 |
| 237554_at    | ---           | ---                                                              | -0.86 | -0.46 | -0.61 | -0.47 | 1 | 1 | -1 | 0 | 0  | 0 | 0 | 0 | 1 | 0 | 1 |   |
| 239871_at    | CLTC          | Clathrin, heavy chain (Hc)                                       | -0.54 | -0.32 | -0.22 | -0.33 | 0 | 1 | -1 | 0 | 0  | 0 | 1 | 0 | 0 | 0 | 0 | 0 |
| 224875_at    | C5orf24       | chromosome 5 open reading frame 24                               | -0.35 | -0.01 | -0.04 | -0.02 | 1 | 1 | -1 | 0 | 0  | 0 | 0 | 0 | 1 | 0 | 1 |   |
| 238884_at    | CTNND1        | catenin (cadherin-associated protein), delta 1                   | -0.89 | -0.59 | -0.59 | -0.59 | 1 | 1 | -1 | 0 | 0  | 0 | 1 | 0 | 0 | 1 | 0 | 1 |
| 239742_at    | TULP4         | Tubby like protein 4                                             | -0.39 | -0.11 | -0.10 | -0.11 | 1 | 1 | -1 | 0 | 0  | 0 | 1 | 0 | 0 | 1 | 0 | 1 |
| 241155_at    | PIP4K2A       | phosphatidylinositol-5-phosphate 4-kinase, type II, alpha        | -0.29 | -0.03 | -0.09 | -0.03 | 1 | 1 | -1 | 0 | 0  | 0 | 0 | 0 | 1 | 0 | 1 |   |
| 60815_at     | POLR2J4       | polymerase (RNA) II (DNA directed) polypeptide J4, pseudogen     | -0.48 | -0.25 | -0.19 | -0.26 | 0 | 1 | -1 | 0 | 0  | 0 | 1 | 0 | 0 | 0 | 0 | 0 |
| 1556336_at   | RBMX          | RNA binding motif protein, X-linked                              | -0.37 | -0.10 | 0.03  | -0.09 | 1 | 1 | -1 | 0 | 0  | 0 | 1 | 0 | 0 | 1 | 0 | 1 |
| 1558747_at   | SMCHD1        | structural maintenance of chromosomes flexible hinge domain      | -0.19 | -0.22 | 0.38  | -0.21 | 1 | 1 | 0  | 0 | 1  | 0 | 1 | 0 | 1 | 0 | 1 | 0 |
| 1562527_at   | LOC283027     | hypothetical protein LOC283027                                   | 0.81  | 0.62  | 1.05  | 0.63  | 0 | 1 | 0  | 0 | 1  | 0 | 0 | 0 | 0 | 1 | 0 | 0 |
| 201073_s_at  | SMARCC1       | SWI/SNF related, matrix associated, actin dependent regulator    | -0.27 | -0.02 | -0.01 | 0.00  | 0 | 1 | -1 | 0 | 0  | 0 | 0 | 0 | 0 | 0 | 0 | 1 |
| 208575_at    | HIST1H3A      | histone cluster 1, H3a                                           | -0.25 | 0.00  | 0.00  | 0.02  | 0 | 1 | -1 | 0 | 0  | 0 | 0 | 0 | 0 | 0 | 0 | 1 |
| 210436_at    | CCT8          | chaperonin containing TCP1, subunit 8 (theta)                    | -0.34 | -0.12 | -0.02 | -0.11 | 0 | 1 | -1 | 0 | 0  | 0 | 1 | 0 | 0 | 0 | 0 | 0 |
| 212079_s_at  | MLL           | myeloid/lymphoid or mixed-lineage leukemia (trithorax homol      | -0.37 | -0.09 | -0.01 | -0.09 | 1 | 1 | -1 | 0 | 0  | 0 | 1 | 0 | 0 | 1 | 0 | 1 |
| 221695_s_at  | MAP3K2        | mitogen-activated protein kinase kinase kinase 2                 | -0.67 | -0.44 | -0.34 | -0.43 | 0 | 1 | -1 | 0 | 0  | 0 | 1 | 0 | 0 | 0 | 0 | 0 |
| 222508_s_at  | ARGLU1        | arginine and glutamate rich 1                                    | -0.10 | -0.01 | 0.18  | 0.00  | 0 | 1 | 0  | 0 | 1  | 0 | 1 | 0 | 0 | 0 | 0 | 0 |
| 223984_s_at  | NUPL1         | nucleoporin like 1                                               | -0.82 | -0.49 | -0.52 | -0.48 | 1 | 1 | -1 | 0 | 0  | 0 | 1 | 0 | 0 | 1 | 0 | 1 |
| 224152_s_at  | PBRM1         | polybromo 1                                                      | -0.76 | -0.54 | -0.45 | -0.53 | 0 | 1 | -1 | 0 | 0  | 0 | 1 | 0 | 0 | 0 | 0 | 0 |
| 224940_s_at  | PAPPA         | pregnancy-associated plasma protein A, pappalysin 1              | 0.36  | 0.27  | 0.54  | 0.28  | 1 | 1 | 0  | 0 | 1  | 0 | 0 | 0 | 1 | 0 | 0 | 0 |
| 235577_at    | ZNF652        | zinc finger protein 652                                          | -0.50 | -0.22 | -0.25 | -0.21 | 1 | 1 | -1 | 0 | 0  | 0 | 0 | 0 | 1 | 0 | 1 |   |
| 237625_s_at  | ---           | ---                                                              | -0.06 | 0.15  | 0.22  | 0.16  | 0 | 1 | -1 | 0 | 0  | 0 | 1 | 0 | 0 | 0 | 0 | 0 |
| 240613_at    | JAK1          | Janus kinase 1                                                   | -0.68 | -0.29 | -0.42 | -0.28 | 1 | 1 | -1 | 0 | 0  | 0 | 0 | 0 | 1 | 0 | 1 |   |
| 242429_at    | ZNF567        | zinc finger protein 567                                          | -0.45 | -0.20 | -0.08 | -0.19 | 0 | 1 | -1 | 0 | 0  | 0 | 1 | 0 | 0 | 0 | 0 | 0 |
| 243064_at    | mtif3         | mitochondrial translational initiation factor 3                  | -0.21 | 0.03  | 0.07  | 0.04  | 0 | 1 | -1 | 0 | 0  | 0 | 1 | 0 | 0 | 0 | 0 | 0 |
| 213638_at    | PHACTR1       | phosphatase and actin regulator 1                                | -1.46 | -1.07 | -1.13 | -1.06 | 1 | 1 | -1 | 0 | 0  | 0 | 0 | 0 | 1 | 0 | 1 |   |
| 214352_s_at  | KRAS          | v-Ki-ras2 Kirsten rat sarcoma viral oncogene homolog             | -0.33 | -0.08 | 0.00  | -0.06 | 0 | 1 | -1 | 0 | 0  | 0 | 1 | 0 | 0 | 0 | 0 | 1 |
| 215284_at    | SNX9          | sorting nexin 9                                                  | -0.47 | -0.20 | -0.28 | -0.18 | 1 | 1 | -1 | 0 | 0  | 0 | 0 | 0 | 1 | 0 | 1 |   |
| 218430_s_at  | RFX7          | regulatory factor X, 7                                           | -0.33 | 0.04  | 0.13  | 0.05  | 1 | 1 | -1 | 0 | 0  | 0 | 1 | 0 | 0 | 1 | 0 | 1 |
| 235743_at    | SNED1         | sushi, nidogen and EGF-like domains 1                            | -0.35 | -0.06 | 0.11  | -0.05 | 1 | 1 | -1 | 0 | 0  | 0 | 1 | 0 | 0 | 1 | 0 | 1 |
| 237813_at    | PCBP2         | poly(rC) binding protein 2                                       | -0.40 | -0.16 | -0.01 | -0.14 | 0 | 1 | -1 | 0 | 0  | 0 | 1 | 0 | 0 | 0 | 0 | 1 |
| 240246_at    | LOC642236     | Similar to FRG1 protein (FSHD region gene 1 protein)             | -0.57 | -0.21 | -0.24 | -0.19 | 1 | 1 | -1 | 0 | 0  | 0 | 1 | 0 | 0 | 1 | 0 | 1 |
| 241347_at    | RNF213        | ring finger protein 213                                          | 0.04  | 0.31  | 0.45  | 0.33  | 1 | 1 | -1 | 0 | 0  | 0 | 1 | 0 | 0 | 1 | 0 | 1 |
| 241955_at    | HECTD1        | HECT domain containing 1                                         | -0.59 | -0.33 | -0.19 | -0.31 | 0 | 1 | -1 | 0 | 0  | 0 | 1 | 0 | 0 | 0 | 0 | 1 |
| 1557278_s_at | TNPO1         | Transportin 1                                                    | -0.45 | -0.01 | -0.09 | 0.02  | 1 | 1 | -1 | 0 | 0  | 0 | 1 | 0 | 0 | 1 | 0 | 1 |
| 204863_s_at  | IL6ST         | interleukin 6 signal transducer (gp130, oncostatin M receptor)   | -0.30 | 0.03  | 0.00  | 0.06  | 1 | 1 | -1 | 0 | 0  | 0 | 1 | 0 | 0 | 1 | 0 | 1 |
| 211947_s_at  | BAT2L2        | HLA-B associated transcript 2-like 2                             | -0.30 | -0.03 | 0.11  | 0.01  | 1 | 1 | -1 | 0 | 0  | 0 | 1 | 0 | 0 | 1 | 0 | 1 |
| 213971_s_at  | LOC10051052   | polycomb protein SUZ12-like /// suppressor of zeste 12 homol     | -0.47 | -0.20 | -0.18 | -0.17 | 0 | 1 | -1 | 0 | 0  | 0 | 1 | 0 | 0 | 0 | 0 | 1 |
| 214806_at    | BICD1         | bicaudal D homolog 1 (Drosophila)                                | -0.19 | -0.02 | 0.10  | 0.01  | 0 | 1 | -1 | 0 | 0  | 0 | 1 | 0 | 0 | 0 | 0 | 0 |
| 240165_at    | ---           | ---                                                              | 0.26  | 0.00  | -0.11 | 0.03  | 0 | 1 | 1  | 0 | 0  | 0 | 1 | 0 | 0 | 0 | 0 | 0 |
| 244804_at    | SQSTM1        | sequestosome 1                                                   | -0.16 | 0.07  | 0.15  | 0.10  | 0 | 1 | -1 | 0 | 0  | 0 | 1 | 0 | 0 | 0 | 0 | 0 |
| 208930_s_at  | ILF3          | interleukin enhancer binding factor 3, 90kDa                     | -0.26 | -0.03 | 0.00  | 0.01  | 0 | 1 | -1 | 0 | 0  | 0 | 0 | 0 | 0 | 0 | 0 | 1 |
| 211965_at    | ZFP36L1       | zinc finger protein 36, C3H type-like 1                          | -0.28 | -0.11 | -0.02 | -0.07 | 0 | 1 | -1 | 0 | 0  | 0 | 1 | 0 | 0 | 0 | 0 | 0 |
| 212286_at    | ANKRD12       | ankyrin repeat domain 12                                         | -0.32 | -0.01 | -0.14 | 0.03  | 1 | 1 | -1 | 0 | 0  | 0 | 0 | 0 | 1 | 0 | 1 |   |
| 214250_at    | NUMA1         | nuclear mitotic apparatus protein 1                              | -0.68 | -0.26 | -0.15 | -0.21 | 1 | 1 | -1 | 0 | 0  | 0 | 1 | 0 | 0 | 1 | 0 | 1 |
| 221705_s_at  | SIKE1         | suppressor of IKBKE 1                                            | -0.40 | -0.18 | -0.07 | -0.14 | 0 | 1 | -1 | 0 | 0  | 0 | 1 | 0 | 0 | 0 | 0 | 0 |
| 222406_s_at  | PNRC2         | proline-rich nuclear receptor coactivator 2                      | -0.37 | -0.16 | -0.04 | -0.12 | 0 | 1 | -1 | 0 | 0  | 0 | 1 | 0 | 0 | 0 | 0 | 0 |
| 226975_at    | RNPC3         | RNA-binding region (RNP1, RRM) containing 3                      | -0.01 | 0.18  | 0.30  | 0.22  | 0 | 1 | -1 | 0 | 0  | 0 | 1 | 0 | 0 | 0 | 0 | 0 |
| 233309_at    | Tmem2         | transmembrane protein 2                                          | -0.07 | 0.17  | 0.16  | 0.21  | 0 | 1 | -1 | 0 | 0  | 0 | 0 | 0 | 0 | 0 | 0 | 1 |
| 233543_s_at  | FAM175A       | family with sequence similarity 175, member A                    | -0.09 | 0.19  | 0.22  | 0.22  | 1 | 1 | -1 | 0 | 0  | 0 | 1 | 0 | 0 | 1 | 0 | 1 |
| 235765_at    | TLE4          | transducin-like enhancer of split 4 (E(sp)1) homolog, Drosophila | -0.10 | 0.15  | 0.26  | 0.19  | 0 | 1 | -1 | 0 | 0  | 0 | 1 | 0 | 0 | 0 | 0 | 1 |
| 237577_at    | PCNP          | PEST proteolytic signal containing nuclear protein               | -0.45 | 0.00  | 0.08  | 0.04  | 1 | 1 | -1 | 0 | 0  | 0 | 1 | 0 | 0 | 1 | 0 | 1 |
| 238159_at    | ---           | ---                                                              | -0.54 | -0.27 | -0.35 | -0.23 | 1 | 1 | -1 | 0 | 0  | 0 | 0 | 0 | 1 | 0 | 1 |   |
| 214499_s_at  | BCLAF1        | BCL2-associated transcription factor 1                           | -0.17 | 0.07  | 0.08  | 0.12  | 0 | 1 | -1 | 0 | 0  | 0 | 0 | 0 | 0 | 0 | 0 | 1 |
| 230064_at    | ---           | ---                                                              | -0.28 | 0.01  | 0.13  | 0.06  | 1 | 1 | -1 | 0 | 0  | 0 | 1 | 0 | 0 | 1 | 0 | 1 |
| 241947_at    | LOC10023320   | hypothetical LOC100233209                                        | -0.06 | 0.17  | 0.18  | 0.22  | 0 | 1 | -1 | 0 | 0  | 0 | 0 | 0 | 0 | 0 | 0 | 1 |
| 243107_at    | CCR7          | chemokine (C-C motif) receptor 7                                 | -0.27 | 0.01  | 0.28  | 0.07  | 1 | 1 | -1 | 0 | 1  | 0 | 1 | 0 | 0 | 1 | 0 | 1 |
| 243319_at    | med31         | mediator complex subunit 31                                      | -0.48 | -0.17 | -0.24 | -0.12 | 1 | 1 | -1 | 0 | 0  | 0 | 0 | 0 | 1 | 0 | 1 |   |
| 206241_at    | KPNA5         | karyopherin alpha 5 (importin alpha 6)                           | -0.69 | -0.44 | -0.49 | -0.37 | 0 | 1 | -1 | 0 | 0  | 0 | 0 | 0 | 0 | 0 | 0 | 1 |
| 211000_s_at  | IL6ST         | interleukin 6 signal transducer (gp130, oncostatin M receptor)   | -0.42 | -0.15 | -0.15 | -0.09 | 1 | 1 | -1 | 0 | 0  | 0 | 0 | 0 | 1 | 0 | 1 |   |
| 211081_s_at  | MAP4K5        | mitogen-activated protein kinase kinase kinase kinase 5          | -0.77 | -0.32 | -0.26 | -0.27 | 1 | 1 | -1 | 0 | 0  | 0 | 1 | 0 | 0 | 1 | 0 | 1 |
| 222634_s_at  | TBL1XR1       | transducin (beta)-like 1 X-linked receptor 1                     | -0.45 | -0.27 | -0.16 | -0.21 | 0 | 1 | -1 | 0 | 0  | 0 | 1 | 0 | 0 | 0 | 0 | 0 |
| 230028_at    | kiaa0907      | KIAA0907                                                         | -0.08 | 0.15  | 0.17  | 0.21  | 0 | 1 | -1 | 0 | 0  | 0 | 0 | 0 | 0 | 0 | 0 | 1 |
| 235009_at    | BOD1L         | biorientation of chromosomes in cell division 1-like             | -0.35 | -0.08 | 0.27  | -0.02 | 1 | 1 | -1 | 0 | 1  | 0 | 1 | 0 | 1 | 1 | 1 | 1 |
| 236000_s_at  | HNRNPD        | heterogeneous nuclear ribonucleoprotein D (AU-rich element       | -0.27 | -0.05 | 0.06  | 0.01  | 0 | 1 | -1 | 0 | 0  | 0 | 1 | 0 | 0 | 0 | 0 | 1 |
| 239798_at    | ---           | ---                                                              | 0.04  | 0.28  | 0.23  | 0.34  | 0 | 1 | -1 | 0 | 0  | 0 | 0 | 0 | 0 | 0 | 0 | 1 |
| 243332_at    | GUSBP3        | glucuronidase, beta pseudogene; glucuronidase, beta pseudog      | 0.63  | 0.54  | 0.94  | 0.59  | 1 | 1 | 0  | 0 | 1  | 0 | 0 | 0 | 1 | 0 | 1 | 0 |
| 1565436_s_at | MLL           | myeloid/lymphoid or mixed-lineage leukemia (trithorax homol      | -0.16 | 0.14  | 0.25  | 0.21  | 1 | 1 | -1 | 0 | 0  | 0 | 1 | 0 | 0 | 1 | 0 | 1 |
| 201085_s_at  | SON           | SON DNA binding protein                                          | -0.32 | -0.11 | -0.07 | -0.04 | 0 | 1 | -1 | 0 | 0  | 0 | 0 | 0 | 0 | 0 | 0 | 1 |
| 210251_s_at  | RUFY3         | RUN and FYVE domain containing 3                                 | -0.42 | -0.21 | -0.21 | -0.1  |   |   |    |   |    |   |   |   |   |   |   |   |



|              |           |                                                                      |       |       |       |       |   |   |    |    |       |   |   |   |   |   |   |   |
|--------------|-----------|----------------------------------------------------------------------|-------|-------|-------|-------|---|---|----|----|-------|---|---|---|---|---|---|---|
| 240990_at    | rab5a     | RAB5A, member RAS oncogene family                                    | -0.68 | -0.39 | -0.39 | -0.28 | 1 | 1 | -1 | 0  | 0     | 0 | 1 | 0 | 0 | 1 | 0 | 1 |
| 244794_at    | ---       | ---                                                                  | -0.46 | -0.27 | -0.26 | -0.16 | 0 | 1 | -1 | 0  | 0     | 0 | 0 | 0 | 0 | 0 | 0 | 1 |
| 1564430_at   | Bat2I2    | BAT2 domain containing 1                                             | -0.66 | -0.36 | -0.48 | -0.23 | 1 | 1 | -1 | 0  | 0     | 0 | 0 | 0 | 0 | 1 | 0 | 1 |
| 211538_s_at  | HSPA2     | heat shock 70kDa protein 2                                           | -0.53 | -0.27 | -0.35 | -0.15 | 0 | 1 | -1 | 0  | 0     | 0 | 0 | 0 | 0 | 0 | 0 | 1 |
| 222538_s_at  | APPL1     | adaptor protein, phosphotyrosine interaction, PH domain and          | -0.23 | -0.04 | 0.04  | 0.08  | 0 | 1 | -1 | 0  | 0     | 0 | 1 | 0 | 0 | 0 | 0 | 1 |
| 241508_at    | ANKRD12   | ankyrin repeat domain 12                                             | -0.26 | 0.04  | 0.00  | 0.16  | 1 | 1 | -1 | 0  | 0     | 0 | 0 | 0 | 0 | 1 | 0 | 1 |
| 204560_at    | FKBP5     | FK506 binding protein 5                                              | -0.09 | 0.11  | 0.15  | 0.25  | 0 | 1 | -1 | 0  | 0     | 0 | 0 | 0 | 0 | 0 | 0 | 1 |
| 218404_at    | SNX10     | sorting nexin 10                                                     | -1.10 | -0.81 | -0.88 | -0.68 | 1 | 1 | -1 | 0  | 0     | 0 | 0 | 0 | 0 | 1 | 0 | 1 |
| 242672_at    | Rftn1     | raftlin, lipid raft linker 1                                         | -0.11 | 0.08  | 0.34  | 0.20  | 0 | 1 | -1 | 0  | 0     | 0 | 1 | 0 | 0 | 0 | 0 | 1 |
| 236505_at    | NUP62     | Nucleoporin 62kDa                                                    | -0.42 | -0.73 | -0.68 | -0.59 | 1 | 1 | 1  | 0  | 0     | 0 | 0 | 0 | 0 | 1 | 0 | 0 |
| 203394_s_at  | HES1      | hairy and enhancer of split 1, (Drosophila)                          | 0.87  | 1.13  | 1.14  | 1.28  | 0 | 1 | -1 | 0  | 0     | 0 | 0 | 0 | 0 | 0 | 0 | 0 |
| 241859_at    | PLCL1     | phospholipase C-like 1                                               | -0.29 | -0.05 | -0.11 | 0.10  | 0 | 1 | -1 | 0  | 0     | 0 | 0 | 0 | 0 | 0 | 0 | 1 |
| 244791_at    | UBAC2     | UBA domain containing 2                                              | -0.43 | -0.22 | -0.12 | -0.07 | 0 | 1 | -1 | 0  | 0     | 0 | 1 | 0 | 0 | 0 | 0 | 1 |
| 230352_at    | PRPS2     | Phosphoribosyl pyrophosphate synthetase 2                            | -0.32 | -0.09 | -0.02 | 0.07  | 0 | 1 | -1 | 0  | 0     | 0 | 1 | 0 | 0 | 0 | 0 | 1 |
| 1558971_at   | THEMIS    | thymocyte selection associated                                       | 0.01  | 0.10  | 0.09  | 0.28  | 0 | 1 | 0  | 0  | 0     | 0 | 1 | 0 | 0 | 0 | 0 | 1 |
| 1559776_at   | gm2a      | GM2 ganglioside activator                                            | -0.28 | -0.15 | -0.21 | 0.02  | 0 | 1 | 0  | 0  | 0     | 0 | 1 | 0 | 0 | 0 | 0 | 1 |
| 204165_at    | WASF1     | WAS protein family, member 1                                         | -0.27 | 0.02  | -0.16 | 0.20  | 1 | 1 | 0  | 0  | 0     | 0 | 1 | 0 | 0 | 0 | 1 | 1 |
| 240248_at    | C10orf46  | chromosome 10 open reading frame 46                                  | -0.45 | -0.19 | -0.29 | -0.01 | 1 | 1 | 0  | 0  | 0     | 0 | 1 | 0 | 0 | 0 | 1 | 1 |
| 243375_at    | GRIK1     | glutamate receptor, ionotropic, kainate 1                            | -0.15 | -0.04 | -0.14 | 0.13  | 0 | 1 | 0  | 0  | 0     | 0 | 1 | 0 | 0 | 0 | 0 | 1 |
| 204686_at    | IRS1      | insulin receptor substrate 1                                         | -0.04 | 0.07  | -0.05 | 0.25  | 0 | 1 | 0  | 0  | 0     | 0 | 1 | 0 | 0 | 0 | 0 | 1 |
| 216117_at    | EXOSC2    | exosome component 2                                                  | -0.28 | -0.20 | -0.31 | -0.02 | 0 | 1 | 0  | 0  | 0     | 0 | 1 | 0 | 0 | 0 | 0 | 1 |
| 223681_s_at  | INADL     | InaD-like (Drosophila)                                               | -0.13 | 0.01  | -0.10 | 0.19  | 0 | 1 | 0  | 0  | 0     | 0 | 1 | 0 | 0 | 0 | 0 | 1 |
| 228155_at    | C10orf58  | chromosome 10 open reading frame 58                                  | -0.17 | 0.03  | 0.00  | 0.21  | 0 | 1 | -1 | 0  | 0     | 0 | 1 | 0 | 0 | 0 | 0 | 1 |
| 231873_at    | BMPR2     | bone morphogenetic protein receptor, type II (serine/threonin        | -0.61 | -0.45 | -0.60 | -0.27 | 0 | 1 | 0  | 0  | 0     | 0 | 1 | 0 | 0 | 0 | 0 | 1 |
| 232740_at    | MCM3AP-AS | MCM3AP antisense RNA (non-protein coding)                            | -0.08 | -0.03 | -0.11 | 0.16  | 0 | 1 | 0  | 0  | 0     | 0 | 1 | 0 | 0 | 0 | 0 | 1 |
| 235172_at    | ---       | ---                                                                  | -0.40 | -0.18 | -0.16 | 0.00  | 0 | 1 | -1 | 0  | 0     | 0 | 0 | 0 | 0 | 0 | 0 | 1 |
| 1562255_at   | SYTL3     | synaptotagmin-like 3                                                 | 0.00  | -0.30 | 0.09  | -0.11 | 1 | 1 | 0  | -1 | 0     | 0 | 0 | 0 | 0 | 1 | 1 | 0 |
| 1570255_s_at | ANKRD20A1 | ankyrin repeat domain 20 family, member A1 /// ankyrin repea         | 1.04  | 0.65  | 1.13  | 0.84  | 1 | 1 | 0  | -1 | 0     | 0 | 0 | 0 | 0 | 1 | 1 | 0 |
| 201689_s_at  | TPD52     | tumor protein D52                                                    | -0.18 | -0.09 | -0.09 | 0.10  | 0 | 1 | 0  | 0  | 0     | 0 | 1 | 0 | 0 | 0 | 0 | 1 |
| 201694_s_at  | EGR1      | early growth response 1                                              | -1.07 | -0.84 | -0.82 | -0.65 | 0 | 1 | -1 | 0  | 0     | 0 | 0 | 0 | 0 | 0 | 0 | 1 |
| 206398_s_at  | CD19      | CD19 molecule                                                        | -0.08 | 0.02  | 0.01  | 0.21  | 0 | 1 | 0  | 0  | 0     | 0 | 1 | 0 | 0 | 0 | 0 | 1 |
| 220643_s_at  | FAIM      | Fas apoptotic inhibitory molecule                                    | -0.71 | -0.58 | -0.62 | -0.39 | 0 | 1 | 0  | 0  | 0     | 0 | 1 | 0 | 0 | 0 | 0 | 1 |
| 229553_at    | PGM2L1    | phosphoglucomutase 2-like 1                                          | 0.03  | 0.17  | 0.19  | 0.36  | 0 | 1 | 0  | 0  | 0     | 0 | 1 | 0 | 0 | 0 | 0 | 1 |
| 229850_at    | KDSR      | 3-ketodihydroshingosine reductase                                    | 0.06  | 0.28  | 0.16  | 0.47  | 0 | 1 | 0  | 0  | 0     | 0 | 1 | 0 | 0 | 0 | 0 | 1 |
| 229869_at    | ---       | ---                                                                  | 0.12  | 0.22  | 0.16  | 0.41  | 0 | 1 | 0  | 0  | 0     | 0 | 1 | 0 | 0 | 0 | 0 | 1 |
| 231108_at    | FUS       | fused in sarcoma                                                     | -0.22 | -0.04 | -0.11 | 0.15  | 0 | 1 | 0  | 0  | 0     | 0 | 1 | 0 | 0 | 0 | 0 | 1 |
| 232181_at    | PPARGC1B  | peroxisome proliferator-activated receptor gamma, coactivato         | -0.34 | -0.22 | -0.34 | -0.04 | 0 | 1 | 0  | 0  | 0     | 0 | 1 | 0 | 0 | 0 | 0 | 1 |
| 242540_at    | DNHD1     | dynein heavy chain domain 1                                          | -0.30 | -0.17 | -0.27 | 0.02  | 0 | 1 | 0  | 0  | 0     | 0 | 1 | 0 | 0 | 0 | 0 | 1 |
| 243655_x_at  | SMARCA4   | SWI/SNF related, matrix associated, actin dependent regulator        | -0.29 | -0.21 | -0.21 | -0.02 | 0 | 1 | 0  | 0  | 0     | 0 | 1 | 0 | 0 | 0 | 0 | 1 |
| 1559006_at   | ---       | ---                                                                  | -0.31 | -0.24 | -0.33 | -0.04 | 0 | 1 | 0  | 0  | 0     | 0 | 1 | 0 | 0 | 0 | 0 | 1 |
| 1569352_at   | FNIP2     | folliculin interacting protein 2                                     | -2.19 | -1.96 | -2.06 | -1.77 | 0 | 1 | 0  | 0  | 0     | 0 | 1 | 0 | 0 | 0 | 0 | 1 |
| 242929_at    | Rhoh      | ras homolog gene family, member H                                    | -0.69 | -0.39 | -0.30 | -0.19 | 1 | 1 | -1 | 0  | -0.39 | 0 | 1 | 0 | 0 | 0 | 1 | 0 |
| 203940_s_at  | VASH1     | vasohibin 1                                                          | -0.89 | -0.85 | -0.96 | -0.64 | 0 | 1 | 0  | 0  | 0     | 0 | 1 | 0 | 0 | 0 | 0 | 1 |
| 218930_s_at  | TMEM106B  | transmembrane protein 106B                                           | -0.06 | 0.00  | 0.00  | 0.21  | 0 | 1 | 0  | 0  | 0     | 0 | 1 | 0 | 0 | 0 | 0 | 1 |
| 224435_at    | C10orf58  | chromosome 10 open reading frame 58                                  | -0.19 | -0.08 | -0.15 | 0.13  | 0 | 1 | 0  | 0  | 0     | 0 | 1 | 0 | 0 | 0 | 0 | 1 |
| 238470_at    | SYS1      | YSY1 Golgi-localized integral membrane protein homolog (S. ce        | -0.36 | -0.25 | -0.38 | -0.04 | 0 | 1 | 0  | 0  | 0     | 0 | 1 | 0 | 0 | 0 | 0 | 1 |
| 239661_at    | AFF1      | AF4/FMR2 family, member 1                                            | -0.38 | -0.23 | -0.28 | -0.02 | 0 | 1 | 0  | 0  | 0     | 0 | 1 | 0 | 0 | 0 | 0 | 1 |
| 1557113_at   | LOC283588 | hypothetical LOC283588                                               | -0.22 | -0.11 | -0.18 | 0.11  | 0 | 1 | 0  | 0  | 0     | 0 | 1 | 0 | 0 | 0 | 0 | 1 |
| 1565887_at   | TRPM7     | Transient receptor potential cation channel, subfamily M, mem        | -0.22 | -0.15 | -0.21 | 0.07  | 0 | 1 | 0  | 0  | 0     | 0 | 1 | 0 | 0 | 0 | 0 | 1 |
| 202814_s_at  | HEXIM1    | hexamethylene bis-acetamide inducible 1                              | -0.28 | -0.17 | -0.19 | 0.05  | 0 | 1 | 0  | 0  | 0     | 0 | 1 | 0 | 0 | 0 | 0 | 1 |
| 206279_at    | PRKY      | protein kinase, Y-linked                                             | -0.08 | -0.02 | -0.07 | 0.20  | 0 | 1 | 0  | 0  | 0     | 0 | 1 | 0 | 0 | 0 | 0 | 1 |
| 212592_at    | IGJ       | immunoglobulin J polypeptide, linker protein for immunoglob          | 0.19  | 0.30  | 0.32  | 0.52  | 0 | 1 | 0  | 0  | 0     | 0 | 1 | 0 | 0 | 0 | 0 | 1 |
| 214705_at    | INADL     | InaD-like (Drosophila)                                               | 0.17  | 0.28  | 0.14  | 0.51  | 0 | 1 | 0  | 0  | 0     | 0 | 1 | 0 | 0 | 0 | 0 | 1 |
| 219922_s_at  | LTBP3     | latent transforming growth factor beta binding protein 3             | 0.10  | 0.16  | 0.10  | 0.38  | 0 | 1 | 0  | 0  | 0     | 0 | 1 | 0 | 0 | 0 | 0 | 1 |
| 220068_at    | VPREB3    | pre-B lymphocyte 3                                                   | 0.02  | 0.19  | 0.21  | 0.41  | 0 | 1 | -1 | 0  | 0     | 0 | 1 | 0 | 0 | 0 | 0 | 1 |
| 228170_at    | OLIG1     | oligodendrocyte transcription factor 1                               | -1.91 | -2.18 | -2.00 | -1.96 | 1 | 1 | 0  | -1 | 0     | 0 | 0 | 0 | 0 | 0 | 1 | 0 |
| 200832_s_at  | SCD       | stearoyl-CoA desaturase (delta-9-desaturase)                         | -0.60 | -0.35 | -0.44 | -0.12 | 0 | 1 | 0  | 0  | 0     | 0 | 1 | 0 | 0 | 0 | 0 | 1 |
| 202581_at    | HSPA1A    | heat shock 70kDa protein 1A /// heat shock 70kDa protein 1B          | -0.14 | 0.11  | 0.09  | 0.34  | 0 | 1 | -1 | 0  | 0     | 0 | 1 | 0 | 0 | 0 | 0 | 1 |
| 215462_at    | PLK3      | polo-like kinase 3                                                   | -0.41 | -0.37 | -0.36 | -0.15 | 0 | 1 | 0  | 0  | 0     | 0 | 1 | 0 | 0 | 0 | 0 | 1 |
| 217951_s_at  | PHF3      | PHD finger protein 3                                                 | -0.15 | -0.09 | -0.04 | 0.14  | 0 | 1 | 0  | 0  | 0     | 0 | 1 | 0 | 0 | 0 | 0 | 1 |
| 229513_at    | STRBP     | spermatid perinuclear RNA binding protein                            | -0.16 | 0.02  | -0.05 | 0.25  | 0 | 1 | 0  | 0  | 0     | 0 | 1 | 0 | 0 | 0 | 0 | 1 |
| 234150_at    | ---       | ---                                                                  | 0.20  | 0.25  | 0.23  | 0.48  | 0 | 1 | 0  | 0  | 0     | 0 | 1 | 0 | 0 | 0 | 0 | 1 |
| 240019_at    | ---       | ---                                                                  | -0.24 | -0.09 | -0.05 | 0.14  | 0 | 1 | 0  | 0  | 0     | 0 | 1 | 0 | 0 | 0 | 0 | 1 |
| 205267_at    | POU2AF1   | POU class 2 associating factor 1                                     | -0.35 | -0.21 | -0.20 | 0.03  | 0 | 1 | 0  | 0  | 0     | 0 | 1 | 0 | 0 | 0 | 0 | 1 |
| 230896_at    | BEND4     | BEN domain containing 4                                              | -0.47 | -0.33 | -0.41 | -0.09 | 0 | 1 | 0  | 0  | 0     | 0 | 1 | 0 | 0 | 0 | 0 | 1 |
| 239278_at    | ---       | ---                                                                  | 0.01  | 0.10  | 0.12  | 0.34  | 0 | 1 | 0  | 0  | 0     | 0 | 1 | 0 | 0 | 0 | 0 | 1 |
| 205934_at    | PLCL1     | phospholipase C-like 1                                               | -0.43 | -0.34 | -0.35 | -0.09 | 0 | 1 | 0  | 0  | 0     | 0 | 1 | 0 | 0 | 0 | 0 | 1 |
| 209321_s_at  | ADCY3     | adenylate cyclase 3                                                  | 0.30  | 0.38  | 0.40  | 0.63  | 0 | 1 | 0  | 0  | 0     | 0 | 1 | 0 | 0 | 0 | 0 | 1 |
| 233251_at    | STRBP     | Spermatid perinuclear RNA binding protein                            | -0.44 | -0.18 | -0.16 | 0.07  | 0 | 1 | -1 | 0  | 0     | 0 | 1 | 0 | 0 | 0 | 0 | 1 |
| 239649_at    | gtf2i     | general transcription factor II, i; general transcription factor II, | -0.46 | -0.27 | -0.34 | -0.03 | 0 | 1 | 0  | 0  | 0     | 0 | 1 | 0 | 0 | 0 | 0 | 1 |
| 1558279_a_at | KDSR      | 3-ketodihydroshingosine reductase                                    | -0.28 | 0.00  | -0.12 | 0.26  | 1 | 1 | 0  | 0  | 0     | 0 | 1 | 0 | 0 | 0 | 1 | 1 |
| 202759_s_at  | AKAP2     | A kinase (PRKA) anchor protein 2 /// PALM2-AKAP2 readthroug          | -0.71 | -0.60 | -0.51 | -0.34 | 0 | 1 | 0  | 0  | 0     | 0 | 1 | 0 | 0 | 0 | 0 | 1 |
| 211721_s_at  | ZNF551    | zinc finger protein 551                                              | -0.10 | -0.10 | -0.05 | 0.17  | 0 | 1 | 0  | 0  | 0     | 0 | 1 | 0 | 0 | 0 | 0 | 1 |
| 219518_s_at  | ELL3      | elongation factor RNA polymerase II-like 3 /// serine incorpora      | -0.34 | -0.18 | -0.16 | 0.08  | 0 | 1 | 0  | 0  | 0     | 0 | 1 | 0 | 0 | 0 | 0 | 1 |
| 242509_at    | C16orf74  | chromosome 16 open reading frame 74                                  | -0.35 | -0.35 | -0.38 | -0.09 | 0 | 1 | 0  | 0  | 0     | 0 | 1 | 0 | 0 | 0 | 0 | 1 |
| 210845_s_at  | PLAUR     | plasminogen activator, urokinase receptor                            | -1.40 | -1.56 | -1.93 | -1.99 | 1 | 0 | 0  | 0  | 0     | 0 | 1 | 1 | 0 | 0 | 0 | 1 |
| 219869_s_at  | SLC39A8   | solute carrier family 39 (zinc transporter), member 8                | -0.33 | -0.31 | -0.58 | -0.71 | 1 | 0 | 0  | 0  | 0     | 0 | 1 | 0 | 0 | 0 | 0 | 1 |
| 1553626_a_at | C17orf57  | chromosome 17 open reading frame 57                                  | -0.16 | 0.25  | 0.27  | -0.13 | 1 | 0 | 0  | 0  | 0     | 0 | 1 | 1 | 0 | 0 | 1 | 0 |
| 209267_s_at  | SLC39A8   | solute carrier family 39 (zinc transporter), member 8                | -0.17 | -0.24 | -0.57 | -0.62 | 1 | 0 | 0  | 0  | 0     | 0 | 1 | 1 | 0 | 0 | 0 | 1 |
| 200612_s_at  | AP2B1     | adaptor-related protein complex 2, beta 1 subunit                    | 0.35  | 0.63  | 0.70  | 0.26  | 1 | 0 | 0  | 0  | 0     | 0 | 1 | 1 | 0 | 0 | 1 | 0 |
| 238727_at    | LOC440934 | hypothetical LOC440934                                               | 0.68  | 0.59  | 0.18  | 0.22  | 1 | 0 | 0  | 0  | 0     | 0 | 1 | 1 | 0 | 0 | 0 | 1 |
| 223168_at    | RHOU      | ras homolog gene family, member U                                    | -0.73 | -0.84 | -1.18 | -1.21 | 1 | 0 | 0  | 0  | 0     | 0 | 1 | 1 | 0 | 0 | 0 | 1 |
| 210042_s_at  | CTS2      | cathepsin Z                                                          | -0.32 | -0.44 | -0.74 | -0.79 | 1 | 0 | 0  | 0  | 0     | 0 | 1 | 1 | 0 | 0 | 0 | 1 |
| 44783_s_at   | HEY1      | hairy/enhancer-of-split related with YRPW motif 1                    | 0.06  | -0.09 | -0.27 | -0.42 | 1 | 0 | 0  | 0  |       |   |   |   |   |   |   |   |



|              |               |                                                                                            |       |       |       |       |   |   |   |   |   |     |   |   |   |   |   |   |
|--------------|---------------|--------------------------------------------------------------------------------------------|-------|-------|-------|-------|---|---|---|---|---|-----|---|---|---|---|---|---|
| 1558670_at   | Plekhm2       | pleckstrin homology domain containing, family M (with RUN domain)                          | -0.46 | -0.66 | -0.54 | -0.39 | 1 | 0 | 0 | 0 | 0 | 0   | 0 | 1 | 0 | 0 | 0 | 0 |
| 1562033_at   | ---           | ---                                                                                        | -0.16 | -0.30 | -0.31 | -0.03 | 1 | 0 | 0 | 0 | 0 | 0   | 0 | 1 | 0 | 0 | 1 | 0 |
| 1565888_at   | tab2          | mitogen-activated protein kinase kinase kinase 7 interacting protein                       | 0.06  | -0.10 | -0.06 | 0.17  | 1 | 0 | 0 | 0 | 0 | 0   | 0 | 1 | 0 | 0 | 0 | 0 |
| 1567032_s_at | ZNF160        | zinc finger protein 160                                                                    | -0.06 | -0.20 | 0.03  | 0.07  | 1 | 0 | 0 | 0 | 0 | 0   | 0 | 1 | 0 | 0 | 0 | 0 |
| 1570165_at   | CHST11        | carbohydrate (chondroitin 4) sulfotransferase 11                                           | -0.87 | -1.03 | -0.96 | -0.76 | 1 | 0 | 0 | 0 | 0 | 0   | 0 | 1 | 0 | 0 | 0 | 0 |
| 208268_at    | ADAM28        | ADAM metalloproteinase domain 28                                                           | -0.36 | -0.23 | -0.12 | 0.04  | 1 | 0 | 0 | 0 | 0 | 0   | 0 | 1 | 0 | 0 | 0 | 1 |
| 209508_x_at  | CFLAR         | CASP8 and FADD-like apoptosis regulator                                                    | -0.37 | -0.54 | -0.48 | -0.27 | 1 | 0 | 0 | 0 | 0 | 0   | 0 | 1 | 0 | 0 | 0 | 0 |
| 214808_at    | ---           | ---                                                                                        | -0.08 | -0.21 | -0.12 | 0.06  | 1 | 0 | 0 | 0 | 0 | 0   | 0 | 1 | 0 | 0 | 0 | 0 |
| 215645_at    | FLCN          | folliculin                                                                                 | -0.35 | -0.56 | -0.50 | -0.29 | 1 | 0 | 0 | 0 | 0 | 0   | 0 | 1 | 0 | 0 | 0 | 0 |
| 215892_at    | ZNF440        | Zinc finger protein 440                                                                    | -0.07 | -0.12 | -0.01 | 0.15  | 1 | 0 | 0 | 0 | 0 | 0   | 0 | 1 | 0 | 0 | 0 | 0 |
| 217536_x_at  | ---           | ---                                                                                        | -0.04 | -0.20 | -0.08 | 0.08  | 1 | 0 | 0 | 0 | 0 | 0   | 0 | 1 | 0 | 0 | 0 | 0 |
| 227918_s_at  | ZYG11B        | zyg-11 homolog B (C. elegans)                                                              | -0.72 | -0.56 | -0.36 | -0.29 | 1 | 0 | 0 | 0 | 0 | 0   | 1 | 1 | 0 | 0 | 0 | 1 |
| 232425_at    | SNX25         | sorting nexin 25                                                                           | 0.07  | -0.06 | 0.18  | 0.20  | 1 | 0 | 0 | 0 | 0 | 0   | 0 | 1 | 0 | 0 | 0 | 0 |
| 232927_at    | TMTC2         | transmembrane and tetratricopeptide repeat containing 2                                    | 0.02  | -0.08 | 0.03  | 0.19  | 1 | 0 | 0 | 0 | 0 | 0   | 0 | 1 | 0 | 0 | 0 | 0 |
| 234210_x_at  | ACTR2         | ARP2 actin-related protein 2 homolog (yeast)                                               | -0.42 | -0.53 | -0.43 | -0.26 | 1 | 0 | 0 | 0 | 0 | 0   | 0 | 1 | 0 | 0 | 0 | 0 |
| 237346_at    | TGDS          | TDP-glucose 4,6-dehydratase                                                                | 0.17  | -0.02 | 0.13  | 0.25  | 1 | 0 | 0 | 0 | 0 | 0   | 0 | 1 | 0 | 0 | 0 | 0 |
| 239900_x_at  | ---           | ---                                                                                        | -0.10 | -0.24 | -0.18 | 0.04  | 1 | 0 | 0 | 0 | 0 | 0   | 0 | 1 | 0 | 0 | 0 | 0 |
| 242851_at    | KIAA1919      | KIAA1919                                                                                   | -0.17 | -0.29 | -0.26 | -0.03 | 1 | 0 | 0 | 0 | 0 | 0   | 0 | 1 | 0 | 0 | 0 | 0 |
| 1552729_at   | SNHG7         | small nucleolar RNA host gene 7 (non-protein coding)                                       | 0.26  | 0.16  | 0.32  | 0.43  | 1 | 0 | 0 | 0 | 0 | 0   | 0 | 1 | 0 | 0 | 0 | 0 |
| 1554602_at   | RBM8A         | RNA binding motif protein 8A                                                               | 0.44  | 0.30  | 0.53  | 0.57  | 1 | 0 | 0 | 0 | 0 | 0   | 0 | 1 | 0 | 0 | 0 | 0 |
| 1555425_x_at | SSH2          | slingshot homolog 2 (Drosophila)                                                           | -0.11 | -0.26 | -0.14 | 0.02  | 1 | 0 | 0 | 0 | 0 | 0   | 0 | 1 | 0 | 0 | 0 | 0 |
| 1560095_s_at | GNB5          | guanine nucleotide binding protein (G protein), beta 5                                     | 0.00  | -0.16 | -0.04 | 0.11  | 1 | 0 | 0 | 0 | 0 | 0   | 0 | 1 | 0 | 0 | 0 | 0 |
| 1570048_at   | DNAJC24       | Dnaj (Hsp40) homolog, subfamily C, member 24                                               | -0.02 | -0.16 | -0.04 | 0.13  | 1 | 0 | 0 | 0 | 0 | 0   | 0 | 1 | 0 | 0 | 0 | 0 |
| 211317_s_at  | CFLAR         | CASP8 and FADD-like apoptosis regulator                                                    | -0.46 | -0.67 | -0.58 | -0.39 | 1 | 0 | 0 | 0 | 0 | 0   | 0 | 1 | 0 | 0 | 0 | 0 |
| 215083_at    | PSPC1 /// LOC | paraspeckle component 1; paraspeckle protein 1 pseudogene                                  | -0.22 | -0.41 | -0.37 | -0.13 | 1 | 0 | 0 | 0 | 0 | 0   | 0 | 1 | 0 | 0 | 0 | 0 |
| 215933_s_at  | HHEX          | hematopoietically expressed homeobox                                                       | -0.77 | -0.80 | -0.61 | -0.51 | 1 | 0 | 0 | 0 | 0 | 0   | 0 | 1 | 0 | 0 | 0 | 0 |
| 216029_at    | ---           | ---                                                                                        | 0.00  | -0.15 | -0.02 | 0.13  | 1 | 0 | 0 | 0 | 0 | 0   | 0 | 1 | 0 | 0 | 0 | 0 |
| 226825_s_at  | TMEM165       | transmembrane protein 165                                                                  | -0.50 | -0.79 | -0.65 | -0.51 | 1 | 0 | 0 | 0 | 0 | 0   | 0 | 1 | 0 | 1 | 0 | 0 |
| 229514_at    | C14orf118     | chromosome 14 open reading frame 118                                                       | -0.31 | -0.46 | -0.42 | -0.18 | 1 | 0 | 0 | 0 | 0 | 0   | 0 | 1 | 0 | 0 | 0 | 0 |
| 232049_at    | ---           | ---                                                                                        | -0.09 | -0.22 | -0.10 | 0.06  | 1 | 0 | 0 | 0 | 0 | 0   | 0 | 1 | 0 | 0 | 0 | 0 |
| 232905_at    | GTF2H5        | general transcription factor IIH, polypeptide 5                                            | 0.00  | -0.13 | -0.05 | 0.16  | 1 | 0 | 0 | 0 | 0 | 0   | 0 | 1 | 0 | 0 | 0 | 0 |
| 234596_at    | ---           | ---                                                                                        | -0.20 | -0.36 | -0.24 | -0.07 | 1 | 0 | 0 | 0 | 0 | 0   | 0 | 1 | 0 | 0 | 0 | 0 |
| 237958_at    | MCPH1         | microcephalin 1                                                                            | -0.36 | -0.32 | -0.14 | -0.04 | 1 | 0 | 0 | 0 | 0 | 0   | 0 | 1 | 0 | 0 | 0 | 1 |
| 238011_at    | C16orf72      | chromosome 16 open reading frame 72                                                        | -1.03 | -0.89 | -0.76 | -0.61 | 1 | 0 | 0 | 0 | 0 | 0   | 0 | 1 | 0 | 0 | 0 | 1 |
| 238635_at    | C5orf28       | chromosome 5 open reading frame 28                                                         | -0.44 | -0.32 | -0.12 | -0.04 | 1 | 0 | 0 | 0 | 0 | 0   | 0 | 1 | 0 | 0 | 0 | 1 |
| 241658_at    | ---           | ---                                                                                        | -0.45 | -0.59 | -0.47 | -0.31 | 1 | 0 | 0 | 0 | 0 | 0   | 0 | 1 | 0 | 0 | 0 | 0 |
| 241774_at    | ---           | ---                                                                                        | -0.15 | -0.26 | -0.09 | 0.02  | 1 | 0 | 0 | 0 | 0 | 0   | 0 | 1 | 0 | 0 | 0 | 0 |
| 243042_at    | FAM73A        | family with sequence similarity 73, member A                                               | -0.07 | -0.19 | -0.08 | 0.08  | 1 | 0 | 0 | 0 | 0 | 0   | 0 | 1 | 0 | 0 | 0 | 0 |
| 243055_at    | NKTR          | natural killer-tumor recognition sequence                                                  | 0.04  | -0.10 | 0.05  | 0.17  | 1 | 0 | 0 | 0 | 0 | 0   | 0 | 1 | 0 | 0 | 0 | 0 |
| 1556035_s_at | ZNF207        | zinc finger protein 207                                                                    | -0.15 | -0.24 | -0.11 | 0.04  | 1 | 0 | 0 | 0 | 0 | 0   | 0 | 1 | 0 | 0 | 0 | 0 |
| 1560332_at   | CHST11        | carbohydrate (chondroitin 4) sulfotransferase 11                                           | -0.88 | -1.01 | -0.97 | -0.72 | 1 | 0 | 0 | 0 | 0 | 0   | 0 | 1 | 0 | 0 | 0 | 0 |
| 205917_at    | ZNF264        | zinc finger protein 264                                                                    | -0.48 | -0.62 | -0.54 | -0.33 | 1 | 0 | 0 | 0 | 0 | 0   | 0 | 1 | 0 | 0 | 0 | 0 |
| 215336_at    | AKAP11        | A kinase (PRKA) anchor protein 11                                                          | 0.10  | -0.13 | -0.06 | 0.17  | 1 | 0 | 0 | 0 | 0 | 0   | 0 | 1 | 0 | 0 | 0 | 0 |
| 217666_at    | SIDT1         | SID1 transmembrane family, member 1                                                        | -0.23 | -0.41 | -0.25 | -0.11 | 1 | 0 | 0 | 0 | 0 | 0   | 0 | 1 | 0 | 0 | 0 | 0 |
| 220494_s_at  | ---           | ---                                                                                        | 0.17  | -0.03 | 0.09  | 0.26  | 1 | 0 | 0 | 0 | 0 | 0   | 0 | 1 | 0 | 0 | 0 | 0 |
| 220735_s_at  | SENP7         | SUMO1/sentrin specific peptidase 7                                                         | -0.19 | -0.16 | 0.09  | 0.13  | 1 | 0 | 0 | 0 | 0 | 0   | 0 | 1 | 0 | 0 | 0 | 1 |
| 221276_s_at  | SYNC          | syncollin, intermediate filament protein                                                   | -0.30 | -0.31 | -0.18 | -0.02 | 1 | 0 | 0 | 0 | 0 | 0   | 0 | 1 | 0 | 0 | 0 | 1 |
| 229060_at    | YPEL2         | yippee-like 2 (Drosophila)                                                                 | -0.13 | -0.10 | 0.11  | 0.19  | 1 | 0 | 0 | 0 | 0 | 0   | 0 | 1 | 0 | 0 | 0 | 1 |
| 232418_at    | LZTFL1        | leucine zipper transcription factor-like 1                                                 | -0.12 | -0.29 | -0.15 | 0.01  | 1 | 0 | 0 | 0 | 0 | 0   | 0 | 1 | 0 | 0 | 0 | 0 |
| 232991_at    | ARL17A /// AR | ADP-ribosylation factor-like 17 pseudogene 1; ADP-ribosylation factor-like 17 pseudogene 1 | 0.15  | -0.09 | 0.03  | 0.19  | 1 | 0 | 0 | 0 | 0 | 0   | 0 | 1 | 0 | 0 | 0 | 0 |
| 233224_at    | kpna3         | karyopherin alpha 3 (importin alpha 4)                                                     | -0.11 | -0.24 | -0.18 | 0.06  | 1 | 0 | 0 | 0 | 0 | 0   | 0 | 1 | 0 | 0 | 0 | 0 |
| 233440_at    | ---           | ---                                                                                        | -0.03 | -0.21 | -0.11 | 0.07  | 1 | 0 | 0 | 0 | 0 | 0   | 0 | 1 | 0 | 0 | 0 | 0 |
| 233596_at    | uimc1         | ubiquitin interaction motif containing 1                                                   | -0.20 | -0.35 | -0.26 | -0.06 | 1 | 0 | 0 | 0 | 0 | 0   | 0 | 1 | 0 | 0 | 0 | 0 |
| 234260_at    | CDC42SE2      | CDC42 small effector 2                                                                     | 0.12  | -0.04 | -0.01 | 0.26  | 1 | 0 | 0 | 0 | 0 | 0   | 0 | 1 | 0 | 0 | 1 | 0 |
| 238932_at    | ---           | ---                                                                                        | -0.16 | -0.30 | -0.17 | -0.01 | 1 | 0 | 0 | 0 | 0 | 0   | 0 | 1 | 0 | 0 | 0 | 0 |
| 239827_at    | C13orf15      | Chromosome 13 open reading frame 15                                                        | -0.55 | -0.51 | -0.32 | -0.21 | 1 | 0 | 0 | 0 | 0 | 0   | 0 | 1 | 0 | 0 | 0 | 1 |
| 243026_x_at  | XIAP          | X-linked inhibitor of apoptosis                                                            | -0.55 | -0.70 | -0.63 | -0.42 | 1 | 0 | 0 | 0 | 0 | 0   | 0 | 1 | 0 | 0 | 0 | 0 |
| 1555938_x_at | VIM           | vimentin                                                                                   | -0.21 | -0.14 | -0.01 | 0.16  | 1 | 0 | 0 | 0 | 0 | 0   | 0 | 1 | 0 | 0 | 0 | 1 |
| 1559044_at   | EXOSC1        | exosome component 1                                                                        | -0.21 | -0.27 | -0.06 | 0.04  | 1 | 0 | 0 | 0 | 0 | 0   | 0 | 1 | 0 | 0 | 0 | 0 |
| 1561924_at   | TOPBP1        | topoisomerase (DNA) II binding protein 1                                                   | -0.15 | -0.31 | -0.23 | -0.01 | 1 | 0 | 0 | 0 | 0 | 0   | 0 | 1 | 0 | 0 | 0 | 0 |
| 1566142_at   | GBF1          | golgi-specific brefeldin A resistant guanine nucleotide exchange factor 1                  | -0.26 | -0.43 | -0.38 | -0.13 | 1 | 0 | 0 | 0 | 0 | 0   | 0 | 1 | 0 | 0 | 0 | 0 |
| 1569387_at   | CSGALNACT1    | Chondroitin sulfate N-acetylgalactosaminyltransferase 1                                    | 0.28  | 0.07  | 0.24  | 0.38  | 1 | 0 | 0 | 0 | 0 | 0   | 0 | 1 | 0 | 0 | 0 | 0 |
| 208485_x_at  | CFLAR         | CASP8 and FADD-like apoptosis regulator                                                    | -0.48 | -0.68 | -0.59 | -0.38 | 1 | 0 | 0 | 0 | 0 | 0   | 0 | 1 | 0 | 0 | 0 | 0 |
| 215203_at    | GOLGA4        | golgin A4                                                                                  | 0.01  | -0.13 | -0.01 | 0.17  | 1 | 0 | 0 | 0 | 0 | 0   | 0 | 1 | 0 | 0 | 0 | 0 |
| 216614_at    | ITPR2         | inositol 1,4,5-triphosphate receptor, type 2                                               | -0.18 | -0.34 | -0.35 | -0.04 | 1 | 0 | 0 | 0 | 0 | 0   | 0 | 1 | 0 | 0 | 1 | 0 |
| 231875_at    | KIF21A        | kinesin family member 21A                                                                  | -0.05 | -0.18 | 0.05  | 0.12  | 1 | 0 | 0 | 0 | 0 | 0   | 0 | 1 | 0 | 0 | 0 | 0 |
| 232705_at    | LRRFIP2       | Leucine rich repeat (in FLII) interacting protein 2                                        | -0.12 | -0.30 | -0.20 | 0.00  | 1 | 0 | 0 | 0 | 0 | 0   | 0 | 1 | 0 | 0 | 0 | 0 |
| 233377_at    | ARID5B        | AT rich interactive domain 5B (MRF1-like)                                                  | -0.20 | -0.28 | -0.14 | 0.01  | 1 | 0 | 0 | 0 | 0 | 0   | 0 | 1 | 0 | 0 | 0 | 0 |
| 233832_at    | ---           | ---                                                                                        | -0.19 | -0.43 | -0.34 | -0.13 | 1 | 0 | 0 | 0 | 0 | 0   | 0 | 1 | 0 | 0 | 0 | 0 |
| 242337_at    | IGBP1 /// C14 | chromosome 14 open reading frame 19; immunoglobulin (CD72)                                 | -0.08 | -0.24 | -0.09 | 0.06  | 1 | 0 | 0 | 0 | 0 | 0   | 0 | 1 | 0 | 0 | 0 | 0 |
| 1553145_at   | FLJ39653      | hypothetical FLJ39653                                                                      | -0.10 | -0.25 | -0.13 | 0.06  | 1 | 0 | 0 | 0 | 0 | 0   | 0 | 1 | 0 | 0 | 0 | 0 |
| 1553165_at   | SYNRG         | synergin, gamma                                                                            | -0.02 | -0.17 | -0.11 | 0.15  | 1 | 0 | 0 | 0 | 0 | 0   | 0 | 1 | 0 | 0 | 0 | 0 |
| 1556654_at   | ---           | ---                                                                                        | -0.22 | -0.43 | -0.35 | -0.13 | 1 | 0 | 0 | 0 | 0 | 0   | 0 | 1 | 0 | 0 | 0 | 0 |
| 1557736_at   | NKTR          | natural killer-tumor recognition sequence                                                  | -0.30 | -0.45 | -0.41 | -0.15 | 1 | 0 | 0 | 0 | 0 | 0   | 0 | 1 | 0 | 0 | 0 | 1 |
| 1559121_s_at | ARIH2         | Ariadne homolog 2 (Drosophila)                                                             | -0.30 | -0.46 | -0.39 | -0.15 | 1 | 0 | 0 | 0 | 0 | 0   | 0 | 1 | 0 | 0 | 0 | 0 |
| 1559232_a_at | slc33a1       | solute carrier family 33 (acetyl-CoA transporter), member 1                                | -0.06 | -0.31 | -0.15 | 0.00  | 1 | 0 | 0 | 0 | 0 | 0   | 0 | 1 | 0 | 0 | 0 | 0 |
| 1562938_at   | GPAT2 /// LOC | hypothetical protein LOC150763; similar to hCG1732629; similar to GPAT2                    | 0.05  | -0.14 | -0.07 | 0.17  | 1 | 0 | 0 | 0 | 0 | 0   | 0 | 1 | 0 | 0 | 0 | 0 |
| 1565703_at   | SMAD4         | SMAD family member 4                                                                       | 0.00  | -0.23 | -0.17 | 0.08  | 1 | 0 | 0 | 0 | 0 | 0   | 0 | 1 | 0 | 0 | 0 | 0 |
| 1565811_at   | Ppp3r1        | protein phosphatase 3 (formerly 2B), regulatory subunit B, alpha                           | -0.02 | -0.12 | 0.03  | 0.19  | 1 | 0 | 0 | 0 | 0 | 0   | 0 | 1 | 0 | 0 | 0 | 0 |
| 1568997_at   | POLR1E        | polymerase (RNA) I polypeptide E, 53kDa                                                    | -0.16 | -0.32 | -0.17 | -0.01 | 1 | 0 | 0 | 0 | 0 | 0   | 0 | 1 | 0 | 0 | 0 | 0 |
| 1570339_x_at | ---           | ---                                                                                        | -0.62 | -0.86 | -0.73 | -0.55 | 1 | 0 | 0 | 0 | 0 | 0   | 0 | 1 | 0 | 0 | 0 | 0 |
| 232556_at    | ---           | ---                                                                                        | 0.24  | 0.10  | 0.36  | 0.41  | 1 | 0 | 0 | 0 | 0 | 0   | 0 | 1 | 0 | 0 | 0 | 0 |
| 232704_s_at  | LRRFIP2       | leucine rich repeat (in FLII) interacting protein 2                                        | -0.28 | -0.49 | -0.38 | -0.19 | 1 | 0 | 0 | 0 | 0 | 0   | 0 | 1 | 0 | 0 | 0 | 0 |
| 239954_at    | ZNF160        | zinc finger protein 160                                                                    | -0.13 | -0.46 | -0.31 | -0.15 | 1 | 0 | 0 | 0 | 0 | 0</ |   |   |   |   |   |   |























|              |                |                                                                 |       |       |       |       |   |   |   |   |   |   |   |   |   |   |   |   |   |
|--------------|----------------|-----------------------------------------------------------------|-------|-------|-------|-------|---|---|---|---|---|---|---|---|---|---|---|---|---|
| 229435_at    | GLIS3          | GLIS family zinc finger 3                                       | -1.64 | -1.62 | -1.92 | -1.82 | 1 | 0 | 0 | 0 | 0 | 0 | 0 | 0 | 0 | 1 | 0 | 0 | 0 |
| 201952_at    | ALCAM          | activated leukocyte cell adhesion molecule                      | -1.67 | -1.70 | -2.00 | -1.90 | 1 | 0 | 0 | 0 | 0 | 0 | 1 | 0 | 1 | 0 | 0 | 0 | 0 |
| 203921_at    | CHST2          | carbohydrate (N-acetylglucosamine-6-O) sulfotransferase 2       | 0.15  | 0.01  | -0.05 | -0.18 | 0 | 0 | 0 | 0 | 0 | 0 | 0 | 0 | 0 | 0 | 0 | 0 | 1 |
| 204204_at    | SLC31A2        | solute carrier family 31 (copper transporters), member 2        | -1.49 | -1.43 | -1.73 | -1.63 | 1 | 0 | 0 | 0 | 0 | 0 | 0 | 0 | 1 | 0 | 0 | 0 | 0 |
| 204351_at    | S100P          | S100 calcium binding protein P                                  | -0.71 | -0.80 | -0.95 | -0.99 | 0 | 0 | 0 | 0 | 0 | 0 | 0 | 0 | 0 | 0 | 0 | 0 | 1 |
| 206011_at    | CASP1          | caspase 1, apoptosis-related cysteine peptidase (interleukin 1, | 0.90  | 0.83  | 0.67  | 0.63  | 0 | 0 | 0 | 0 | 0 | 0 | 0 | 0 | 0 | 0 | 0 | 0 | 1 |
| 206522_at    | MGAM           | maltase-glucoamylase (alpha-glucosidase)                        | -1.46 | -1.57 | -1.84 | -1.77 | 0 | 0 | 0 | 0 | 0 | 0 | 0 | 0 | 0 | 0 | 0 | 0 | 1 |
| 218833_at    | ZAK            | sterile alpha motif and leucine zipper containing kinase AZK    | -0.90 | -0.99 | -1.17 | -1.18 | 0 | 0 | 0 | 0 | 0 | 0 | 0 | 0 | 0 | 0 | 0 | 0 | 1 |
| 219053_s_at  | VPS37C         | vacuolar protein sorting 37 homolog C (S. cerevisiae)           | -1.05 | -1.08 | -1.34 | -1.27 | 1 | 0 | 0 | 0 | 0 | 0 | 1 | 0 | 1 | 0 | 0 | 0 | 0 |
| 223019_at    | FAM129B        | family with sequence similarity 129, member B                   | -1.51 | -1.60 | -1.92 | -1.80 | 1 | 0 | 0 | 0 | 0 | 0 | 1 | 0 | 1 | 0 | 0 | 0 | 1 |
| 224828_at    | CPEB4          | cytoplasmic polyadenylation element binding protein 4           | -1.52 | -1.17 | -1.20 | -1.36 | 1 | 0 | 0 | 0 | 0 | 0 | 1 | 0 | 1 | 0 | 1 | 0 | 0 |
| 226517_at    | BCAT1          | branched chain amino-acid transaminase 1, cytosolic             | -1.62 | -1.63 | -1.91 | -1.84 | 1 | 0 | 0 | 0 | 0 | 0 | 1 | 0 | 1 | 0 | 0 | 0 | 0 |
| 1563745_a_at | LOC283050      | hypothetical LOC283050                                          | -2.29 | -2.29 | -2.56 | -2.48 | 1 | 0 | 0 | 0 | 0 | 0 | 1 | 0 | 1 | 0 | 0 | 0 | 0 |
| 201976_s_at  | MYO10          | myosin X                                                        | -1.08 | -1.14 | -1.36 | -1.33 | 0 | 0 | 0 | 0 | 0 | 0 | 1 | 0 | 0 | 0 | 0 | 0 | 0 |
| 205685_at    | CD86           | CD86 molecule                                                   | -1.58 | -1.67 | -1.70 | -1.86 | 0 | 0 | 0 | 0 | 0 | 0 | 0 | 0 | 0 | 0 | 0 | 0 | 1 |
| 210427_x_at  | ANXA2          | annexin A2                                                      | -1.06 | -1.14 | -1.33 | -1.33 | 0 | 0 | 0 | 0 | 0 | 0 | 1 | 0 | 0 | 0 | 0 | 0 | 1 |
| 213095_x_at  | AIF1           | allograft inflammatory factor 1                                 | -0.61 | -0.75 | -0.78 | -0.94 | 0 | 0 | 0 | 0 | 0 | 0 | 0 | 0 | 0 | 0 | 0 | 0 | 1 |
| 218035_s_at  | RBM47          | RNA binding motif protein 47                                    | -1.72 | -1.60 | -1.96 | -1.79 | 1 | 0 | 0 | 0 | 0 | 0 | 0 | 0 | 1 | 0 | 0 | 0 | 0 |
| 223405_at    | NPL            | N-acetylneuraminase pyruvate lyase (dihydrodipicolinate synt    | -2.01 | -2.12 | -2.28 | -2.31 | 0 | 0 | 0 | 0 | 0 | 0 | 0 | 0 | 0 | 0 | 0 | 0 | 1 |
| 1559485_at   | ATG2B          | ATG2 autophagy related 2 homolog B (S. cerevisiae)              | -0.10 | 0.17  | 0.06  | -0.01 | 1 | 0 | 0 | 0 | 0 | 0 | 0 | 0 | 0 | 0 | 1 | 0 | 0 |
| 1560492_at   | CRADD          | CASP2 and RIPK1 domain containing adaptor with death doma       | -0.59 | -0.71 | -0.82 | -0.89 | 0 | 0 | 0 | 0 | 0 | 0 | 0 | 0 | 0 | 0 | 0 | 0 | 1 |
| 203505_at    | ABCA1          | ATP-binding cassette, sub-family A (ABC1), member 1             | -2.02 | -1.94 | -2.22 | -2.12 | 1 | 0 | 0 | 0 | 0 | 0 | 0 | 0 | 1 | 0 | 0 | 0 | 0 |
| 204359_at    | FLRT2          | fibronectin leucine rich transmembrane protein 2                | -2.18 | -2.28 | -2.39 | -2.46 | 0 | 0 | 0 | 0 | 0 | 0 | 0 | 0 | 0 | 0 | 0 | 0 | 1 |
| 207376_at    | VENTX          | VENT homeobox homolog (Xenopus laevis)                          | -0.04 | -0.13 | -0.28 | -0.31 | 0 | 0 | 0 | 0 | 0 | 0 | 0 | 0 | 0 | 0 | 0 | 0 | 1 |
| 218676_s_at  | PCTP           | phosphatidylcholine transfer protein                            | -0.54 | -0.64 | -0.80 | -0.82 | 0 | 0 | 0 | 0 | 0 | 0 | 0 | 0 | 0 | 0 | 0 | 0 | 1 |
| 219799_s_at  | DHRS9          | dehydrogenase/reductase (SDR family) member 9                   | -1.38 | -1.48 | -1.68 | -1.66 | 0 | 0 | 0 | 0 | 0 | 0 | 1 | 0 | 0 | 0 | 0 | 0 | 1 |
| 225116_at    | HIPK2          | homeodomain interacting protein kinase 2                        | -0.58 | -0.69 | -0.89 | -0.86 | 0 | 0 | 0 | 0 | 0 | 0 | 1 | 0 | 0 | 0 | 0 | 0 | 1 |
| 227647_at    | KCNE3          | potassium voltage-gated channel, Isk-related family, member 3   | -1.53 | -1.69 | -1.83 | -1.87 | 0 | 0 | 0 | 0 | 0 | 0 | 0 | 0 | 0 | 0 | 0 | 0 | 1 |
| 233888_s_at  | SRGAP1         | SLIT-ROBO Rho GTPase activating protein 1                       | -0.54 | -0.64 | -0.69 | -0.82 | 0 | 0 | 0 | 0 | 0 | 0 | 0 | 0 | 0 | 0 | 0 | 0 | 1 |
| 236787_at    | LOC10050728    | hypothetical LOC10050728                                        | -1.66 | -1.55 | -1.83 | -1.73 | 1 | 0 | 0 | 0 | 0 | 0 | 0 | 0 | 1 | 0 | 0 | 0 | 0 |
| 208438_s_at  | FGR            | Gardner-Rasheed feline sarcoma viral (v-fgr) oncogene homolo    | -1.17 | -1.06 | -1.34 | -1.23 | 1 | 0 | 0 | 0 | 0 | 0 | 0 | 0 | 0 | 1 | 0 | 0 | 0 |
| 212501_at    | CEBPB          | CCAAT/enhancer binding protein (C/EBP), beta                    | -1.90 | -1.99 | -2.24 | -2.16 | 0 | 0 | 0 | 0 | 0 | 0 | 1 | 0 | 0 | 0 | 0 | 0 | 0 |
| 212606_at    | WDFY3          | WD repeat and FYVE domain containing 3                          | -1.74 | -1.86 | -1.97 | -2.03 | 0 | 0 | 0 | 0 | 0 | 0 | 0 | 0 | 0 | 0 | 0 | 0 | 1 |
| 214875_x_at  | APLP2          | amyloid beta (A4) precursor-like protein 2                      | -1.14 | -1.23 | -1.36 | -1.40 | 0 | 0 | 0 | 0 | 0 | 0 | 0 | 0 | 0 | 0 | 0 | 0 | 1 |
| 218880_at    | FOSL2          | FOS-like antigen 2                                              | -0.83 | -0.96 | -0.99 | -1.13 | 0 | 0 | 0 | 0 | 0 | 0 | 0 | 0 | 0 | 0 | 0 | 0 | 1 |
| 233506_at    | ---            | ---                                                             | -0.87 | -0.66 | -0.97 | -0.83 | 1 | 0 | 0 | 0 | 0 | 0 | 0 | 0 | 1 | 0 | 0 | 0 | 0 |
| 1555728_a_at | MS4A4A         | membrane-spanning 4-domains, subfamily A, member 4              | -3.21 | -3.41 | -3.37 | -3.57 | 0 | 0 | 0 | 0 | 0 | 0 | 0 | 0 | 0 | 0 | 0 | 0 | 1 |
| 200782_at    | ANXA5          | annexin A5                                                      | -0.96 | -0.91 | -1.19 | -1.07 | 1 | 0 | 0 | 0 | 0 | 0 | 0 | 0 | 1 | 0 | 0 | 0 | 0 |
| 200999_s_at  | CKAP4          | cytoskeleton-associated protein 4                               | -0.99 | -1.06 | -1.28 | -1.21 | 0 | 0 | 0 | 0 | 0 | 0 | 1 | 0 | 0 | 0 | 0 | 0 | 0 |
| 201858_s_at  | SRGN           | serglycin                                                       | -0.64 | -0.78 | -0.89 | -0.94 | 0 | 0 | 0 | 0 | 0 | 0 | 0 | 0 | 0 | 0 | 0 | 0 | 1 |
| 208426_x_at  | KIR2DL4 /// KI | killer cell immunoglobulin-like receptor, two domains, long cy  | 0.31  | 0.18  | 0.18  | 0.02  | 0 | 0 | 0 | 0 | 0 | 0 | 0 | 0 | 0 | 0 | 0 | 0 | 1 |
| 209901_at    | AIF1           | allograft inflammatory factor 1                                 | -0.69 | -0.92 | -0.86 | -1.07 | 0 | 0 | 0 | 0 | 0 | 0 | 0 | 0 | 0 | 0 | 0 | 0 | 1 |
| 210423_s_at  | SLC11A1        | solute carrier family 11 (proton-coupled divalent metal ion tra | -1.97 | -2.12 | -2.16 | -2.28 | 0 | 0 | 0 | 0 | 0 | 0 | 0 | 0 | 0 | 0 | 0 | 0 | 1 |
| 210872_x_at  | GAS7           | growth arrest-specific 7                                        | -0.18 | -0.30 | -0.36 | -0.46 | 0 | 0 | 0 | 0 | 0 | 0 | 0 | 0 | 0 | 0 | 0 | 0 | 1 |
| 211532_x_at  | KIR2DS2        | killer cell immunoglobulin-like receptor, two domains, short cy | 0.57  | 0.38  | 0.48  | 0.22  | 0 | 0 | 0 | 0 | 0 | 0 | 0 | 0 | 0 | 0 | 0 | 0 | 1 |
| 216676_x_at  | KIR3DL3        | killer cell immunoglobulin-like receptor, three domains, long c | 0.48  | 0.37  | 0.34  | 0.21  | 0 | 0 | 0 | 0 | 0 | 0 | 0 | 0 | 0 | 0 | 0 | 0 | 1 |
| 225612_s_at  | B3GNT5         | UDP-GlcNAc:betaGal beta-1,3-N-acetylglucosaminyltransferase     | -1.24 | -1.29 | -1.52 | -1.45 | 0 | 0 | 0 | 0 | 0 | 0 | 1 | 0 | 0 | 0 | 0 | 0 | 0 |
| 226905_at    | FAM101B        | family with sequence similarity 101, member B                   | -0.55 | -0.35 | -0.65 | -0.52 | 1 | 0 | 0 | 0 | 0 | 0 | 0 | 0 | 1 | 0 | 0 | 0 | 0 |
| 238762_at    | MTHFD2L        | methylenetetrahydrofolate dehydrogenase (NADP+ depend           | -0.76 | -0.68 | -0.94 | -0.83 | 1 | 0 | 0 | 0 | 0 | 0 | 0 | 0 | 1 | 0 | 0 | 0 | 0 |
| 1554390_s_at | ACTR2          | ARP2 actin-related protein 2 homolog (yeast)                    | -0.84 | -0.55 | -0.66 | -0.70 | 1 | 0 | 0 | 0 | 0 | 0 | 0 | 0 | 0 | 1 | 0 | 0 | 0 |
| 1554600_s_at | LMNA           | lamin A/C                                                       | -0.35 | -0.50 | -0.51 | -0.65 | 0 | 0 | 0 | 0 | 0 | 0 | 0 | 0 | 0 | 0 | 0 | 0 | 1 |
| 204143_s_at  | ENOSF1         | enolase superfamily member 1                                    | -0.85 | -0.98 | -0.92 | -1.13 | 0 | 0 | 0 | 0 | 0 | 0 | 0 | 0 | 0 | 0 | 0 | 0 | 1 |
| 205896_at    | SLC22A4        | solute carrier family 22 (organic cation/ergothioneine transpor | -1.73 | -1.86 | -2.03 | -2.01 | 0 | 0 | 0 | 0 | 0 | 0 | 0 | 0 | 0 | 0 | 0 | 0 | 1 |
| 207314_x_at  | KIR3DL1 /// KI | killer cell immunoglobulin-like receptor, three domains, long c | 0.55  | 0.44  | 0.47  | 0.29  | 0 | 0 | 0 | 0 | 0 | 0 | 0 | 0 | 0 | 0 | 0 | 0 | 1 |
| 209393_s_at  | EIF4E2         | eukaryotic translation initiation factor 4E family member 2     | -0.25 | -0.37 | -0.45 | -0.53 | 0 | 0 | 0 | 0 | 0 | 0 | 0 | 0 | 0 | 0 | 0 | 0 | 1 |
| 221840_at    | PTPRE          | protein tyrosine phosphatase, receptor type, E                  | -1.23 | -1.23 | -1.53 | -1.38 | 1 | 0 | 0 | 0 | 0 | 0 | 1 | 0 | 1 | 0 | 0 | 0 | 0 |
| 223551_at    | PKIB           | protein kinase (cAMP-dependent, catalytic) inhibitor beta       | 0.54  | 0.30  | 0.38  | 0.14  | 0 | 0 | 0 | 0 | 0 | 0 | 0 | 0 | 0 | 0 | 0 | 0 | 1 |
| 227013_at    | LATS2          | LATS, large tumor suppressor, homolog 2 (Drosophila)            | -0.91 | -0.91 | -1.18 | -1.06 | 1 | 0 | 0 | 0 | 0 | 0 | 1 | 0 | 1 | 0 | 0 | 0 | 0 |
| 229865_at    | FNDC3B         | fibronectin type III domain containing 3B                       | -2.20 | -2.09 | -2.38 | -2.24 | 1 | 0 | 0 | 0 | 0 | 0 | 0 | 0 | 1 | 0 | 0 | 0 | 0 |
| 235146_at    | TMCC3          | transmembrane and coiled-coil domain family 3                   | -1.17 | -1.33 | -1.42 | -1.48 | 0 | 0 | 0 | 0 | 0 | 0 | 0 | 0 | 0 | 0 | 0 | 0 | 1 |
| 203297_s_at  | JARID2         | jumonji, AT rich interactive domain 2                           | -0.70 | -0.80 | -0.97 | -0.94 | 0 | 0 | 0 | 0 | 0 | 0 | 1 | 0 | 0 | 0 | 0 | 0 | 0 |
| 203298_s_at  | JARID2         | jumonji, AT rich interactive domain 2                           | -0.84 | -0.93 | -1.13 | -1.08 | 0 | 0 | 0 | 0 | 0 | 0 | 1 | 0 | 0 | 0 | 0 | 0 | 0 |
| 208262_x_at  | MEFV           | Mediterranean fever                                             | 0.60  | 0.39  | 0.61  | 0.25  | 0 | 0 | 0 | 0 | 0 | 0 | 0 | 0 | 0 | 0 | 0 | 1 | 1 |
| 210904_s_at  | IL13RA1        | interleukin 13 receptor, alpha 1                                | -0.84 | -0.97 | -0.92 | -1.11 | 0 | 0 | 0 | 0 | 0 | 0 | 0 | 0 | 0 | 0 | 0 | 0 | 1 |
| 213926_s_at  | ARFGAP1        | ArfGAP with FG repeats 1                                        | -0.59 | -0.32 | -0.24 | -0.46 | 1 | 0 | 0 | 0 | 0 | 0 | 1 | 0 | 0 | 1 | 0 | 0 | 0 |
| 224615_x_at  | HM13           | histocompatibility (minor) 13                                   | -0.39 | -0.52 | -0.52 | -0.66 | 0 | 0 | 0 | 0 | 0 | 0 | 0 | 0 | 0 | 0 | 0 | 0 | 1 |
| 229940_at    | SETD3          | SET domain containing 3                                         | -0.79 | -0.87 | -1.08 | -1.00 | 0 | 0 | 0 | 0 | 0 | 0 | 1 | 0 | 0 | 0 | 0 | 0 | 0 |
| 235407_at    | ---            | ---                                                             | -1.07 | -1.01 | -1.30 | -1.15 | 1 | 0 | 0 | 0 | 0 | 0 | 0 | 0 | 1 | 0 | 0 | 0 | 0 |
| 242397_at    | Olr1           | oxidized low density lipoprotein (lectin-like) receptor 1       | -2.55 | -2.68 | -2.75 | -2.82 | 0 | 0 | 0 | 0 | 0 | 0 | 0 | 0 | 0 | 0 | 0 | 0 | 1 |
| 204184_s_at  | ADRBK2         | adrenergic, beta, receptor kinase 2                             | -0.67 | -0.40 | -0.54 | -0.53 | 1 | 0 | 0 | 0 | 0 | 0 | 0 | 0 | 0 | 1 | 0 | 0 | 0 |
| 207704_s_at  | GAS7           | growth arrest-specific 7                                        | 0.09  | -0.07 | -0.12 | -0.20 | 0 | 0 | 0 | 0 | 0 | 0 | 0 | 0 | 0 | 0 | 0 | 0 | 1 |
| 210184_at    | ITGAX          | integrin, alpha X (complement component 3 receptor 4 subuni     | -1.12 | -1.13 | -1.42 | -1.26 | 1 | 0 | 0 | 0 | 0 | 0 | 1 | 0 | 1 | 0 | 0 | 0 | 0 |
| 213895_at    | EMP1           | epithelial membrane protein 1                                   | -1.75 | -1.68 | -1.98 | -1.81 | 1 | 0 | 0 | 0 | 0 | 0 | 0 | 0 | 1 | 0 | 0 | 0 | 0 |
| 222651_s_at  | TRPS1          | trichorhinophalangeal syndrome I                                | -0.85 | -0.98 | -1.08 | -1.11 | 0 | 0 | 0 | 0 | 0 | 0 | 0 | 0 | 0 | 0 | 0 | 0 | 1 |
| 227854_at    | fancl          | Fanconi anemia, complementation group L                         | -1.00 | -1.17 | -1.29 | -1.30 | 0 | 0 | 0 | 0 | 0 | 0 | 1 | 0 | 0 | 0 | 0 | 0 | 1 |
| 242853_at    | FUJ34208       | hypothetical protein LOC401106                                  | -0.69 | -0.76 | -0.95 | -0.90 | 0 | 0 | 0 | 0 | 0 | 0 | 1 | 0 | 0 | 0 | 0 | 0 | 0 |
| 1555833_a_at | IRGQ           | immunity-related GTPase family, Q                               | -0.45 | -0.55 | -0.73 | -0.67 | 0 | 0 | 0 | 0 | 0 | 0 | 1 | 0 | 0 | 0 | 0 | 0 | 0 |
| 204542_at    | ST6GALNAC2     | ST6 (alpha-N-acetyl-neuraminyl-2,3-beta-galactosyl-1,3)-N-ace   | -0.69 | -0.84 | -0.72 | -0.96 | 0 | 0 | 0 | 0 | 0 | 0 | 0 | 0 | 0 | 0 | 0 | 0 | 1 |
| 208836_at    | ATP1B3         | ATPase, Na+/K+ transporting, beta 3 polypeptide                 | -0.83 | -0.72 | -1.01 | -0.85 | 1 | 0 | 0 | 0 | 0 | 0 | 0 | 0 | 1 | 0 | 0 | 0 | 0 |
| 213164       |                |                                                                 |       |       |       |       |   |   |   |   |   |   |   |   |   |   |   |   |   |



|              |              |                                                                  |       |       |       |       |   |   |   |   |   |   |   |   |   |   |   |   |
|--------------|--------------|------------------------------------------------------------------|-------|-------|-------|-------|---|---|---|---|---|---|---|---|---|---|---|---|
| 228603_at    | ACTR3        | ARP3 actin-related protein 3 homolog (yeast)                     | -0.46 | -0.16 | -0.30 | -0.23 | 1 | 0 | 0 | 0 | 0 | 0 | 0 | 0 | 0 | 0 | 0 | 0 |
| 201040_at    | GNAI2        | guanine nucleotide binding protein (G protein), alpha inhibiting | -0.11 | -0.22 | 0.03  | -0.28 | 0 | 0 | 0 | 0 | 0 | 0 | 0 | 0 | 0 | 0 | 0 | 0 |
| 212595_s_at  | DAZAP2       | DAZ associated protein 2                                         | -0.26 | -0.38 | -0.10 | -0.44 | 1 | 0 | 0 | 0 | 0 | 0 | 0 | 0 | 0 | 0 | 0 | 0 |
| 217137_x_at  | ---          | ---                                                              | 0.70  | 0.58  | 0.79  | 0.52  | 0 | 0 | 0 | 0 | 0 | 0 | 0 | 0 | 0 | 0 | 0 | 0 |
| 218506_x_at  | GLYR1        | glyoxylate reductase 1 homolog (Arabidopsis)                     | -0.03 | -0.14 | -0.29 | -0.21 | 0 | 0 | 0 | 0 | 0 | 0 | 0 | 0 | 0 | 0 | 0 | 0 |
| 228754_at    | SLC6A6       | solute carrier family 6 (neurotransmitter transporter, taurine), | -0.84 | -0.64 | -0.91 | -0.70 | 1 | 0 | 0 | 0 | 0 | 0 | 0 | 0 | 0 | 0 | 0 | 0 |
| 238420_at    | Taok1        | TAO kinase 1                                                     | -0.54 | -0.31 | -0.18 | -0.37 | 0 | 0 | 0 | 0 | 0 | 0 | 0 | 0 | 0 | 0 | 0 | 0 |
| 1553944_at   | MIA2         | melanoma inhibitory activity 2                                   | 0.27  | 0.16  | 0.39  | 0.11  | 0 | 0 | 0 | 0 | 0 | 0 | 0 | 0 | 0 | 0 | 0 | 0 |
| 212075_s_at  | CSNK2A1      | casein kinase 2, alpha 1 polypeptide                             | -0.35 | -0.17 | -0.05 | -0.22 | 0 | 0 | 0 | 0 | 0 | 0 | 0 | 0 | 0 | 0 | 0 | 0 |
| 229010_at    | CBL          | Cas-Br-M (murine) ecotropic retroviral transforming sequence     | -1.14 | -0.84 | -1.01 | -0.89 | 1 | 0 | 0 | 0 | 0 | 0 | 0 | 0 | 0 | 0 | 0 | 0 |
| 231038_s_at  | sreb2        | sterol regulatory element binding transcription factor 2         | -0.50 | -0.14 | -0.39 | -0.18 | 1 | 0 | 0 | 0 | 0 | 0 | 0 | 0 | 0 | 0 | 0 | 0 |
| 201950_x_at  | CAPZB        | capping protein (actin filament) muscle Z-line, beta             | 0.00  | -0.07 | 0.17  | -0.11 | 0 | 0 | 0 | 0 | 0 | 0 | 0 | 0 | 0 | 0 | 0 | 0 |
| 205552_s_at  | OAS1         | 2',5'-oligoadenylate synthetase 1, 40/46kDa                      | -0.46 | -0.75 | -0.57 | -0.79 | 0 | 0 | 0 | 0 | 0 | 0 | 0 | 0 | 0 | 0 | 0 | 0 |
| 213382_at    | MST1 /// MST | macrophage stimulating 1 (hepatocyte growth factor-like) /// r   | 0.37  | 0.18  | 0.45  | 0.14  | 1 | 0 | 0 | 0 | 0 | 0 | 0 | 0 | 0 | 0 | 0 | 0 |
| 213734_at    | WSB2         | WD repeat and SOCS box-containing 2                              | -0.96 | -0.69 | -0.92 | -0.73 | 1 | 0 | 0 | 0 | 0 | 0 | 0 | 0 | 0 | 0 | 0 | 0 |
| 225937_at    | CUX1         | cut-like homeobox 1                                              | -0.98 | -0.71 | -0.89 | -0.76 | 1 | 0 | 0 | 0 | 0 | 0 | 0 | 0 | 0 | 0 | 0 | 0 |
| 1557348_at   | ---          | ---                                                              | 0.39  | 0.24  | 0.49  | 0.21  | 0 | 0 | 0 | 0 | 0 | 0 | 0 | 0 | 0 | 0 | 0 | 0 |
| 208624_s_at  | EIF4G1       | eukaryotic translation initiation factor 4 gamma, 1              | -0.35 | -0.20 | -0.08 | -0.23 | 0 | 0 | 0 | 0 | 0 | 0 | 0 | 0 | 0 | 0 | 0 | 0 |
| 214155_s_at  | LARP4        | La ribonucleoprotein domain family, member 4                     | -0.75 | -0.53 | -0.81 | -0.57 | 1 | 0 | 0 | 0 | 0 | 0 | 0 | 0 | 0 | 0 | 0 | 0 |
| 225412_at    | TMEM87B      | transmembrane protein 87B                                        | -0.17 | 0.03  | 0.12  | 0.00  | 0 | 0 | 0 | 0 | 0 | 0 | 0 | 0 | 0 | 0 | 0 | 0 |
| 228365_at    | CPNE8        | copine VIII                                                      | -0.44 | -0.28 | -0.57 | -0.31 | 1 | 0 | 0 | 0 | 0 | 0 | 0 | 0 | 0 | 0 | 0 | 0 |
| 242787_at    | INCENP       | inner centromere protein antigens 135/155kDa                     | -0.64 | -0.36 | -0.51 | -0.39 | 1 | 0 | 0 | 0 | 0 | 0 | 0 | 0 | 0 | 0 | 0 | 0 |
| 235777_at    | ANKRD44      | ankyrin repeat domain 44                                         | 0.90  | 0.63  | 0.76  | 0.61  | 1 | 0 | 0 | 0 | 0 | 0 | 0 | 0 | 0 | 0 | 0 | 0 |
| 221561_at    | SOAT1        | sterol O-acyltransferase 1                                       | -2.35 | -2.02 | -2.25 | -2.03 | 1 | 0 | 0 | 0 | 0 | 0 | 0 | 0 | 0 | 0 | 0 | 0 |
| 229926_at    | ---          | ---                                                              | -0.77 | -0.53 | -0.79 | -0.53 | 1 | 0 | 0 | 0 | 0 | 0 | 0 | 0 | 0 | 0 | 0 | 0 |
| 242701_at    | TBRG1        | transforming growth factor beta regulator 1                      | -0.22 | -0.05 | 0.06  | -0.07 | 0 | 0 | 0 | 0 | 0 | 0 | 0 | 0 | 0 | 0 | 0 | 0 |
| 216388_s_at  | LTB4R        | leukotriene B4 receptor                                          | 0.15  | 0.05  | 0.12  | 0.05  | 0 | 0 | 0 | 0 | 0 | 0 | 0 | 0 | 0 | 0 | 0 | 0 |
| 202923_s_at  | GCLC         | glutamate-cysteine ligase, catalytic subunit                     | -0.58 | -0.27 | -0.50 | -0.26 | 1 | 0 | 0 | 0 | 0 | 0 | 0 | 0 | 0 | 0 | 0 | 0 |
| 207201_s_at  | SLC22A1      | solute carrier family 22 (organic cation transporter), member 1  | 0.56  | 0.93  | 0.71  | 0.94  | 1 | 0 | 0 | 0 | 0 | 0 | 0 | 0 | 0 | 0 | 0 | 0 |
| 219679_s_at  | WAC          | WW domain containing adaptor with coiled-coil                    | -0.46 | -0.32 | -0.19 | -0.32 | 0 | 0 | 0 | 0 | 0 | 0 | 0 | 0 | 0 | 0 | 0 | 0 |
| 222330_at    | PDE3B        | phosphodiesterase 3B, cGMP-inhibited                             | -0.26 | 0.03  | -0.13 | 0.04  | 1 | 0 | 0 | 0 | 0 | 0 | 0 | 0 | 0 | 0 | 0 | 0 |
| 244532_x_at  | LOC401131    | hypothetical LOC401131                                           | 0.56  | 0.33  | 0.61  | 0.34  | 0 | 0 | 0 | 0 | 0 | 0 | 0 | 0 | 0 | 0 | 0 | 0 |
| 1565358_at   | RARA         | retinoic acid receptor, alpha                                    | 0.84  | 0.46  | 0.70  | 0.49  | 1 | 0 | 0 | 0 | 0 | 0 | 0 | 0 | 0 | 0 | 0 | 0 |
| 207419_s_at  | RAC2         | ras-related C3 botulinum toxin substrate 2 (rho family, small G  | 0.07  | -0.13 | 0.14  | -0.12 | 0 | 0 | 0 | 0 | 0 | 0 | 0 | 0 | 0 | 0 | 0 | 0 |
| 213741_s_at  | KPNA1        | karyopherin alpha 1 (importin alpha 5)                           | -0.72 | -0.43 | -0.58 | -0.42 | 1 | 0 | 0 | 0 | 0 | 0 | 0 | 0 | 0 | 0 | 0 | 0 |
| 222424_s_at  | NUCKS1       | nuclear casein kinase and cyclin-dependent kinase substrate 1    | -0.18 | 0.13  | -0.01 | 0.15  | 1 | 0 | 0 | 0 | 0 | 0 | 0 | 0 | 0 | 0 | 0 | 0 |
| 236761_at    | LHFPL3       | lipoma HMGIC fusion partner-like 3                               | 0.46  | 0.29  | 0.58  | 0.31  | 1 | 0 | 0 | 0 | 0 | 0 | 0 | 0 | 0 | 0 | 0 | 0 |
| 238716_at    | FAM85A       | family with sequence similarity 85, member A                     | -0.12 | 0.05  | 0.15  | 0.07  | 0 | 0 | 0 | 0 | 0 | 0 | 0 | 0 | 0 | 0 | 0 | 0 |
| 1554873_at   | CSPP1        | centrosome and spindle pole associated protein 1                 | -0.03 | 0.06  | 0.24  | 0.08  | 0 | 0 | 0 | 0 | 0 | 0 | 0 | 0 | 0 | 0 | 0 | 0 |
| 209326_at    | SLC35A2      | solute carrier family 35 (UDP-galactose transporter), member 2   | -1.09 | -0.86 | -1.13 | -0.83 | 1 | 0 | 0 | 0 | 0 | 0 | 0 | 0 | 0 | 0 | 0 | 0 |
| 214551_s_at  | CD7          | CD7 molecule                                                     | 0.31  | 0.16  | 0.45  | 0.18  | 1 | 0 | 0 | 0 | 0 | 0 | 0 | 0 | 0 | 0 | 0 | 0 |
| 218911_at    | YEATS4       | YEATS domain containing 4                                        | -0.34 | -0.06 | -0.27 | -0.02 | 1 | 0 | 0 | 0 | 0 | 0 | 0 | 0 | 0 | 0 | 0 | 0 |
| 223515_s_at  | COQ3         | coenzyme Q3 homolog, methyltransferase (S. cerevisiae)           | -0.51 | -0.32 | -0.60 | -0.29 | 1 | 0 | 0 | 0 | 0 | 0 | 0 | 0 | 0 | 0 | 0 | 0 |
| 225202_at    | RHOBTB3      | Rho-related BTB domain containing 3                              | -0.71 | -0.44 | -0.66 | -0.41 | 1 | 0 | 0 | 0 | 0 | 0 | 0 | 0 | 0 | 0 | 0 | 0 |
| 235360_at    | PLEKHM3      | pleckstrin homology domain containing, family M, member 3        | -0.82 | -0.62 | -0.87 | -0.59 | 0 | 0 | 0 | 0 | 0 | 0 | 0 | 0 | 0 | 0 | 0 | 0 |
| 242117_at    | MAP3K3       | mitogen-activated protein kinase kinase kinase 3                 | -0.88 | -0.60 | -0.79 | -0.57 | 1 | 0 | 0 | 0 | 0 | 0 | 0 | 0 | 0 | 0 | 0 | 0 |
| 243476_at    | NF1          | neurofibromin 1                                                  | -0.73 | -0.52 | -0.77 | -0.49 | 0 | 0 | 0 | 0 | 0 | 0 | 0 | 0 | 0 | 0 | 0 | 0 |
| 203491_s_at  | CEP57        | centrosomal protein 57kDa                                        | -0.17 | -0.02 | 0.12  | 0.01  | 0 | 0 | 0 | 0 | 0 | 0 | 0 | 0 | 0 | 0 | 0 | 0 |
| 204312_x_at  | CREB1        | cAMP responsive element binding protein 1                        | -0.38 | -0.26 | -0.10 | -0.22 | 0 | 0 | 0 | 0 | 0 | 0 | 0 | 0 | 0 | 0 | 0 | 0 |
| 212794_s_at  | KIAA1033     | KIAA1033                                                         | -0.42 | -0.26 | -0.12 | -0.23 | 0 | 0 | 0 | 0 | 0 | 0 | 0 | 0 | 0 | 0 | 0 | 0 |
| 214723_x_at  | ANKRD36      | ankyrin repeat domain 36                                         | 0.08  | 0.23  | 0.40  | 0.27  | 0 | 0 | 0 | 0 | 0 | 0 | 0 | 0 | 0 | 0 | 0 | 0 |
| 229359_at    | ASXL2        | additional sex combs like 2 (Drosophila)                         | -0.60 | -0.37 | -0.49 | -0.33 | 0 | 0 | 0 | 0 | 0 | 0 | 0 | 0 | 0 | 0 | 0 | 0 |
| 230628_at    | EP400        | E1A binding protein p400                                         | -0.09 | 0.06  | 0.21  | 0.11  | 0 | 0 | 0 | 0 | 0 | 0 | 0 | 0 | 0 | 0 | 0 | 0 |
| 233063_s_at  | ---          | ---                                                              | -0.02 | 0.10  | 0.29  | 0.14  | 0 | 0 | 0 | 0 | 0 | 0 | 0 | 0 | 0 | 0 | 0 | 0 |
| 237009_at    | CD69         | CD69 molecule                                                    | -0.10 | 0.04  | 0.17  | 0.08  | 0 | 0 | 0 | 0 | 0 | 0 | 0 | 0 | 0 | 0 | 0 | 0 |
| 237322_at    | MIAT         | myocardial infarction associated transcript (non-protein coding) | 0.16  | 0.39  | 0.31  | 0.43  | 0 | 0 | 0 | 0 | 0 | 0 | 0 | 0 | 0 | 0 | 0 | 0 |
| 241814_at    | RANBP9       | RAN binding protein 9                                            | 0.07  | 0.14  | 0.34  | 0.18  | 0 | 0 | 0 | 0 | 0 | 0 | 0 | 0 | 0 | 0 | 0 | 0 |
| 244423_at    | fam107b      | family with sequence similarity 107, member B                    | -1.17 | -0.92 | -1.04 | -0.88 | 0 | 0 | 0 | 0 | 0 | 0 | 0 | 0 | 0 | 0 | 0 | 0 |
| 1555991_s_at | C22orf42     | chromosome 22 open reading frame 42                              | 0.25  | 0.36  | 0.12  | 0.41  | 0 | 0 | 0 | 0 | 0 | 0 | 0 | 0 | 0 | 0 | 0 | 0 |
| 1557049_at   | BTBD19       | BTB (POZ) domain containing 19                                   | -0.83 | -0.71 | -0.98 | -0.65 | 1 | 0 | 0 | 0 | 0 | 0 | 0 | 0 | 0 | 0 | 0 | 0 |
| 1569107_s_at | ZNF642       | zinc finger protein 642                                          | -0.57 | -0.33 | -0.53 | -0.28 | 0 | 0 | 0 | 0 | 0 | 0 | 0 | 0 | 0 | 0 | 0 | 0 |
| 200799_at    | HSPA1A       | heat shock 70kDa protein 1A                                      | -0.58 | -0.33 | -0.48 | -0.28 | 0 | 0 | 0 | 0 | 0 | 0 | 0 | 0 | 0 | 0 | 0 | 0 |
| 204170_s_at  | CKS2         | CDC28 protein kinase regulatory subunit 2                        | 0.09  | 0.32  | 0.17  | 0.36  | 0 | 0 | 0 | 0 | 0 | 0 | 0 | 0 | 0 | 0 | 0 | 0 |
| 207957_s_at  | PRKCB        | protein kinase C, beta                                           | -0.47 | -0.25 | -0.39 | -0.20 | 0 | 0 | 0 | 0 | 0 | 0 | 0 | 0 | 0 | 0 | 0 | 0 |
| 208536_s_at  | BCL2L11      | BCL2-like 11 (apoptosis facilitator)                             | -0.19 | -0.06 | 0.14  | -0.01 | 0 | 0 | 0 | 0 | 0 | 0 | 0 | 0 | 0 | 0 | 0 | 0 |
| 225939_at    | EIF4E3       | eukaryotic translation initiation factor 4E family member 3      | -0.21 | 0.05  | -0.19 | 0.10  | 1 | 0 | 0 | 0 | 0 | 0 | 0 | 0 | 0 | 0 | 0 | 0 |
| 232065_x_at  | CENPL        | centromere protein L                                             | -0.24 | 0.00  | -0.20 | 0.05  | 0 | 0 | 0 | 0 | 0 | 0 | 0 | 0 | 0 | 0 | 0 | 0 |
| 202922_at    | GCLC         | glutamate-cysteine ligase, catalytic subunit                     | -0.37 | -0.16 | -0.34 | -0.10 | 0 | 0 | 0 | 0 | 0 | 0 | 0 | 0 | 0 | 0 | 0 | 0 |
| 208103_s_at  | ANP32E       | acidic (leucine-rich) nuclear phosphoprotein 32 family, member   | -0.27 | -0.06 | -0.16 | 0.01  | 0 | 0 | 0 | 0 | 0 | 0 | 0 | 0 | 0 | 0 | 0 | 0 |
| 210995_s_at  | TRIM23       | tripartite motif-containing 23                                   | -0.37 | -0.22 | -0.04 | -0.15 | 0 | 0 | 0 | 0 | 0 | 0 | 0 | 0 | 0 | 0 | 0 | 0 |
| 213092_x_at  | DNAJC9       | Dnaj (Hsp40) homolog, subfamily C, member 9                      | -0.30 | -0.09 | -0.18 | -0.04 | 0 | 0 | 0 | 0 | 0 | 0 | 0 | 0 | 0 | 0 | 0 | 0 |
| 219073_s_at  | OSBPL10      | oxysterol binding protein-like 10                                | -0.54 | -0.21 | -0.43 | -0.14 | 1 | 0 | 0 | 0 | 0 | 0 | 0 | 0 | 0 | 0 | 0 | 0 |
| 222838_at    | SLAMF7       | SLAM family member 7                                             | 0.29  | 0.52  | 0.40  | 0.58  | 0 | 0 | 0 | 0 | 0 | 0 | 0 | 0 | 0 | 0 | 0 | 0 |
| 225633_at    | DPY19L3      | dpy-19-like 3 (C. elegans)                                       | 0.06  | 0.29  | 0.16  | 0.34  | 0 | 0 | 0 | 0 | 0 | 0 | 0 | 0 | 0 | 0 | 0 | 0 |
| 230913_at    | ---          | ---                                                              | 0.46  | 0.63  | 0.38  | 0.69  | 0 | 0 | 0 | 0 | 0 | 0 | 0 | 0 | 0 | 0 | 0 | 0 |
| 238890_at    | BRWD1        | bromodomain and WD repeat domain containing 1                    | -0.36 | -0.09 | -0.35 | -0.03 | 1 | 0 | 0 | 0 | 0 | 0 | 0 | 0 | 0 | 0 | 0 | 0 |
| 243740_at    | ---          | ---                                                              | -0.33 | -0.12 | -0.31 | -0.06 | 0 | 0 | 0 | 0 | 0 | 0 | 0 | 0 | 0 | 0 | 0 | 0 |
| 244822_at    | GART         | phosphoribosylglycinamide formyltransferase, phosphoribosyl      | -0.17 | 0.08  | -0.01 | 0.14  | 0 | 0 | 0 | 0 | 0 | 0 | 0 | 0 | 0 | 0 | 0 | 0 |
| 37433_at     | PIAS2        | protein inhibitor of activated STAT, 2                           | -0.42 | -0.14 | -0.33 | -0.08 | 1 | 0 | 0 | 0 | 0 | 0 | 0 | 0 | 0 | 0 | 0 | 0 |
| 1568680_s_at | YTHDC2       | YTH domain containing 2                                          | -0.13 | 0.00  | 0.15  | 0.07  | 0 | 0 | 0 | 0 | 0 | 0 | 0 | 0 | 0 | 0 | 0 | 0 |
| 201101_s_at  | BCLAF1       | BCL2-associated transcription factor 1                           | -0.06 | 0.02  | 0.21  | 0.09  | 0 | 0 | 0 | 0 | 0 | 0 | 0 | 0 | 0 | 0 | 0 | 0 |
| 204446_s_at  | ALOX5        | arachidonate 5-lipoxygenase                                      | -0.95 | -0.74 | -0.83 | -0.67 | 0 | 0 | 0 | 0 | 0 | 0 | 0 | 0 | 0 | 0 | 0 | 0 |
| 208859_s_at  | ATRX         | alpha thalassemia/mental retardation syndrome X-linked           | -0.14 | 0.03  | 0.16  | 0.10  | 0 | 0 | 0 | 0 | 0 | 0 | 0 | 0 | 0 | 0 | 0 | 0 |
| 209648_x_at  | SOCS5        | suppressor of cytokine signaling                                 |       |       |       |       |   |   |   |   |   |   |   |   |   |   |   |   |
